# Supplementary material for: N-Nosyl-O-bromoethyl hydroxylamine acts as a multifunctional formaldehyde, formaldimine, and 1,2-oxazetidine surrogate for C–C and C–O bond-forming reactions
Source: Royal Society of Chemistry journal article supplement (doi:10.1039/d1qo00748c), 2021-01-01

# Supporting Information

## ***N*-Nosyl-*O*-Bromoethyl Hydroxylamine Acts as Multifunctional Formaldehyde, Formaldimine, and 1,2-Oxazetidine Surrogate for the C-C and C-O Bond-Forming Reactions**

Binyu Wu,<sup>‡</sup> Xiaolu Wen,<sup>‡</sup> Hongbing Chen, and Lin Hu\*

Chongqing Key Laboratory of Natural Product Synthesis and Drug Research, School of Pharmaceutical Sciences, Chongqing University, Chongqing 401331, China.

\*Corresponding: lhu@cqu.edu.cn.

### Table of Contents

|                                                                                                                          |           |
|--------------------------------------------------------------------------------------------------------------------------|-----------|
| <b>1. General information .....</b>                                                                                      | <b>2</b>  |
| <b>2. Detection of the intermediates by ESI-HRMS and <sup>1</sup>H NMR analysis .....</b>                                | <b>2</b>  |
| <b>3. Optimization of the reaction conditions.....</b>                                                                   | <b>6</b>  |
| <b>4. General procedure for the preparation of nucleophile substrates .....</b>                                          | <b>7</b>  |
| <b>5. General procedure for the preparation of hydroxylamines 1 .....</b>                                                | <b>23</b> |
| <b>6. General procedure for the C-C bond-forming reactions.....</b>                                                      | <b>25</b> |
| <b>7. General procedure for the catalytic asymmetric reactions of indanone carboxylates 7 with hydroxylamine 1a.....</b> | <b>39</b> |
| <b>8 General procedure for the catalytic asymmetric Mannich reactions.....</b>                                           | <b>45</b> |
| <b>9. Gram-scale synthesis and synthetic applications .....</b>                                                          | <b>53</b> |
| <b>10. Determination of the relative configuration of compound 11 .....</b>                                              | <b>56</b> |
| <b>11. References .....</b>                                                                                              | <b>57</b> |
| <b>12. Spectra data for the new compounds .....</b>                                                                      | <b>59</b> |

## 1. General information

Unless otherwise stated, all reagents were purchased from commercial suppliers and used without further purification. All solvents employed in the reactions were distilled from appropriate drying agents prior to use. Analytical thin layer chromatography (TLC) was performed on precoated silica gel 60 GF254 plates. Visualization on TLC was achieved by use of UV light (254 nm). Flash column chromatography was performed using Tsingdao silica gel.  $^1\text{H}$  and  $^{13}\text{C}$  NMR spectra were recorded on Agilent 400MR DD2 (400 MHz) spectrometer or Agilent 600MR DD2 (600 MHz) spectrometer. Chemical shifts were reported in parts per million (ppm), and tetramethylsilane (TMS) or the residual solvent peak was used as an internal reference:  $^1\text{H}$  NMR (TMS,  $\delta$  0.00;  $\text{CDCl}_3$ ,  $\delta$  7.26; acetone- $d_6$   $\delta$  2.05),  $^{13}\text{C}$  NMR ( $\text{CDCl}_3$ ,  $\delta$  77.0; acetone- $d_6$   $\delta$  29.84, 206.26). Data are reported as follows: chemical shift, multiplicity (s = singlet, d = doublet, t = triplet, q = quartet, m = multiplet, br = broad), coupling constants (Hz) and integration. High resolution mass spectra (HRMS) were obtained on a Bruker Daltonics Solarix 7.0 Tesla Fourier Transform Ion Cyclotron Resonance (FT-ICR analyzer) Mass Spectrometer using the electrospray ionization (ESI) technique. Reactions carried out at elevated temperature were heated using an oil bath.

## 2. Detection of the intermediates by ESI-HRMS and $^1\text{H}$ NMR analysis

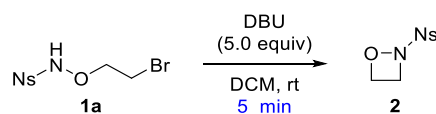

To a solution of **1a** (33 mg, 0.1 mmol, 1.0 equiv) in DCM (1 mL) was added dropwise of DBU (76 mg, 0.5 mmol, 5.0 equiv) at room temperature. The reaction mixture was stirred at the same temperature for 5 min, then the solution was quenched with saturated  $\text{NH}_4\text{Cl}$  solution (3 mL). The organic layer was separated and the aqueous layer was extracted with DCM (3 mL x 3). The combined organic layer was washed with brine (3 mL), dried over  $\text{Na}_2\text{SO}_4$ , and concentrated in vacuum. The residue was purified by flash silica gel chromatography (petroleum ether/EtOAc = 3/1) to afford the product 1,2-oxazetidinium **2** (15 mg, 60% yield) as a white solid.  $^1\text{H}$  NMR

(600 MHz, CDCl<sub>3</sub>) δ 8.44 (d, *J* = 8.5 Hz, 2H), 8.22 (d, *J* = 8.5 Hz, 2H), 4.78 (t, *J* = 8.2 Hz, 2H), 4.54 (t, *J* = 8.2 Hz, 2H). The spectral data of **2** was consistent with that reported in the literature.<sup>1</sup>

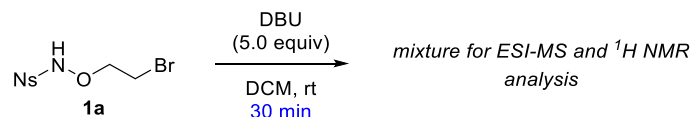

To a solution of **1a** (33 mg, 0.1 mmol, 1.0 equiv) in DCM (1 mL) was added dropwise of DBU (76 mg, 0.5 mmol, 5.0 equiv) at room temperature. After stirring at room temperature for 30 minutes, an aliquot of reaction solution was taken out and diluted with methanol. Then, the mixture was immediately subjected to mass spectra analysis. The ESI-HRMS data was acquired and recorded on a 7 Tesla Solarix FT-ICR mass spectrometer (Bruker Daltonics, Bremen, Germany). By analyzing the data, we assigned the plausible structures of four species **S1-S4** as following (**Figure S1**). They all should derive from a Ns-NHCH<sub>2</sub>OCH<sub>3</sub> precursor, indicating that the formaldimine [H<sub>2</sub>C=N-Ns] intermediate might be formed in the reaction mixture.

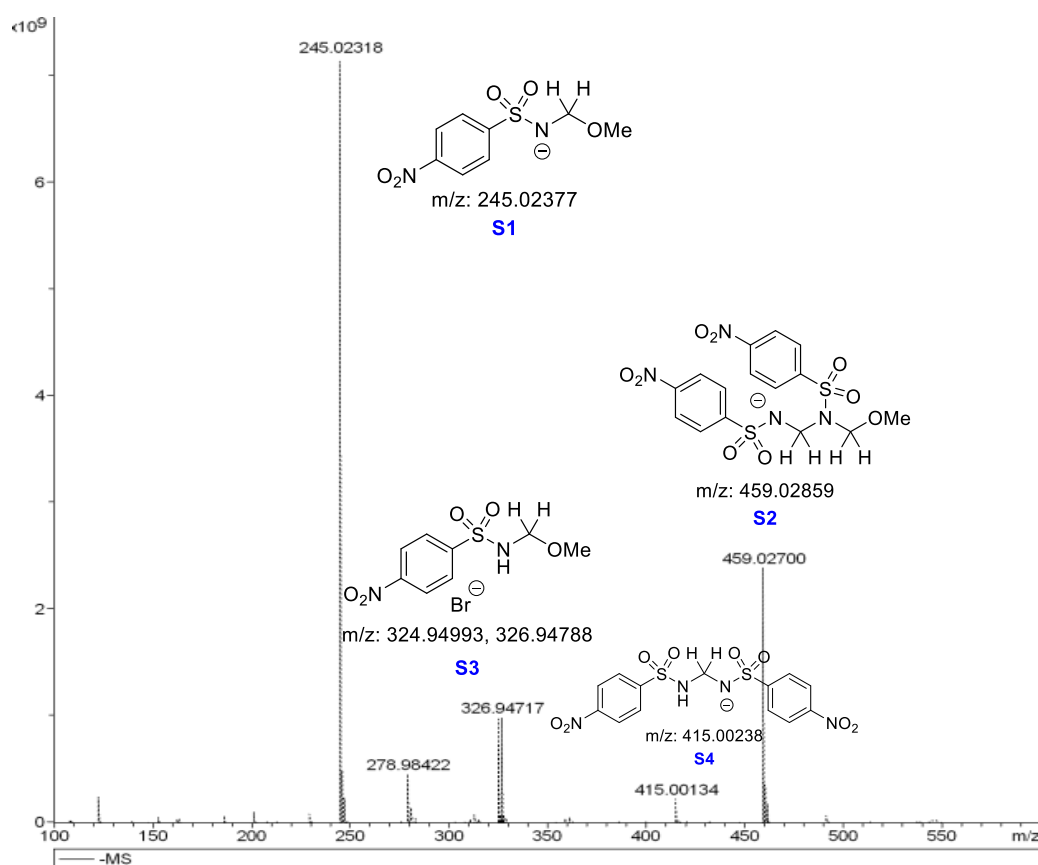

**Figure S1. ESI-HRMS data of the reaction mixture (in CH<sub>3</sub>OH).**

To further confirm the structures of the above **S1-S4**, the reaction mixture was subjected to the mass spectra analysis in CD<sub>3</sub>OD solvent (**Figure S2**). Again, the ESI-HRMS data were consistent with the above assigned structures.

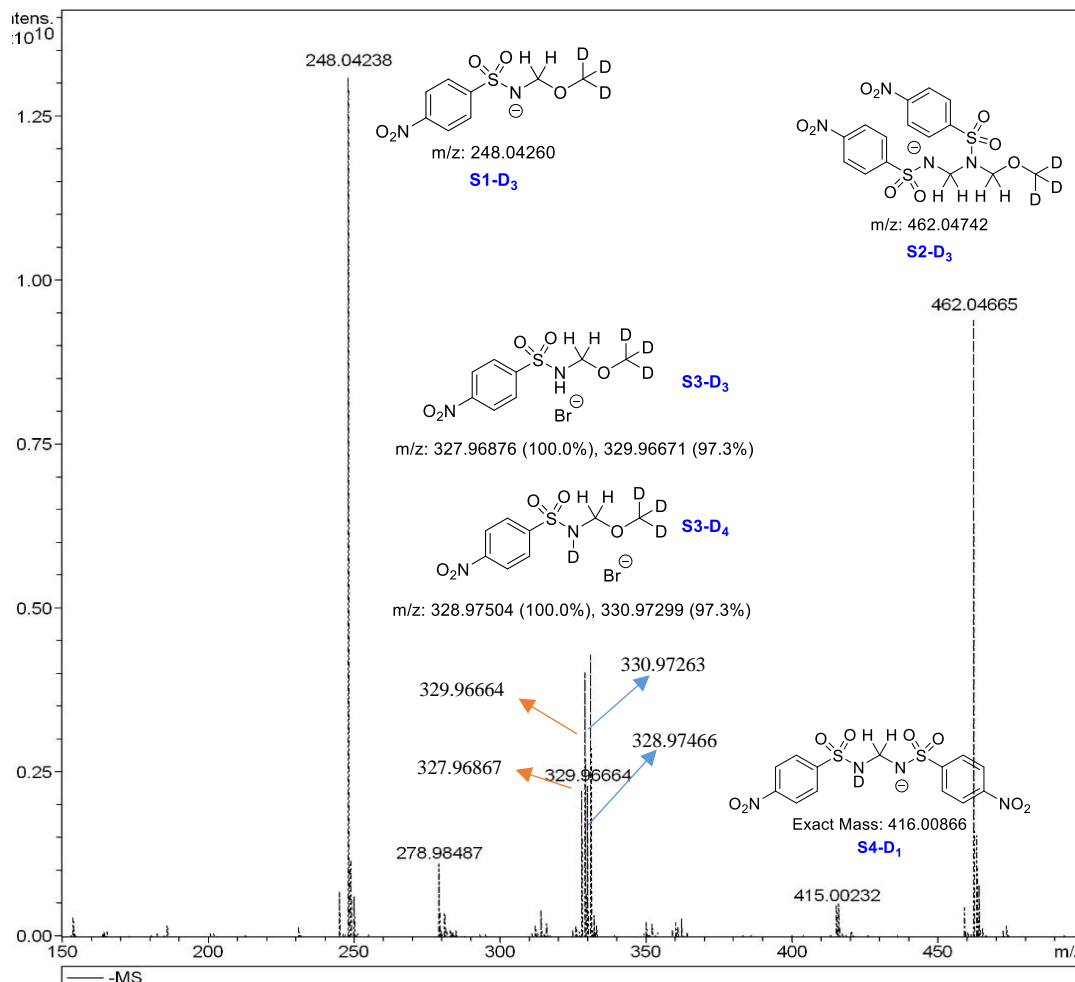

**Figure S2. ESI-HRMS data of the reaction mixture (in CD<sub>3</sub>OD).**

Meanwhile, to gain details of the reaction process, hydroxylamine **1a** (1.0 equiv) and DBU (5.0 equiv) were dissolved in CDCl<sub>3</sub>. Then the <sup>1</sup>H NMR spectra of the mixture were recorded at 1 min, 5 min, and 30 min, respectively. As shown in **Figure S3**, a large amount of 1,2-oxazetidine **2** was rapidly generated just after 1 min of the reaction, and the starting material **1a** was almost fully converted to compound **2** after 5 min the reaction. However, when the reaction was extended to 30 min, compound **1a** was finally degraded to nosylamide.

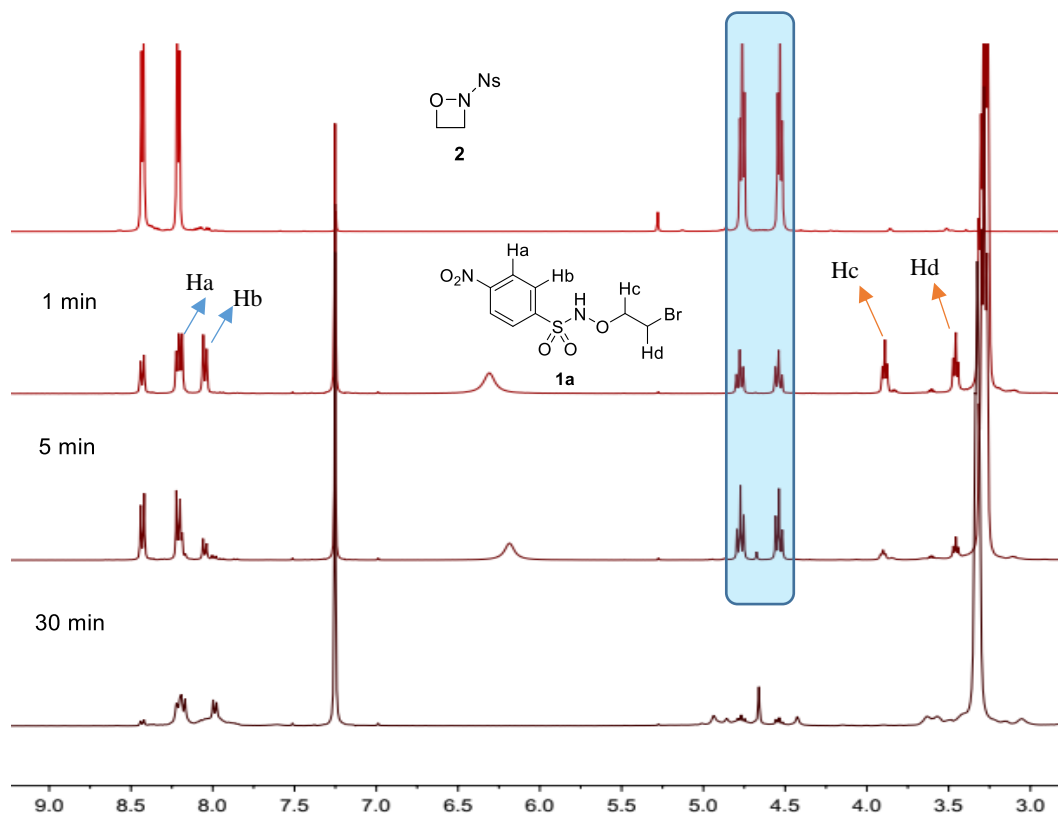

**Figure S3.** <sup>1</sup>H NMR spectra of the reaction mixture (in CDCl<sub>3</sub>).

The final product nosylamide was isolated and identified by <sup>1</sup>H NMR spectra. The whole fragmentation process could also be clearly monitored by TLC method (Figure S4).

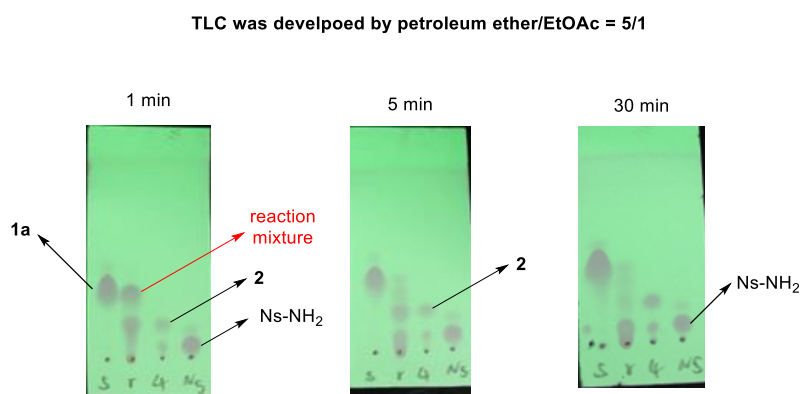

**Figure S4.** Detection of the intermediates by TLC analysis.

According to the above data and observation, we deduced that *N*-nosyl-*O*-bromoethyl hydroxylamine **1a** rapidly generated the four-membered 1,2-oxazetidine **2** within 5 minutes of the reaction. Then compound **2** probably could in situ generate the formaldimine [H<sub>2</sub>C=N-Ns] intermediate in the presence of DBU

base. This intermediate is also highly unstable, which could be finally decomposed to nosylamide.

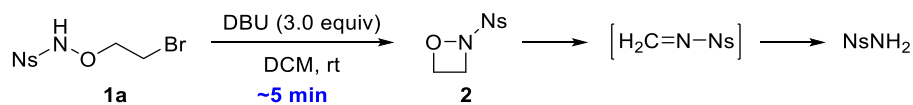

### 3. Optimization of the reaction conditions

**Table S1. Screening of the bases and solvents<sup>a</sup>**

| entry | Base                                  | solvent            | t (h) | yield (%) <sup>b</sup> |
|-------|---------------------------------------|--------------------|-------|------------------------|
| 1     | K <sub>2</sub> CO <sub>3</sub> (50%)  | DMF                | 24    | 47                     |
| 2     | Cs <sub>2</sub> CO <sub>3</sub> (50%) | DMF                | 4     | 73                     |
| 3     | CsOH (50%)                            | DMF                | 4     | 54                     |
| 4     | K <sub>2</sub> CO <sub>3</sub> (s)    | DMF                | 24    | 35                     |
| 5     | Cs <sub>2</sub> CO <sub>3</sub> (s)   | DMF                | 4     | 71                     |
| 6     | CsOH (s)                              | DMF                | 4     | 60                     |
| 7     | DBU                                   | DMF                | 1     | 78                     |
| 8     | TMG                                   | DMF                | 1     | 75                     |
| 9     | DBU                                   | DCM                | 1     | 85                     |
| 10    | Pyridine                              | DCM                | 24    | 0                      |
| 11    | TEA                                   | DCM                | 24    | 0 <sup>c</sup>         |
| 12    | DBU                                   | PhMe               | 4     | 51                     |
| 13    | DBU                                   | Ethyl acetate      | 4     | 72                     |
| 14    | DBU                                   | THF                | 4     | 63                     |
| 15    | DBU                                   | CH <sub>3</sub> CN | 4     | 69                     |

<sup>a</sup>Reaction conditions: **1a** (0.10 mmol), **3a** (0.20 mmol) and base (0.30 mmol) in indicated solvent. <sup>b</sup>Isolated yield. <sup>c</sup>1,2-Oxazetidine was formed.

**Table S2. Screening of other reaction parameters<sup>a</sup>**

| entry | 3a:1a   | T (°C) | t (h) | yield (%) <sup>b</sup> |
|-------|---------|--------|-------|------------------------|
| 1     | 2.5 : 1 | rt     | 1     | 84                     |
| 2     | 2 : 1   | rt     | 1     | 85                     |
| 3     | 1.5 : 1 | rt     | 1     | 81                     |
| 4     | 1 : 1   | rt     | 1     | 60                     |
| 5     | 1 : 1.5 | rt     | 1     | 34                     |
| 6     | 2 : 1   | 0      | 24    | 68                     |
| 7     | 2 : 1   | 40     | 1     | 59                     |

<sup>a</sup>Reaction conditions: **1a**, **3a** and DBU (3.0 equiv) in DCM. <sup>b</sup>Isolated yield.

**Table S3. Screening of hydroxylamines<sup>a</sup>**

| entry | substrates | base              | solvent | t (h) | yield (%) <sup>b</sup> |
|-------|------------|-------------------|---------|-------|------------------------|
| 1     | <b>1a</b>  | DBU               | DCM     | 1     | 85                     |
| 2     | <b>1b</b>  | DBU               | DCM     | 24    | 0 <sup>c</sup>         |
| 3     | <b>1b</b>  | CsOH              | DMF     | 24    | 0                      |
| 4     | <b>1b</b>  | <sup>t</sup> BuOK | THF     | 24    | 0 <sup>d</sup>         |
| 5     | <b>1c</b>  | DBU               | DCM     | 24    | 0                      |
| 6     | <b>1c</b>  | CsOH              | DMF     | 24    | 0                      |
| 7     | <b>1c</b>  | <sup>t</sup> BuOK | THF     | 24    | 0 <sup>c</sup>         |
| 8     | <b>1e</b>  | DBU               | DCM     | 1     | 72                     |
| 9     | <b>1e</b>  | CsOH              | DMF     | 1     | 46                     |
| 10    | <b>1e</b>  | <sup>t</sup> BuOK | THF     | 24    | 0 <sup>d</sup>         |

<sup>a</sup>Reaction conditions: **1** (0.10 mmol), **3a** (0.2 mmol) and base (0.30 mmol) in indicated solvent. <sup>b</sup>Isolated yield. <sup>c</sup>1,2-Oxazetidine was formed. <sup>d</sup>Decomposition of the starting materials.

## 4. General procedure for the preparation of nucleophile substrates

### 4.1. General procedure for the preparation of $\beta$ -keto esters **3**

Compounds **3j**, **3m**, **3p** are commercial available. Other known carbonyl substrates were prepared as following procedures.

#### 4.1.1 Method A: preparation of $\beta$ -keto esters **3a-i**, **3l**, and **3n**<sup>2</sup>

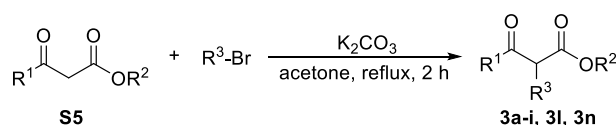

A mixture of **S5** (3 ~ 20 mmol, 1.0 equiv) and anhydrous  $K_2CO_3$  (1.5 equiv) in acetone was stirred at room temperature for five minutes. Then, methyl iodide or corresponding bromide (2.0 equiv) was added carefully. The reaction mixture was heated to refluxed in an oil bath until the completion of the reaction as monitored by TLC. After the mixture was cooled to room temperature, the precipitate was filtered off and the solvent was removed under vacuum. The crude mixture was purified by column chromatography (petroleum ether/EtOAc = 200/1 ~ 20/1) to afford the

products **3a-i**, **3l** and **3n** in 48-92% yields.

#### 4.1.2 Method B: preparation of $\beta$ -keto ester **3k**<sup>3</sup>

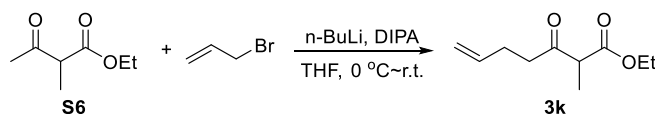

Diisopropylamine (22 mmol, 2.2 equiv) was dissolved in dry tetrahydrofuran (40 mL) and the solution cooled to  $0\text{ }^\circ\text{C}$ .  $n$ -Butyllithium (22 mmol, 2.2 equiv., 2.5 M solution in  $n$ -hexane) was slowly added and the reaction mixture was stirred at room temperature for 30 minutes and afterwards cooled to  $0\text{ }^\circ\text{C}$ .  $\beta$ -ketoester **S6** (10 mmol, 1.0 equiv) was dissolved in dry tetrahydrofuran (5 mL) and slowly added to the solution. The reaction mixture was stirred for 15 minutes after which allyl bromide (12 mmol, 1.2 equiv) was added. The solution was allowed to stir at  $0\text{ }^\circ\text{C}$  for 30 minutes and at room temperature for 90 minutes. The reaction mixture was quenched with saturated ammonium chloride (20 mL) and extracted with EtOAc (30 mL x 3). The combined organic layers were washed with brine (20 mL), dried over anhydrous  $\text{Na}_2\text{SO}_4$  and the solvent was evaporated in vacuo. The crude mixture was purified by column chromatography (petroleum ether/EtOAc = 50/1) to afford the product **3k** as a colorless oil (550 mg, 30% yield).

#### 4.1.3 Method C: preparation of $\beta$ -keto ester **3o**<sup>4</sup>

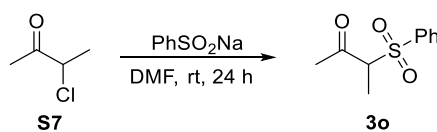

To a solution of  $\alpha$ -haloketone **S7** (10 mmol, 1.0 equiv) in DMF (20 mL) was added sodium benzenesulfinate (10 mmol, 1.0 equiv) in one portion and the reaction mixture was stirred at room temperature for 24 h. The reaction was stopped by the addition of water (30 mL) and extracted with EtOAc (30 mL x 3). The combined organic layers were washed with brine (20 mL), dried with  $\text{NaSO}_4$  and the solvent was removed under reduced pressure. The crude mixture was purified by column chromatography (petroleum ether/EtOAc = 10/1) to afford the product **3o** as a white solid (1.71 g, 81% yield).



#### 4.1.4 Method D: preparation of $\beta$ -keto esters **3q-u**<sup>5</sup>

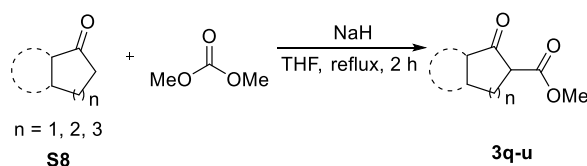

To a suspension of NaH (2.1 equiv) in THF (50 mL) was added dimethyl carbonate (5.0 equiv) at room temperature. The mixture was stirred for 5 minutes and then ketone **S8** (3 ~ 20 mmol, 1.0 equiv) in THF (30 mL) was added dropwise. The reaction mixture was heated to refluxed in an oil bath until the completion of the reaction as monitored by TLC. The resulting mixture was then cooled to 0 °C and 1 M HCl was added until the solution became neutral. The mixture was then poured into water (30 mL) and extracted with EtOAc (30 mL x 3). The combined organic layers were washed with brine (20 mL), dried over anhydrous Na<sub>2</sub>SO<sub>4</sub> and concentrated in vacuum. The crude mixture was purified by column chromatography (petroleum ether/EtOAc = 200/1 ~ 100/1) to afford the products **3q-u** in 70-88% yields.

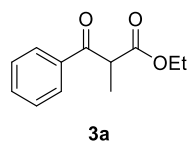

Following the general method A, **3a** was obtained by flash column chromatography (petroleum ether/EtOAc = 200/1) as a colorless oil (1.9 g, 92% yield). <sup>1</sup>H NMR (400 MHz, CDCl<sub>3</sub>)  $\delta$  7.93 (d,  $J = 7.5$  Hz, 2H), 7.52 (t,  $J = 7.3$  Hz, 1H), 7.42 (t,  $J = 7.6$  Hz, 2H), 4.35 (q,  $J = 7.1$  Hz, 1H), 4.09 (q,  $J = 7.1$  Hz, 2H), 1.44 (d,  $J = 7.2$  Hz, 3H), 1.11 (t,  $J = 7.2$  Hz, 3H). The spectral data of **3a** was consistent with that reported in the literature.<sup>6</sup>

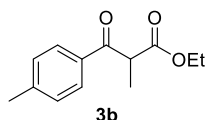

Following the general method A, **3b** was obtained by flash column chromatography (petroleum ether/EtOAc = 100/1) as a colorless oil (363 mg, 55% yield). <sup>1</sup>H NMR (400 MHz, CDCl<sub>3</sub>)  $\delta$  7.88 (d,  $J = 8.1$  Hz, 2H), 7.27 (d,  $J = 8.1$  Hz,

2H), 4.35 (q,  $J = 7.1$  Hz, 1H), 4.14 (q,  $J = 7.1$  Hz, 2H), 2.41 (s, 3H), 1.47 (d,  $J = 7.1$  Hz, 3H), 1.17 (t,  $J = 7.1$  Hz, 3H). The spectral data of **3b** was consistent with that reported in the literature.<sup>6</sup>

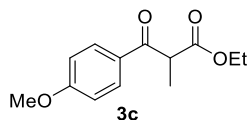

Following the general method A, **3c** was obtained by flash column chromatography (petroleum ether/EtOAc = 50/1) as a colorless oil (1.07 g, 91% yield). <sup>1</sup>H NMR (400 MHz, CDCl<sub>3</sub>)  $\delta$  7.97 (d,  $J = 8.9$  Hz, 2H), 6.94 (d,  $J = 8.9$  Hz, 2H), 4.33 (q,  $J = 7.1$  Hz, 1H), 4.14 (q,  $J = 7.2$  Hz, 2H), 3.87 (s, 3H), 1.47 (d,  $J = 7.1$  Hz, 3H), 1.18 (t,  $J = 7.2$  Hz, 3H). The spectral data of **3c** was consistent with that reported in the literature.<sup>7</sup>

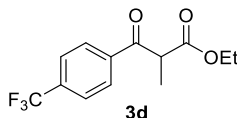

Following the general method A, **3d** was obtained by flash column chromatography (petroleum ether/EtOAc = 30/1) as a colorless oil (1.02 g, 74% yield). <sup>1</sup>H NMR (400 MHz, CDCl<sub>3</sub>)  $\delta$  8.07 (d,  $J = 8.2$  Hz, 2H), 7.74 (d,  $J = 8.2$  Hz, 2H), 4.36 (q,  $J = 7.1$  Hz, 1H), 4.14 (q,  $J = 7.1$  Hz, 2H), 1.50 (d,  $J = 7.1$  Hz, 3H), 1.16 (t,  $J = 7.1$  Hz, 3H). The spectral data of **3d** was consistent with that reported in the literature.<sup>8</sup>

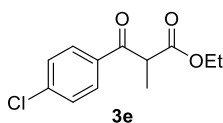

Following the general method A, **3e** was obtained by flash column chromatography (petroleum ether/EtOAc = 100/1) as a colorless oil (323 mg, 67% yield). <sup>1</sup>H NMR (400 MHz, CDCl<sub>3</sub>)  $\delta$  7.92 (d,  $J = 8.5$  Hz, 2H), 7.45 (d,  $J = 8.5$  Hz, 2H), 4.31 (q,  $J = 7.0$  Hz, 1H), 4.14 (q,  $J = 7.1$  Hz, 2H), 1.48 (d,  $J = 7.1$  Hz, 3H), 1.17 (t,  $J = 7.1$  Hz, 3H). The spectral data of **3e** was consistent with that reported in the literature.<sup>9</sup>

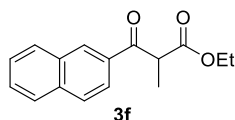

Following the general method A, **3f** was obtained by flash column chromatography (petroleum ether/EtOAc = 100/1) as a colorless oil (910 mg, 71% yield).  $^1\text{H NMR}$  (400 MHz,  $\text{CDCl}_3$ )  $\delta$  8.51 (s, 1H), 8.04 (dd,  $J = 8.7, 1.8$  Hz, 1H), 7.98 (d,  $J = 8.1$  Hz, 1H), 7.94 – 7.85 (m, 2H), 7.65 – 7.54 (m, 2H), 4.54 (q,  $J = 7.1$  Hz, 1H), 4.21 – 4.11 (m, 2H), 1.56 (d,  $J = 7.0$  Hz, 3H), 1.17 (t,  $J = 7.1$  Hz, 3H). The spectral data of **3f** was consistent with that reported in the literature.<sup>10</sup>

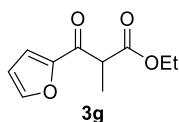

Following the general method A, **3g** was obtained by flash column chromatography (petroleum ether/EtOAc = 20/1) as a colorless oil (456 mg, 86% yield).  $^1\text{H NMR}$  (400 MHz,  $\text{CDCl}_3$ )  $\delta$  7.62 – 7.57 (m, 1H), 7.30 – 7.24 (m, 1H), 6.55 (dd,  $J = 3.6, 1.7$  Hz, 1H), 4.22 – 4.08 (m, 3H), 1.46 (d,  $J = 7.2$  Hz, 3H), 1.18 (t,  $J = 7.1$  Hz, 3H). The spectral data of **3g** was consistent with that reported in the literature.<sup>6</sup>

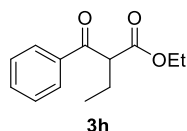

Following the general method A, **3h** was obtained by flash column chromatography (petroleum ether/EtOAc = 100/1) as a colorless oil (1.9 g, 86% yield).  $^1\text{H NMR}$  (400 MHz,  $\text{CDCl}_3$ )  $\delta$  7.99 (d,  $J = 9.3$  Hz, 2H), 7.58 (t,  $J = 7.4$  Hz, 1H), 7.47 (t,  $J = 7.7$  Hz, 2H), 4.25 – 4.09 (m, 3H), 2.09 – 1.98 (m, 2H), 1.17 (t,  $J = 7.1$  Hz, 3H), 0.99 (t,  $J = 7.4$  Hz, 3H). The spectral data of **3h** was consistent with that reported in the literature.<sup>9</sup>

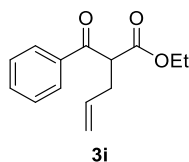

Following the general method A, **3i** was obtained by flash column chromatography (petroleum ether/EtOAc = 100/1) as a colorless oil (3.3 g, 72% yield).  $^1\text{H NMR}$  (400 MHz,  $\text{CDCl}_3$ )  $\delta$  7.99 (d,  $J = 7.5$  Hz, 2H), 7.58 (t,  $J = 7.3$  Hz, 1H), 7.47 (t,  $J = 7.6$  Hz, 2H), 5.88 – 5.73 (m, 1H), 5.16 – 4.96 (m, 2H), 4.39 (t,  $J = 7.2$  Hz, 1H), 4.17 – 4.09 (m, 2H), 2.83 – 2.70 (m, 2H), 1.16 (t,  $J = 7.1$  Hz, 3H). The spectral data of **3i** was consistent with that reported in the literature.<sup>10</sup>

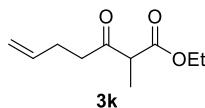

Following the general method B, **3k** was obtained by flash column chromatography (petroleum ether/EtOAc = 50/1) as a colorless oil (550 mg, 30% yield).  $^1\text{H NMR}$  (400 MHz,  $\text{CDCl}_3$ )  $\delta$  5.91 – 5.69 (m, 1H), 5.08 – 4.94 (m, 2H), 4.19 (q,  $J = 7.2$  Hz, 2H), 3.51 (q,  $J = 7.1$  Hz, 1H), 2.76 – 2.52 (m, 2H), 2.42 – 2.25 (m, 2H), 1.33 (d,  $J = 7.1$  Hz, 3H), 1.27 (t,  $J = 7.1$  Hz, 3H). The spectral data of **3k** was consistent with that reported in the literature.<sup>3</sup>

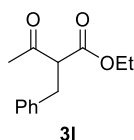

Following the general method A, **3l** was obtained by flash column chromatography (petroleum ether/EtOAc = 50/1) as a colorless oil (1.25 g, 57% yield).  $^1\text{H NMR}$  (400 MHz,  $\text{CDCl}_3$ )  $\delta$  7.31 – 7.14 (m, 5H), 4.14 (q,  $J = 7.7$  Hz, 2H), 3.78 (t,  $J = 7.6$  Hz, 1H), 3.16 (d,  $J = 7.7$  Hz, 2H), 2.18 (s, 3H), 1.19 (t,  $J = 7.7$  Hz, 3H). The spectral data of **3l** was consistent with that reported in the literature.<sup>11</sup>

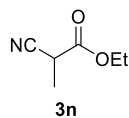

Following the general method A, **3n** was obtained by flash column chromatography (petroleum ether/EtOAc = 100/1) as a colorless oil (621 mg, 48% yield).  $^1\text{H NMR}$  (400 MHz,  $\text{CDCl}_3$ )  $\delta$  4.27 (q,  $J = 7.1$  Hz, 2H), 3.54 (q,  $J = 7.4$  Hz, 1H), 1.59 (d,  $J = 7.4$  Hz, 3H), 1.32 (t,  $J = 7.1$  Hz, 3H). The spectral data of **3n** was consistent with that reported in the literature.<sup>12</sup>

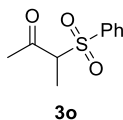

Following the general method C, **3o** was obtained by flash column chromatography (petroleum ether/EtOAc = 10/1) as a white solid (1.71 g, 81% yield).  $^1\text{H NMR}$  (400 MHz,  $\text{CDCl}_3$ )  $\delta$  7.78 (d,  $J = 8.2$  Hz, 2H), 7.66 (t,  $J = 7.4$  Hz, 1H), 7.54 (t,  $J = 7.6$  Hz, 2H), 4.16 (q,  $J = 7.0$  Hz, 1H), 2.41 (s, 3H), 1.37 (d,  $J = 6.9$  Hz, 3H). The spectral data of **3o** was consistent with that reported in the literature.<sup>4</sup>

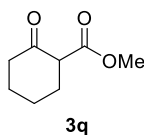

Following the general method D, **3q** was obtained by flash column chromatography (petroleum ether/EtOAc = 200/1) as a colorless oil (2.3 g, 74% yield).  $^1\text{H NMR}$  (400 MHz,  $\text{CDCl}_3$ )  $\delta$  12.16 (s, 1H), 3.75 (s, 3H), 2.32 – 2.17 (m, 3H), 1.76 – 1.54 (m, 5H). The spectral data of **3q** was consistent with that reported in the literature.<sup>13</sup>

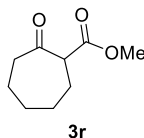

Following the general method D, **3r** was obtained by flash column chromatography (petroleum ether/EtOAc = 200/1) as a colorless oil (357 mg, 70% yield, keto/enol form = 2.8/1).  $^1\text{H NMR}$  (400 MHz,  $\text{CDCl}_3$ )  $\delta$  12.65 (s, 0.26H), 3.75 – 3.68 (m, 3H), 3.54 (dd,  $J = 10.4, 4.0$  Hz, 0.7H), 2.68 – 2.50 (m, 1.2H), 2.46 – 2.31 (m, 1.21H), 2.16 – 2.03 (m, 0.73H), 2.01 – 1.76 (m, 3H), 1.77 – 1.65 (m, 0.75H), 1.65 – 1.51 (m, 1.27H), 1.52 – 1.35 (m, 2H). The spectral data of **3r** was consistent with that reported in the literature.<sup>13</sup>

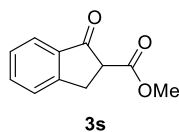

Following the general method D, **3s** was obtained by flash column chromatography (petroleum ether/EtOAc = 100/1) as a brown solid (1.56 g, 82%

yield).  $^1\text{H NMR}$  (400 MHz,  $\text{CDCl}_3$ )  $\delta$  7.76 (d,  $J = 7.6$  Hz, 1H), 7.61 (t,  $J = 7.5$  Hz, 1H), 7.49 (d,  $J = 7.7$  Hz, 1H), 7.38 (t,  $J = 7.3$  Hz, 1H), 3.80 – 3.69 (m, 4H), 3.60 – 3.47 (m, 1H), 3.37 (dd,  $J = 17.3, 8.3$  Hz, 1H). The spectral data of **3s** was consistent with that reported in the literature.<sup>14</sup>

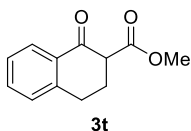

Following the general method D, **3t** was obtained by flash column chromatography (petroleum ether/EtOAc = 100/1) as a pale yellow oil (3.6 g, 88% yield, keto/enol form = 1/1).  $^1\text{H NMR}$  (400 MHz,  $\text{CDCl}_3$ )  $\delta$  12.41 (s, 0.5H), 8.04 (d,  $J = 7.7$  Hz, 0.58H), 7.85 – 7.75 (m, 0.49H), 7.49 (t,  $J = 7.5$  Hz, 0.61H), 7.37 – 7.21 (m, 2H), 7.17 (d,  $J = 7.2$  Hz, 0.42H), 3.82 (s, 1.4H), 3.78 (s, 1.6H), 3.63 (dd,  $J = 10.6, 4.6$  Hz, 0.49H), 3.13 – 2.93 (m, 1.26H), 2.81 (t,  $J = 7.6$  Hz, 1H), 2.62 – 2.42 (m, 1.43H), 2.43 – 2.30 (m, 0.52H). The spectral data of **3t** was consistent with that reported in the literature.<sup>14</sup>

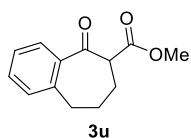

Following the general method D, **3u** was obtained by flash column chromatography (petroleum ether/EtOAc = 100/1) as a pale yellow oil (471 mg, 72% yield).  $^1\text{H NMR}$  (400 MHz,  $\text{CDCl}_3$ )  $\delta$  12.61 (s, 1H), 7.62 (dd,  $J = 6.5, 2.5$  Hz, 1H), 7.39 – 7.28 (m, 2H), 7.25 – 7.17 (m, 1H), 3.82 (s, 1.44H), 3.78 (s, 1.56H), 2.64 (t,  $J = 6.6$  Hz, 2H), 2.19 – 2.02 (m, 4H). The spectral data of **3u** was consistent with that reported in the literature.<sup>14</sup>

## 4.2 General procedure for the preparation of $\alpha$ -substituted ketones **5**

### 4.2.1 Method E: preparation of $\alpha$ -substituted ketones **5a-b** and **5d-i**<sup>15</sup>

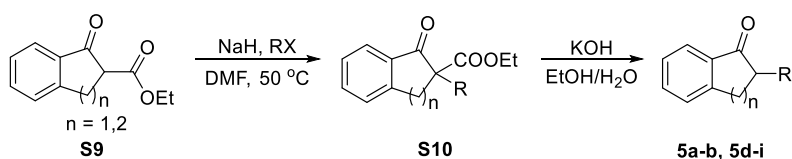

To a solution of **S9** (5 ~ 23 mmol, 1.0 equiv) in dry DMF (12 mL) was added

NaH (60% in oil, 10 mmol, 2.0 equiv), the solution was stirred at room temperature for 30 minutes and methyl iodide (15 mmol, 3.0 equiv) was added. The reaction was stirred at 50 °C in an oil bath for 3h. After completion, the reaction mixture was cooled, quenched with a saturated NH<sub>4</sub>Cl aqueous solution (15 mL) and the product was extracted with EtOAc (20 mL × 3). The combined organic layers were washed with brine (20 mL), dried over anhydrous Na<sub>2</sub>SO<sub>4</sub> and concentrated in vacuum. The residue was used in the next step without further purification.

The crude **S10** was dissolved in EtOH/H<sub>2</sub>O (5/1, 22 mL). After adding KOH (12.5 mmol, 2.5 equiv), the reaction mixture was heated to reflux in an oil bath for 2 hours. The residue was neutralized with a saturated NH<sub>4</sub>Cl aqueous solution (10 mL), the volatiles were removed under vacuum, and the resulting aqueous layer was extracted with EtOAc (20 mL × 3). The combined organic layers were washed with brine (20 mL), dried over Na<sub>2</sub>SO<sub>4</sub> and concentrated in vacuum. The residue was purified by flash chromatography (petroleum ether/EtOAc = 300/1 ~ 100/1) to afford **5a-b**, **5d-i** in 30-81% overall yields.

#### 4.2.2 Method F: preparation of $\alpha$ -substituted ketone **5c**<sup>16</sup>

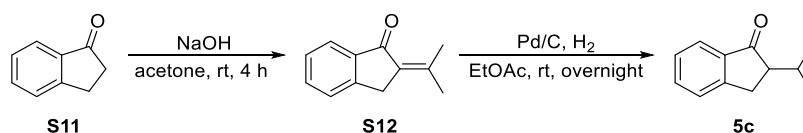

To a solution of **S11** (1.32 g, 10.0 mmol) in anhydrous acetone (20 mL), NaOH (132 mg, 3.3 mmol) was added. The mixture was stirred at room temperature for 4 h and then neutralized with 1 N HCl. Acetone was removed by distillation, after adding water (20 mL) and EtOAc (30 mL), the mixture was partitioned. The organic layer was washed with brine (20 mL), dried over anhydrous Na<sub>2</sub>SO<sub>4</sub>, and concentrated in vacuum. The residue was purified by flash chromatography (petroleum ether/EtOAc = 80/1) to afford **S12**.

To a solution of **S12** (1.44 g, 10 mmol) in EtOAc (20 mL), 10% Pd/C (20% weight of compound **S12**) was added. The mixture was stirred overnight under a hydrogen atmosphere at room temperature. Insoluble materials were removed by

filtration and washed with EtOAc. The filtrate was evaporated to dryness under reduced pressure. The residue was purified by flash chromatography (petroleum ether/EtOAc = 30/1) to afford **5c** in 35% overall yield.

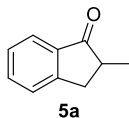

Following the general method E, **5a** was obtained by flash column chromatography (petroleum ether/EtOAc = 100/1) as a colorless oil (314 mg, 43% yield). <sup>1</sup>H NMR (400 MHz, CDCl<sub>3</sub>) δ 7.73 (d, *J* = 7.6 Hz, 1H), 7.56 (t, *J* = 7.4 Hz, 1H), 7.43 (d, *J* = 7.7 Hz, 1H), 7.34 (t, *J* = 7.4 Hz, 1H), 3.43 – 3.32 (m, 1H), 2.76 – 2.63 (m, 2H), 1.29 (dd, *J* = 7.2, 1.2 Hz, 3H). The spectral data of **5a** was consistent with that reported in the literature.<sup>17</sup>

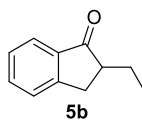

Following the general method E, **5b** was obtained by flash column chromatography (petroleum ether/EtOAc = 100/1) as a colorless oil (320 mg, 40% yield). <sup>1</sup>H NMR (400 MHz, CDCl<sub>3</sub>) δ 7.75 (d, *J* = 7.6 Hz, 1H), 7.58 (t, *J* = 7.4 Hz, 1H), 7.46 (d, *J* = 7.6 Hz, 1H), 7.36 (t, *J* = 7.4 Hz, 1H), 3.32 (dd, *J* = 17.2, 7.9 Hz, 1H), 2.82 (dd, *J* = 17.2, 3.9 Hz, 1H), 2.67 – 2.57 (m, 1H), 2.05 – 1.90 (m, 1H), 1.60 – 1.46 (m, 1H), 1.01 (t, *J* = 7.4 Hz, 3H). The spectral data of **5b** was consistent with that reported in the literature.<sup>17</sup>

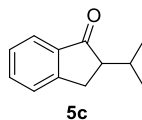

Following the general method F, **5c** was obtained by flash column chromatography (petroleum ether/EtOAc = 30/1) as a colorless oil (610 mg, 35% yield). <sup>1</sup>H NMR (400 MHz, CDCl<sub>3</sub>) δ 7.70 (d, *J* = 7.6 Hz, 1H), 7.53 (t, *J* = 7.0 Hz, 1H), 7.43 (d, *J* = 7.7 Hz, 1H), 7.30 (t, *J* = 7.4 Hz, 1H), 3.10 (dd, *J* = 17.4, 8.1 Hz, 1H), 2.89 (dd, *J* = 17.5, 4.0 Hz, 1H), 2.62 (dt, *J* = 8.3, 4.2 Hz, 1H), 2.46 – 2.30 (m, 1H), 1.01 (d, *J* = 6.9 Hz, 3H), 0.75 (d, *J* = 6.8 Hz, 3H). The spectral data of **5c** was



consistent with that reported in the literature.<sup>16</sup>

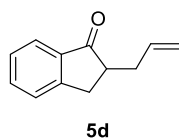

Following the general method E, **5d** was obtained by flash column chromatography (petroleum ether/EtOAc = 100/1) as a colorless oil (258 mg, 30% yield). <sup>1</sup>H NMR (400 MHz, CDCl<sub>3</sub>) δ 7.75 (d, *J* = 7.6 Hz, 1H), 7.58 (t, *J* = 8.0 Hz, 1H), 7.45 (d, *J* = 7.6 Hz, 1H), 7.36 (t, *J* = 7.8 Hz, 1H), 5.87 – 5.72 (m, 1H), 5.16 – 5.00 (m, 2H), 3.28 (dd, *J* = 17.3, 7.7 Hz, 1H), 2.86 (dd, *J* = 17.3, 3.8 Hz, 1H), 2.81 – 2.64 (m, 2H), 2.32 – 2.19 (m, 1H). The spectral data of **5d** was consistent with that reported in the literature.<sup>18</sup>

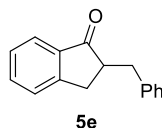

Following the general method E, **5e** was obtained by flash column chromatography (petroleum ether/EtOAc = 100/1) as a colorless oil (378 mg, 34% yield). <sup>1</sup>H NMR (400 MHz, CDCl<sub>3</sub>) δ 7.79 (d, *J* = 7.5 Hz, 1H), 7.57 (t, *J* = 7.1 Hz, 1H), 7.45 – 7.34 (m, 2H), 7.34 – 7.19 (m, 5H), 3.44 – 3.37 (m, 1H), 3.17 (dd, *J* = 17.3, 7.5 Hz, 1H), 3.07 – 2.95 (m, 1H), 2.92 – 2.82 (m, 1H), 2.75 – 2.59 (m, 1H). The spectral data of **5e** was consistent with that reported in the literature.<sup>15</sup>

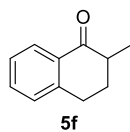

Following the general method E, **5f** was obtained by flash column chromatography (petroleum ether/EtOAc = 100/1) as a colorless oil (288 mg, 36% yield). <sup>1</sup>H NMR (400 MHz, CDCl<sub>3</sub>) δ 8.01 (d, *J* = 7.8 Hz, 1H), 7.42 (t, *J* = 7.4 Hz, 1H), 7.26 (t, *J* = 7.5 Hz, 1H), 7.20 (d, *J* = 7.6 Hz, 1H), 3.07 – 2.87 (m, 2H), 2.62 – 2.48 (m, 1H), 2.22 – 2.07 (m, 1H), 1.91 – 1.76 (m, 1H), 1.25 (d, *J* = 6.8, 3H). The spectral data of **5f** was consistent with that reported in the literature.<sup>9</sup>

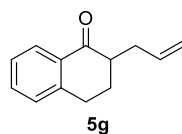

Following the general method E, **5g** was obtained by flash column chromatography (petroleum ether/EtOAc = 300/1) as a colorless oil (3.45 g, 81% yield).  $^1\text{H NMR}$  (400 MHz,  $\text{CDCl}_3$ )  $\delta$  8.03 (d,  $J = 7.8$  Hz, 1H), 7.44 (t,  $J = 7.5$  Hz, 1H), 7.28 (t,  $J = 8.2$  Hz, 1H), 7.22 (d,  $J = 7.6$  Hz, 1H), 5.91 – 5.76 (m, 1H), 5.15 – 5.03 (m, 2H), 2.98 (dd,  $J = 7.8, 4.5$  Hz, 2H), 2.81 – 2.70 (m, 1H), 2.59 – 2.47 (m, 1H), 2.32 – 2.16 (m, 2H), 1.93 – 1.77 (m, 1H). The spectral data of **5g** was consistent with that reported in the literature.<sup>19</sup>

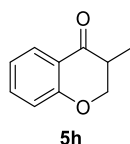

Following the general method E, **5h** was obtained by flash column chromatography (petroleum ether/EtOAc = 100/1) as a colorless oil (393 mg, 40% yield).  $^1\text{H NMR}$  (400 MHz,  $\text{CDCl}_3$ )  $\delta$  7.90 (d,  $J = 7.9$ , 1H), 7.51 – 7.42 (m, 1H), 7.01 (t,  $J = 7.4$  Hz, 1H), 6.96 (d,  $J = 8.4$  Hz, 1H), 4.50 (dd,  $J = 11.3, 5.1$  Hz, 1H), 4.20 – 4.10 (m, 1H), 2.93 – 2.80 (m, 1H), 1.22 (d,  $J = 7.0$  Hz, 3H). The spectral data of **5h** was consistent with that reported in the literature.<sup>20</sup>

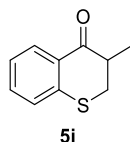

Following the general method E, **5i** was obtained by flash column chromatography (petroleum ether/EtOAc = 100/1) as a colorless oil (348 mg, 39% yield).  $^1\text{H NMR}$  (400 MHz,  $\text{CDCl}_3$ )  $\delta$  8.09 (d,  $J = 7.9$  Hz, 1H), 7.36 (t,  $J = 7.5$  Hz, 1H), 7.24 (d,  $J = 7.9$  Hz, 1H), 7.16 (t,  $J = 7.6$  Hz, 1H), 3.19 – 3.06 (m, 2H), 2.99 – 2.86 (m, 1H), 1.34 (d,  $J = 6.9$  Hz, 3H). The spectral data of **5i** was consistent with that reported in the literature.<sup>20</sup>

### 4.3. General procedure for the preparation of indanone carboxylates **7**

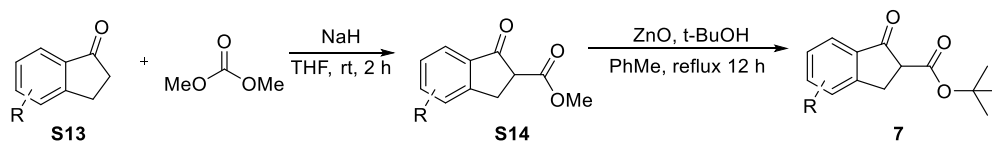

To a suspension of NaH (2.1 equiv) in THF (50 mL) were sequentially added dimethyl carbonate (5.0 equiv) and a catalytic amount of potassium *tert*-butoxide (0.1 equiv) at room temperature. The mixture was stirred for 5 min and then ketone **S13** (1.0 equiv) in THF (30 mL) was added dropwise. The reaction was stirred at room temperature until the completion of the reaction as monitored by  $^1\text{H}$  NMR. The resulting thick mixture was then cooled to 0  $^{\circ}\text{C}$  and 1 M HCl was added until the solution became neutral. The mixture was then poured into water (30 mL), extracted with EtOAc (30 mL x 3), washed with brine (20 mL), dried over anhydrous  $\text{Na}_2\text{SO}_4$  and concentrated in vacuum to afford crude **S14**.

To a flask equipped with a Dean-Stark trap and reflux condenser was added above crude **S14** (1.0 equiv), *tert*-butanol (10 equiv), ZnO (0.2 equiv) and toluene (60 mL). The mixture was heated to reflux in an oil bath until complete conversion. After the mixture was cooled to room temperature, the precipitate was filtered off and the solvent was removed under vacuum. Then the residue was purified by column chromatography (petroleum ether/EtOAc = 100/1 ~ 10/1) to afford the products **7a-l** in 32-67% yields.

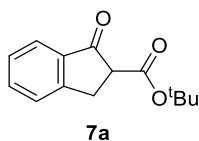

Following the general procedure starting from 1-indanone (10 mmol scale), **7a** was obtained as a pale purple oil (1.4 g, 62% yield) following flash silica gel chromatography (petroleum ether/EtOAc = 100/1).  $^1\text{H}$  NMR (400 MHz,  $\text{CDCl}_3$ )  $\delta$  7.76 (d,  $J = 7.7$  Hz, 1H), 7.61 (t,  $J = 7.4$  Hz, 1H), 7.49 (d,  $J = 7.7$  Hz, 1H), 7.38 (t,  $J = 7.5$  Hz, 1H), 3.62 (dd,  $J = 8.3, 3.9$  Hz, 1H), 3.54 – 3.45 (m, 1H), 3.33 (dd,  $J = 17.1, 8.2$  Hz, 1H), 1.49 (s, 9H). The spectral data of **7a** was consistent with that reported in the literature.<sup>1</sup>

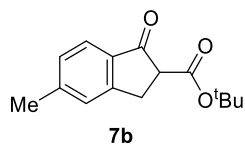

Following the general procedure starting from 5-methyl-1-indanone (6 mmol scale), **7b** was obtained as a white solid (990 mg, 67% yield) following flash silica gel chromatography (petroleum ether/EtOAc = 100/1). <sup>1</sup>H NMR (400 MHz, CDCl<sub>3</sub>) δ 7.65 (d, *J* = 7.9 Hz, 1H), 7.28 – 7.22 (m, 1H), 7.19 (d, *J* = 7.8 Hz, 1H), 3.60 (dd, *J* = 8.2, 3.9 Hz, 1H), 3.43 (dd, *J* = 17.1, 3.7 Hz, 1H), 3.27 (dd, *J* = 17.2, 8.2 Hz, 1H), 2.43 (s, 3H), 1.48 (s, 9H). The spectral data of **7b** was consistent with that reported in the literature.<sup>1</sup>

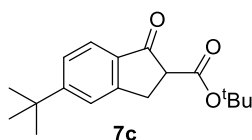

Following the general procedure starting from 5-tert-butyl-indan-1-one (15 mmol scale), **7c** was obtained as a pale purple solid (2.4 g, 56% yield) following flash silica gel chromatography (petroleum ether/EtOAc = 100/1). <sup>1</sup>H NMR (400 MHz, CDCl<sub>3</sub>) δ 7.67 (d, *J* = 8.1 Hz, 1H), 7.48 (s, 1H), 7.42 (d, *J* = 8.1 Hz, 1H), 3.59 (dd, *J* = 8.1, 3.9 Hz, 1H), 3.46 (dd, *J* = 17.0, 3.3 Hz, 1H), 3.29 (dd, *J* = 17.1, 8.2 Hz, 1H), 1.48 (s, 9H), 1.34 (s, 9H). The spectral data of **7c** was consistent with that reported in the literature.<sup>1</sup>

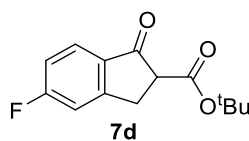

Following the general procedure starting from 5-fluoro-1-indanone (10 mmol scale), **7d** was obtained as a pale yellow solid (1.23 g, 49% yield) following flash silica gel chromatography (petroleum ether/EtOAc = 40/1). <sup>1</sup>H NMR (400 MHz, CDCl<sub>3</sub>) δ 7.75 (dd, *J* = 8.1, 5.5 Hz, 1H), 7.14 (d, *J* = 8.1 Hz, 1H), 7.08 (t, *J* = 8.3 Hz, 1H), 3.63 (dd, *J* = 8.1, 3.8 Hz, 1H), 3.48 (dd, *J* = 17.7, 3.6 Hz, 1H), 3.30 (dd, *J* = 17.4, 8.2 Hz, 1H), 1.48 (s, 9H). The spectral data of **7d** was consistent with that reported in the literature.<sup>1</sup>

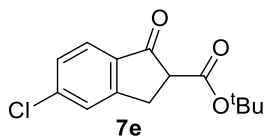

Following the general procedure starting from 5-chloro-1-indanone (10 mmol scale), **7e** was obtained as a pale purple solid (1.65 g, 62% yield) following flash silica gel chromatography (petroleum ether/EtOAc = 40/1). <sup>1</sup>H NMR (400 MHz, CDCl<sub>3</sub>) δ 7.67 (d, *J* = 8.1 Hz, 1H), 7.53 – 7.44 (m, 1H), 7.35 (d, *J* = 7.6 Hz, 1H), 3.62 (dd, *J* = 8.1, 3.7 Hz, 1H), 3.52 – 3.40 (m, 1H), 3.30 (dd, *J* = 17.4, 8.2 Hz, 1H), 1.48 (s, 9H). The spectral data of **7e** was consistent with that reported in the literature.<sup>1</sup>

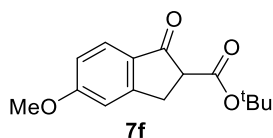

Following the general procedure starting from 5-methoxy-1-indanone (10 mmol scale), **7f** was obtained as a white solid (1.34 g, 51% yield) following flash silica gel chromatography (petroleum ether/EtOAc = 50/1). <sup>1</sup>H NMR (400 MHz, CDCl<sub>3</sub>) δ 7.64 (d, *J* = 9.0 Hz, 1H), 6.93 – 6.81 (m, 2H), 3.84 (s, 3H), 3.56 (dd, *J* = 8.0, 3.7 Hz, 1H), 3.40 (dd, *J* = 17.2, 3.1 Hz, 1H), 3.23 (dd, *J* = 17.2, 8.1 Hz, 1H), 1.45 (s, 9H). The spectral data of **7f** was consistent with that reported in the literature.<sup>1</sup>

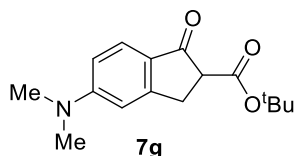

Following the general procedure starting from 5-dimethylamino-1-indanone (10 mmol scale), **7g** was obtained as a yellow solid (1.38 g, 50% yield) following flash silica gel chromatography (petroleum ether/EtOAc = 10/1). <sup>1</sup>H NMR (400 MHz, CDCl<sub>3</sub>) δ 7.61 (d, *J* = 8.8 Hz, 1H), 6.66 (dd, *J* = 8.8, 2.0 Hz, 1H), 6.56 (s, 1H), 3.55 (dd, *J* = 8.2, 3.9 Hz, 1H), 3.43 – 3.30 (m, 1H), 3.18 (dd, *J* = 17.0, 8.2 Hz, 1H), 3.08 (s, 6H), 1.48 (s, 9H). The spectral data of **7g** was consistent with that reported in the literature.<sup>1</sup>

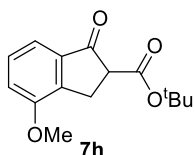

Following the general procedure starting from 4-methoxy-1-indanone (10 mmol scale), **7h** was obtained as a white solid (1.44 g, 55% yield) following flash silica gel chromatography (petroleum ether/EtOAc = 50/1). **<sup>1</sup>H NMR** (400 MHz, CDCl<sub>3</sub>) δ 7.34 – 7.29 (m, 2H), 7.05 – 6.99 (m, 1H), 3.91 (s, 3H), 3.59 (dd, *J* = 7.7, 3.5 Hz, 1H), 3.47 – 3.15 (m, 2H), 1.48 (s, 9H). The spectral data of **7h** was consistent with that reported in the literature.<sup>1</sup>

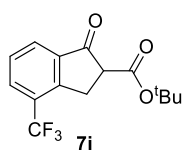

Following the general procedure starting from 4-methoxy-1-indanone (10 mmol scale), **7i** was obtained as a white solid (1.08 g, 36% yield) following flash silica gel chromatography (petroleum ether/EtOAc = 50/1). **<sup>1</sup>H NMR** (400 MHz, CDCl<sub>3</sub>) δ 7.90 – 7.78 (m, 1H), 7.73 – 7.52 (m, 1H), 7.50 – 7.37 (m, 1H), 3.67 – 3.41 (m, 3H), 1.58 – 1.42 (m, 9H). The spectral data of **7i** was consistent with that reported in the literature.<sup>21</sup>

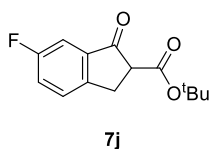

Following the general procedure starting from 6-fluoro-1-indanone (10 mmol scale), **7j** was obtained as a yellow oil (1.65 g, 66% yield) following flash silica gel chromatography (petroleum ether/EtOAc = 100/1). **<sup>1</sup>H NMR** (400 MHz, CDCl<sub>3</sub>) δ 7.44 (dd, 1H), 7.40 – 7.27 (m, 2H), 3.65 (dd, *J* = 8.2, 3.8 Hz, 1H), 3.48 – 3.38 (m, 1H), 3.28 (dd, *J* = 17.1, 8.1 Hz, 1H), 1.47 (s, 9H). The spectral data of **7j** was consistent with that reported in the literature.<sup>1</sup>

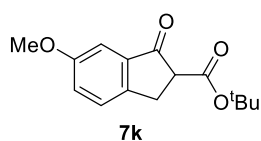

Following the general procedure starting from 6-methoxy-1-indanone (10 mmol

scale), **7k** was obtained as a white solid (1.50 g, 57% yield) following flash silica gel chromatography (petroleum ether/EtOAc = 50/1).  $^1\text{H NMR}$  (400 MHz,  $\text{CDCl}_3$ )  $\delta$  7.35 (d,  $J = 8.3$  Hz, 1H), 7.20 – 7.13 (m, 2H), 3.80 (s, 3H), 3.61 (dd,  $J = 8.0, 3.7$  Hz, 1H), 3.44 – 3.30 (m, 1H), 3.24 (dd,  $J = 16.8, 8.0$  Hz, 1H), 1.47 (s, 9H). The spectral data of **7k** was consistent with that reported in the literature.<sup>1</sup>

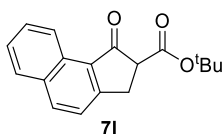

Following the general procedure starting from 2,3-dihydro-1H-cyclopenta[a]naphthalen-1-one (10 mmol scale), **7l** was obtained as a white solid (903 mg, 32% yield) following flash silica gel chromatography (petroleum ether/EtOAc = 100/1).  $^1\text{H NMR}$  (400 MHz,  $\text{CDCl}_3$ )  $\delta$  9.09 (d,  $J = 8.3$  Hz, 1H), 8.04 (t,  $J = 9.4$  Hz, 1H), 7.88 (t,  $J = 7.7$  Hz, 1H), 7.66 (t,  $J = 7.6$  Hz, 1H), 7.54 (dd,  $J = 18.4, 8.0$  Hz, 2H), 3.73 (dd,  $J = 7.8, 3.5$  Hz, 1H), 3.58 (dd,  $J = 17.5, 3.1$  Hz, 1H), 3.39 (dd,  $J = 17.6, 7.8$  Hz, 1H), 1.52 (s, 9H). The spectral data of **7l** was consistent with that reported in the literature.<sup>1</sup>

## 5. General procedure for the preparation of hydroxylamines **1**

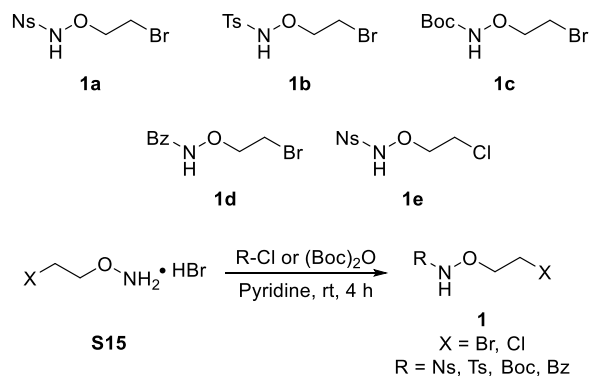

To a solution of **S15**<sup>22</sup> (1.0 equiv) in pyridine (25 mL), R-Cl or  $(\text{Boc})_2\text{O}$  (1.5 equiv) was added in three portions at 0 °C. The resulting brown suspension was warmed to rt and stirred for 4 h. After completion, the reaction mixture was poured into 1.0 M HCl solution and extracted with EtOAc (25 mL x 3). The organic solvents were combined, washed with saturated  $\text{NaHCO}_3$  (20 mL) and  $\text{H}_2\text{O}$  (20 mL), dried

over Na<sub>2</sub>SO<sub>4</sub> and concentrated. The residue was purified by column chromatography (petroleum ether/EtOAc = 6/1) to afford **1a-1e** in 37-58% yields.

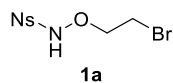

Following the general procedure described above (18 mmol scale), **1a** was obtained by flash column chromatography (petroleum ether/EtOAc = 6/1) as a yellow solid (3.4 g, 58% yield). <sup>1</sup>H NMR (400 MHz, CDCl<sub>3</sub>) δ 8.39 (d, *J* = 8.6 Hz, 2H), 8.16 (d, *J* = 8.6 Hz, 2H), 7.44 (s, 1H), 4.32 (t, *J* = 5.7 Hz, 2H), 3.56 (t, *J* = 5.7 Hz, 2H). The spectral data of **1a** was consistent with that reported in the literature.<sup>1</sup>

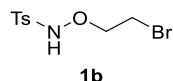

Following the general procedure described above (5 mmol scale), **1b** was obtained by flash column chromatography (petroleum ether/EtOAc = 6/1) as a yellow solid (735 mg, 50% yield). <sup>1</sup>H NMR (400 MHz, CDCl<sub>3</sub>) δ 7.83 (d, *J* = 8.2 Hz, 2H), 7.36 (d, *J* = 8.0 Hz, 2H), 6.99 (s, 1H), 4.29 (t, *J* = 5.8 Hz, 2H), 3.56 (t, *J* = 5.8 Hz, 2H), 2.46 (s, 3H). The spectral data of **1b** was consistent with that reported in the literature.<sup>23</sup>

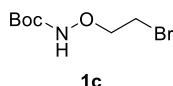

Following the general procedure described above (6.3 mmol scale), **1c** was obtained by flash column chromatography (petroleum ether/EtOAc = 6/1) as a colorless oil (562 mg, 37% yield). <sup>1</sup>H NMR (400 MHz, CDCl<sub>3</sub>) δ 7.29 (s, 1H), 4.13 (t, *J* = 6.3 Hz, 2H), 3.53 (t, *J* = 6.3 Hz, 2H), 1.47 (s, 9H). The spectral data of **1c** was consistent with that reported in the literature.<sup>23</sup>

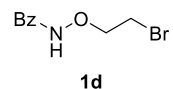

Following the general procedure described above (5.6 mmol scale), **1d** was obtained by flash column chromatography (petroleum ether/EtOAc = 100/1) as a colorless oil (700 mg, 51% yield). <sup>1</sup>H NMR (400 MHz, CDCl<sub>3</sub>) δ 9.47 (s, 1H), 7.74 (d, *J* = 7.4 Hz, 2H), 7.52 (t, *J* = 6.9 Hz, 1H), 7.41 (t, *J* = 7.4 Hz, 2H), 4.31 (t, *J* = 5.6 Hz,



2H), 3.59 (t,  $J = 5.6$  Hz, 2H). The spectral data of **1d** was consistent with that reported in the literature.<sup>23</sup>

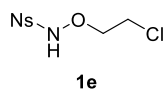

Following the general procedure described above (13.7 mmol scale), **1e** was obtained by flash column chromatography (petroleum ether/EtOAc = 6/1) as a yellow solid (1.62 g, 42% yield). <sup>1</sup>H NMR (400 MHz, CDCl<sub>3</sub>) δ 8.41 (d,  $J = 8.7$  Hz, 2H), 8.16 (d,  $J = 8.7$  Hz, 2H), 7.31 (s, 1H), 4.35 – 4.23 (m, 2H), 3.80 – 3.68 (m, 2H). <sup>13</sup>C NMR (100 MHz, CDCl<sub>3</sub>) δ 150.9, 141.7, 130.1, 124.3, 76.9, 40.9. HRMS (ESI)  $m/z$ : [M - H]<sup>-</sup> Calcd for C<sub>8</sub>H<sub>8</sub>ClN<sub>2</sub>O<sub>5</sub>S 278.9848; Found 278.9842. **Melting point:** 100.6-102.5 °C.

## 6. General procedure for the C-C bond-forming reactions

### 6. 1 General procedure for the preparation of aminomethyl products **4**

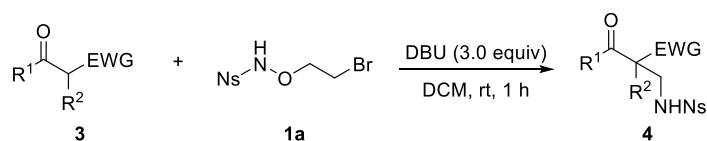

To a solution of  $\beta$ -keto esters **3** (0.4 mmol, 2.0 equiv) and DBU (91 mg, 0.6 mmol, 3.0 equiv) in DCM (1 mL) was added the solution of **1a** (65 mg, 0.2 mmol, 1.0 equiv) in DCM (1 mL) dropwise at room temperature over 10 minutes. The reaction mixture was stirred at the same temperature for 1 h. After completion, the reaction was quenched with saturated NH<sub>4</sub>Cl (2 mL). The organic layer was separated, and the aqueous layer was extracted with DCM (5 mL x 3). The combined organic layers were washed with brine (5 mL), dried over Na<sub>2</sub>SO<sub>4</sub> and concentrated in vacuum. The residue was purified by flash column chromatography (petroleum ether/EtOAc = 8/1 ~ 5/1) to afford the products **4a-u** in 65-93% yields.

**Note:** A rough range of 10% to 50% of  $\alpha$ -hydroxymethyl products were usually formed in the above Mannich reaction process. Substrates **3a**, **3c**, **3g**, **3k**, and **3t**, which produced the corresponding  $\alpha$ -hydroxymethyl products **4a'**, **4c'**, **4g'**, **4k'**, and **4t'**, were exemplified in the following section.

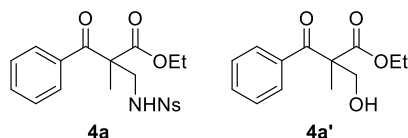

Following the general procedure described above, **4a** (major product, white solid, 71 mg, 85% yield) and **4a'** (minor product, colorless oil, 8 mg, 17% yield) were obtained by flash column chromatography (petroleum ether/EtOAc = 8/1 ~ 6/1).

Data for product **4a**:  $^1\text{H NMR}$  (400 MHz,  $\text{CDCl}_3$ )  $\delta$  8.35 (d,  $J = 8.8$  Hz, 2H), 8.04 (d,  $J = 8.8$  Hz, 2H), 7.76 (d, 2H), 7.55 (t, 1H), 7.42 (t, 2H), 5.62 (t,  $J = 6.8$  Hz, 1H), 4.29 – 4.06 (m, 2H), 3.57 – 3.32 (m, 2H), 1.60 (s, 3H), 1.09 (t,  $J = 7.1$  Hz, 3H).  $^{13}\text{C NMR}$  (100 MHz,  $\text{CDCl}_3$ )  $\delta$  197.5, 171.8, 150.0, 146.0, 134.3, 133.5, 128.8, 128.6, 128.2, 124.4, 62.3, 57.7, 49.0, 19.7, 13.7. **HRMS (ESI)**  $m/z$ :  $[\text{M} + \text{Na}]^+$  Calcd for  $\text{C}_{19}\text{H}_{20}\text{N}_2\text{NaO}_7\text{S}$  443.0883; Found 443.0872. **Melting point**: 150.3-151.4 °C.

Data for product **4a'**:  $^1\text{H NMR}$  (400 MHz,  $\text{CDCl}_3$ )  $\delta$  7.82 (d,  $J = 7.6$  Hz, 2H), 7.54 (t,  $J = 7.4$  Hz, 1H), 7.43 (t,  $J = 7.6$  Hz, 2H), 4.17 (q,  $J = 7.1$  Hz, 2H), 3.99 (m, 2H), 2.78 (s, 1H), 1.61 (s, 3H), 1.09 (t,  $J = 7.1$  Hz, 3H).  $^{13}\text{C NMR}$  (100 MHz,  $\text{CDCl}_3$ )  $\delta$  199.0, 172.8, 135.3, 133.0, 128.7, 128.5, 67.9, 61.7, 59.0, 18.8, 13.8. **HRMS (ESI)**  $m/z$ :  $[\text{M} + \text{Na}]^+$  Calcd for  $\text{C}_{13}\text{H}_{16}\text{NaO}_4$  259.0941; Found 259.0933.

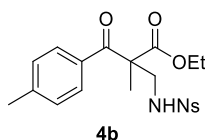

Following the general procedure described above, **4b** was obtained by flash column chromatography (petroleum ether/EtOAc = 8/1) as a white solid (70 mg, 81% yield).  $^1\text{H NMR}$  (400 MHz,  $\text{CDCl}_3$ )  $\delta$  8.33 (d,  $J = 8.4$  Hz, 2H), 8.04 (d,  $J = 8.5$  Hz, 2H), 7.65 (d,  $J = 8.0$  Hz, 2H), 7.20 (d,  $J = 8.0$  Hz, 2H), 5.68 (t,  $J = 6.7$  Hz, 1H), 4.21 – 4.09 (m, 2H), 3.51 – 3.36 (m, 2H), 2.38 (s, 3H), 1.58 (s, 3H), 1.09 (t,  $J = 7.1$  Hz, 3H).  $^{13}\text{C NMR}$  (100 MHz,  $\text{CDCl}_3$ )  $\delta$  196.9, 171.9, 149.9, 146.0, 144.6, 131.6, 129.3, 128.9, 128.2, 124.4, 62.3, 57.6, 49.0, 21.6, 19.8, 13.7. **HRMS (ESI)**  $m/z$ :  $[\text{M} + \text{Na}]^+$  Calcd for  $\text{C}_{20}\text{H}_{22}\text{N}_2\text{NaO}_7\text{S}$  457.1040; Found 457.1053. **Melting point**: 166.3-168.0 °C.

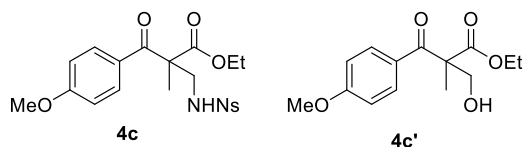

Following the general procedure described above, **4c** (major product, white solid, 70 mg, 78% yield) and **4c'** (minor product, colorless oil, 14 mg, 27% yield) were obtained by flash column chromatography (petroleum ether/EtOAc = 5/1).

Data for product **4c**: **<sup>1</sup>H NMR** (400 MHz, CDCl<sub>3</sub>) δ 8.35 (d, *J* = 8.6 Hz, 2H), 8.04 (d, *J* = 8.5 Hz, 2H), 7.76 (d, *J* = 8.8 Hz, 2H), 6.88 (d, *J* = 8.8 Hz, 2H), 5.61 (t, *J* = 6.8 Hz, 1H), 4.24 – 4.09 (m, 2H), 3.86 (s, 3H), 3.50 – 3.32 (m, 2H), 1.59 (s, 3H), 1.11 (t, *J* = 7.1 Hz, 3H). **<sup>13</sup>C NMR** (100 MHz, CDCl<sub>3</sub>) δ 195.8, 172.0, 163.8, 145.0, 146.1, 131.3, 128.2, 126.9, 124.4, 113.8, 62.3, 57.4, 55.5, 49.1, 19.9, 13.8. **HRMS (ESI)** *m/z*: [M + Na]<sup>+</sup> Calcd for C<sub>20</sub>H<sub>22</sub>N<sub>2</sub>NaO<sub>8</sub>S 473.0989; Found 473.1001. **Melting point**: 163.2-164.3 °C.

Data for product **4c'**: **<sup>1</sup>H NMR** (400 MHz, CDCl<sub>3</sub>) δ 7.82 (d, *J* = 8.8 Hz, 2H), 6.89 (d, *J* = 8.8 Hz, 2H), 4.16 (q, *J* = 7.1 Hz, 2H), 4.00 (d, *J* = 11.2 Hz, 1H), 3.93 (d, *J* = 11.2 Hz, 1H), 3.85 (s, 3H), 2.90 (s, 1H), 1.59 (s, 3H), 1.10 (t, *J* = 7.1 Hz, 3H). **<sup>13</sup>C NMR** (100 MHz, CDCl<sub>3</sub>) δ 197.2, 173.0, 163.4, 131.1, 127.9, 113.7, 67.9, 61.6, 58.6, 55.4, 18.9, 13.8. **HRMS (ESI)** *m/z*: [M + Na]<sup>+</sup> Calcd for C<sub>14</sub>H<sub>18</sub>NaO<sub>5</sub> 289.1046; Found 289.1039.

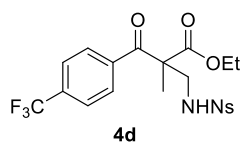

Following the general procedure described above, **4d** was obtained by flash column chromatography (petroleum ether/EtOAc = 5/1) as a white solid (72 mg, 74% yield). **<sup>1</sup>H NMR** (400 MHz, acetone-*d*<sub>6</sub>) δ 8.45 (d, *J* = 8.8 Hz, 2H), 8.14 (d, *J* = 8.8 Hz, 2H), 7.99 (d, *J* = 8.2 Hz, 2H), 7.87 (d, *J* = 8.3 Hz, 2H), 7.10 (s, 1H), 4.24 – 4.06 (m, 2H), 3.68 – 3.54 (m, 2H), 1.62 (s, 3H), 1.07 (t, *J* = 7.1 Hz, 3H). **<sup>13</sup>C NMR** (100 MHz, acetone-*d*<sub>6</sub>) δ 196.6, 171.9, 151.0, 147.4, 139.2, 134.3 (q, <sup>2</sup>*J*<sub>C-F</sub> = 32.6 Hz), 130.0, 129.2, 126.6 (q, <sup>3</sup>*J*<sub>C-F</sub> = 7.6 Hz), 125.3, 124.7 (q, <sup>1</sup>*J*<sub>C-F</sub> = 272.0 Hz), 62.7, 58.8, 49.3, 19.8, 13.9. **HRMS (ESI)** *m/z*: [M - H]<sup>-</sup> Calcd for C<sub>20</sub>H<sub>18</sub>F<sub>3</sub>N<sub>2</sub>O<sub>7</sub>S 487.0792; Found

487.0787. **Melting point:** 169.4-170.8 °C.

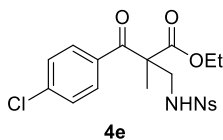

Following the general procedure described above, **4e** was obtained by flash column chromatography (petroleum ether/EtOAc = 8/1) as a white solid (76 mg, 83% yield). **<sup>1</sup>H NMR** (400 MHz, CDCl<sub>3</sub>) δ 8.34 (d, *J* = 8.4 Hz, 2H), 8.04 (d, *J* = 8.4 Hz, 2H), 7.71 (d, *J* = 8.2 Hz, 2H), 7.38 (d, *J* = 8.3 Hz, 2H), 5.69 – 5.62 (m, 1H), 4.24 – 4.09 (m, 2H), 3.51 – 3.36 (m, 2H), 1.57 (s, 3H), 1.10 (t, *J* = 7.1 Hz, 3H). **<sup>13</sup>C NMR** (100 MHz, CDCl<sub>3</sub>) δ 196.2, 171.5, 150.0, 146.0, 140.1, 132.5, 130.2, 129.0, 128.2, 124.4, 62.5, 57.8, 48.9, 19.6, 13.7. **HRMS (ESI)** *m/z*: [M + Na]<sup>+</sup> Calcd for C<sub>19</sub>H<sub>19</sub>ClN<sub>2</sub>NaO<sub>7</sub>S 477.0494; Found 477.0507. **Melting point:** 167.2-168.5 °C.

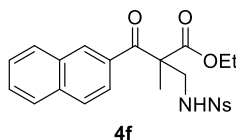

Following the general procedure described above, **4f** was obtained by flash column chromatography (petroleum ether/EtOAc = 8/1) as a white solid (82 mg, 87% yield). **<sup>1</sup>H NMR** (400 MHz, CDCl<sub>3</sub>) δ 8.37 – 8.21 (m, 3H), 8.03 (d, *J* = 8.5 Hz, 2H), 7.94 – 7.74 (m, 4H), 7.61 (t, *J* = 7.5 Hz, 1H), 7.54 (t, *J* = 7.5 Hz, 1H), 5.76 (t, *J* = 6.8 Hz, 1H), 4.25 – 4.11 (m, 2H), 3.61 – 3.46 (m, 2H), 1.68 (s, 3H), 1.07 (t, *J* = 7.1 Hz, 3H). **<sup>13</sup>C NMR** (100 MHz, CDCl<sub>3</sub>) δ 197.1, 171.9, 149.9, 145.9, 135.4, 132.1, 131.5, 130.6, 129.6, 129.0, 128.4, 128.1, 127.6, 127.1, 124.3, 124.1, 62.3, 57.8, 49.0, 19.9, 13.7. **HRMS (ESI)** *m/z*: [M + Na]<sup>+</sup> Calcd for C<sub>23</sub>H<sub>22</sub>N<sub>2</sub>NaO<sub>7</sub>S 493.1040; Found 493.1039. **Melting point:** 142.0-143.5 °C.

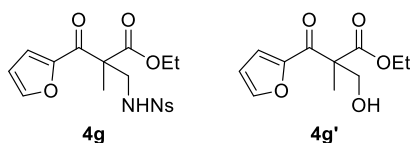

Following the general procedure described above, **4g** (major product, white solid, 53 mg, 65% yield) and **4g'** (minor product, colorless oil, 14 mg, 32% yield) were obtained by flash column chromatography (petroleum ether/EtOAc = 5/1).

Data for product **4g**: **<sup>1</sup>H NMR** (400 MHz, CDCl<sub>3</sub>) δ 8.34 (d, *J* = 8.8 Hz, 2H),

8.02 (d,  $J = 8.8$  Hz, 2H), 7.53 (s, 1H), 7.23 (d,  $J = 3.6$  Hz, 1H), 6.56 – 6.50 (m, 1H), 5.62 (t,  $J = 6.8$  Hz, 1H), 4.23 – 4.04 (m, 2H), 3.43 (d,  $J = 6.3$  Hz, 2H), 1.56 (s, 3H), 1.10 (t,  $J = 7.1$  Hz, 3H).  $^{13}\text{C}$  NMR (100 MHz,  $\text{CDCl}_3$ )  $\delta$  186.0, 171.0, 150.9, 149.9, 146.5, 146.0, 128.2, 124.4, 119.1, 112.7, 62.0, 57.1, 47.8, 18.5, 13.8. **HRMS (ESI)**  $m/z$ :  $[\text{M} + \text{Na}]^+$  Calcd for  $\text{C}_{17}\text{H}_{18}\text{N}_2\text{NaO}_8\text{S}$  433.0676; Found 433.0686. **Melting point:** 163.1-165.4 °C.

Data for product **4g'**:  $^1\text{H}$  NMR (400 MHz,  $\text{CDCl}_3$ )  $\delta$  7.54 (s, 1H), 7.32 – 7.18 (d,  $J = 3.5$  Hz, 1H), 6.53 (d,  $J = 3.4$  Hz, 1H), 4.24 – 4.08 (m, 2H), 4.03 – 3.91 (m, 2H), 2.80 (t,  $J = 6.8$  Hz, 1H), 1.56 (s, 3H), 1.10 (t,  $J = 7.1$  Hz, 3H).  $^{13}\text{C}$  NMR (100 MHz,  $\text{CDCl}_3$ )  $\delta$  187.3, 172.1, 151.5, 146.1, 118.4, 112.4, 66.7, 61.5, 58.5, 17.5, 13.9. **HRMS (ESI)**  $m/z$ :  $[\text{M} + \text{Na}]^+$  Calcd for  $\text{C}_{11}\text{H}_{14}\text{NaO}_5$  249.0733; Found 249.0727.

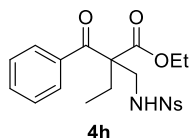

Following the general procedure described above, **4h** was obtained by flash column chromatography (petroleum ether/EtOAc = 8/1) as a white solid (70 mg, 80% yield).  $^1\text{H}$  NMR (400 MHz,  $\text{CDCl}_3$ )  $\delta$  8.33 (d,  $J = 8.4$  Hz, 2H), 8.02 (d,  $J = 8.4$  Hz, 2H), 7.74 (d,  $J = 7.8$  Hz, 2H), 7.54 (t,  $J = 7.4$  Hz, 1H), 7.40 (t,  $J = 7.7$  Hz, 2H), 5.37 – 5.25 (m, 1H), 4.24 – 4.06 (m, 2H), 3.60 (dd,  $J = 13.1, 5.6$  Hz, 1H), 3.45 (dd,  $J = 13.1, 7.8$  Hz, 1H), 2.29 – 2.06 (m, 2H), 1.08 (t,  $J = 7.1$  Hz, 3H), 0.75 (t,  $J = 7.5$  Hz, 3H).  $^{13}\text{C}$  NMR (100 MHz,  $\text{CDCl}_3$ )  $\delta$  196.9, 171.6, 150.0, 145.7, 135.1, 133.4, 128.6, 128.3, 128.2, 124.4, 62.1, 61.4, 45.8, 25.8, 13.7, 8.0. **HRMS (ESI)**  $m/z$ :  $[\text{M} + \text{Na}]^+$  Calcd for  $\text{C}_{20}\text{H}_{22}\text{N}_2\text{NaO}_7\text{S}$  457.1040; Found 457.1051. **Melting point:** 132.0-132.8 °C.

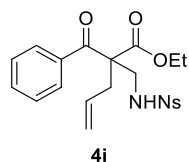

Following the general procedure described above, **4i** was obtained by flash column chromatography (petroleum ether/EtOAc = 8/1) as a white solid (76 mg, 85% yield).  $^1\text{H}$  NMR (400 MHz,  $\text{CDCl}_3$ )  $\delta$  8.31 (d,  $J = 8.8$  Hz, 2H), 8.00 (d,  $J = 8.8$  Hz, 2H), 7.73 (d,  $J = 7.1$  Hz, 2H), 7.55 (t,  $J = 7.4$  Hz, 1H), 7.40 (t,  $J = 7.8$  Hz, 2H), 5.54 –

5.39 (m, 1H), 5.35 (t,  $J = 6.6$  Hz, 1H), 5.06 – 4.93 (m, 2H), 4.25 – 4.09 (m, 2H), 3.59 (dd,  $J = 13.2, 5.0$  Hz, 1H), 3.45 (dd,  $J = 13.3, 7.5$  Hz, 1H), 2.91 (dd,  $J = 14.8, 7.1$  Hz, 1H), 2.82 (dd,  $J = 14.8, 7.9$  Hz, 1H), 1.10 (t,  $J = 7.1$  Hz, 3H).  $^{13}\text{C}$  NMR (100 MHz,  $\text{CDCl}_3$ )  $\delta$  196.3, 171.1, 150.0, 145.7, 135.0, 133.5, 130.5, 128.6, 128.5, 128.2, 124.4, 120.7, 62.4, 60.7, 46.5, 37.6, 13.7. **HRMS (ESI)**  $m/z$ :  $[\text{M} + \text{Na}]^+$  Calcd for  $\text{C}_{21}\text{H}_{22}\text{N}_2\text{NaO}_7\text{S}$  469.1040; Found 469.1049. **Melting point:** 145.6-146.4 °C.

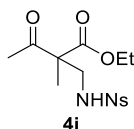

Following the general procedure described above, **4j** was obtained by flash column chromatography (petroleum ether/EtOAc = 8/1) as a white solid (63 mg, 88% yield).  $^1\text{H}$  NMR (400 MHz,  $\text{CDCl}_3$ )  $\delta$  8.36 (d,  $J = 8.9$  Hz, 2H), 8.03 (d,  $J = 9.0$  Hz, 2H), 5.56 (t,  $J = 6.9$  Hz, 1H), 4.19 (q,  $J = 7.0$  Hz, 2H), 3.34 – 3.19 (m, 2H), 2.19 (s, 3H), 1.44 (s, 3H), 1.26 (t,  $J = 7.1$  Hz, 3H).  $^{13}\text{C}$  NMR (100 MHz,  $\text{CDCl}_3$ )  $\delta$  205.6, 171.0, 150.0, 145.7, 128.2, 124.4, 62.2, 59.8, 47.3, 26.5, 18.2, 13.9. **HRMS (ESI)**  $m/z$ :  $[\text{M} + \text{Na}]^+$  Calcd for  $\text{C}_{14}\text{H}_{18}\text{N}_2\text{NaO}_7\text{S}$  381.0727; Found 381.0733. **Melting point:** 115.2-116.8 °C.

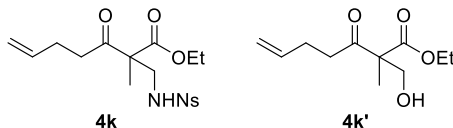

Following the general procedure described above, **4k** (major product, colorless oil, 58 mg, 73% yield) and **4k'** (minor product, colorless oil, 21 mg, 50% yield) were obtained by flash column chromatography (petroleum ether/EtOAc = 8/1).

Data for product **4k**:  $^1\text{H}$  NMR (400 MHz,  $\text{CDCl}_3$ )  $\delta$  8.36 (d,  $J = 8.5$  Hz, 2H), 8.03 (d,  $J = 8.6$  Hz, 2H), 5.82 – 5.66 (m, 1H), 5.51 (t,  $J = 6.9$  Hz, 1H), 5.07 – 4.91 (m, 2H), 4.18 (q,  $J = 6.3, 5.7$  Hz, 2H), 3.34 – 3.20 (m, 2H), 2.66 – 2.48 (m, 2H), 2.37 – 2.19 (m, 2H), 1.44 (s, 3H), 1.25 (t,  $J = 7.1$  Hz, 3H).  $^{13}\text{C}$  NMR (100 MHz,  $\text{CDCl}_3$ )  $\delta$  206.9, 171.0, 150.0, 145.7, 136.4, 128.2, 124.4, 115.7, 62.2, 59.6, 47.5, 38.0, 27.5, 18.1, 13.9. **HRMS (ESI)**  $m/z$ :  $[\text{M} + \text{Na}]^+$  Calcd for  $\text{C}_{17}\text{H}_{22}\text{N}_2\text{NaO}_7\text{S}$  421.1040; Found 421.1047.

Data for product **4k'**:  $^1\text{H NMR}$  (400 MHz,  $\text{CDCl}_3$ )  $\delta$  5.87 – 5.70 (m, 1H), 5.09 – 4.91 (m, 2H), 4.23 (q,  $J = 7.1$  Hz, 2H), 3.87 (d,  $J = 11.4$  Hz, 1H), 3.80 (d,  $J = 11.4$  Hz, 1H), 2.84 – 2.49 (m, 3H), 2.38 – 2.26 (m, 2H), 1.38 (s, 3H), 1.28 (t,  $J = 7.1$  Hz, 3H).  $^{13}\text{C NMR}$  (100 MHz,  $\text{CDCl}_3$ )  $\delta$  207.7, 172.4, 136.9, 115.4, 66.6, 61.6, 61.1, 38.4, 27.5, 17.1, 14.0. **HRMS (ESI)**  $m/z$ :  $[\text{M} + \text{Na}]^+$  Calcd for  $\text{C}_{11}\text{H}_{18}\text{NaO}_4$  237.1097; Found 237.1092.

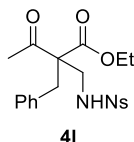

Following the general procedure described above, **4l** was obtained by flash column chromatography (petroleum ether/EtOAc = 8/1) as a white solid (75 mg, 86% yield).  $^1\text{H NMR}$  (400 MHz,  $\text{CDCl}_3$ )  $\delta$  8.34 (d,  $J = 8.9$  Hz, 2H), 7.98 (d,  $J = 8.9$  Hz, 2H), 7.25 – 7.18 (m, 3H), 7.09 – 7.00 (m, 2H), 5.24 (t, 1H), 4.32 – 4.17 (m, 2H), 3.38 – 3.14 (m, 4H), 2.25 (s, 3H), 1.30 (t,  $J = 7.1$  Hz, 3H).  $^{13}\text{C NMR}$  (100 MHz,  $\text{CDCl}_3$ )  $\delta$  204.5, 170.4, 150.1, 145.3, 134.3, 129.7, 128.7, 128.2, 127.6, 124.4, 64.4, 62.4, 45.4, 37.9, 27.9, 13.9. **HRMS (ESI)**  $m/z$ :  $[\text{M} + \text{Na}]^+$  Calcd for  $\text{C}_{20}\text{H}_{22}\text{N}_2\text{NaO}_7\text{S}$  457.1040; Found 457.1050. **Melting point:** 76.2-78.0 °C.

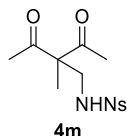

Following the general procedure described above, **4m** was obtained by flash column chromatography (petroleum ether/EtOAc = 8/1) as a white solid (53 mg, 80% yield).  $^1\text{H NMR}$  (400 MHz,  $\text{CDCl}_3$ )  $\delta$  8.36 (d,  $J = 8.8$  Hz, 2H), 8.03 (d,  $J = 8.7$  Hz, 2H), 5.61 – 5.52 (m, 1H), 3.23 (d,  $J = 6.8$  Hz, 2H), 2.17 (s, 6H), 1.44 (s, 3H).  $^{13}\text{C NMR}$  (100 MHz,  $\text{CDCl}_3$ )  $\delta$  207.2, 150.1, 145.4, 128.2, 124.5, 65.6, 47.1, 26.8, 17.8. **HRMS (ESI)**  $m/z$ :  $[\text{M} + \text{Na}]^+$  Calcd for  $\text{C}_{13}\text{H}_{16}\text{N}_2\text{NaO}_6\text{S}$  351.0621; Found 351.0626. **Melting point:** 133.3-134.8 °C.

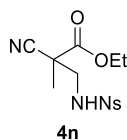

Following the general procedure described above, **4n** was obtained by flash

column chromatography (petroleum ether/EtOAc = 8/1) as a white solid (61 mg, 90% yield). **<sup>1</sup>H NMR** (400 MHz, CDCl<sub>3</sub>) δ 8.37 (d, *J* = 8.7 Hz, 2H), 8.07 (d, *J* = 8.6 Hz, 2H), 5.81 (t, *J* = 6.7 Hz, 1H), 4.26 (q, *J* = 7.4, 6.9 Hz, 2H), 3.48 (dd, *J* = 13.6, 6.1 Hz, 1H), 3.41 (dd, *J* = 13.6, 6.3 Hz, 1H), 1.62 (s, 3H), 1.31 (t, *J* = 7.1 Hz, 3H). **<sup>13</sup>C NMR** (100 MHz, CDCl<sub>3</sub>) δ 167.6, 150.2, 145.5, 128.3, 124.5, 118.1, 63.7, 48.2, 44.6, 20.8, 13.8. **HRMS (ESI)** *m/z*: [M + Na]<sup>+</sup> Calcd for C<sub>13</sub>H<sub>15</sub>N<sub>3</sub>NaO<sub>6</sub>S 364.0574; Found 364.0578. **Melting point:** 128.1-129.5 °C.

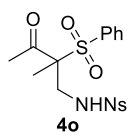

Following the general procedure described above, **4o** was obtained by flash column chromatography (petroleum ether/EtOAc = 8/1) as a white solid (78 mg, 91% yield). **<sup>1</sup>H NMR** (400 MHz, CDCl<sub>3</sub>) δ 8.35 (d, *J* = 8.4 Hz, 2H), 7.98 (d, *J* = 8.4 Hz, 2H), 7.80 – 7.63 (m, 3H), 7.55 (t, *J* = 7.7 Hz, 2H), 5.34 (t, *J* = 6.7 Hz, 1H), 3.48 (dd, *J* = 13.6, 6.3 Hz, 1H), 3.30 (dd, *J* = 13.5, 6.9 Hz, 1H), 2.43 (s, 3H), 1.75 (s, 3H). **<sup>13</sup>C NMR** (100 MHz, CDCl<sub>3</sub>) δ 202.7, 150.2, 145.3, 135.1, 134.2, 129.8, 129.3, 128.2, 124.5, 75.7, 45.1, 28.3, 15.4. **HRMS (ESI)** *m/z*: [M + Na]<sup>+</sup> Calcd for C<sub>17</sub>H<sub>18</sub>N<sub>2</sub>NaO<sub>7</sub>S<sub>2</sub> 449.04476; Found 449.04484. **Melting point:** 158.9-160.8 °C.

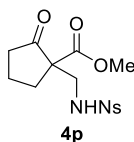

Following the general procedure described above, **4p** was obtained by flash column chromatography (petroleum ether/EtOAc = 8/1) as a white solid (60 mg, 84% yield). **<sup>1</sup>H NMR** (400 MHz, CDCl<sub>3</sub>) δ 8.36 (d, *J* = 8.7 Hz, 2H), 8.02 (d, *J* = 8.8 Hz, 2H), 5.67 (t, *J* = 6.8 Hz, 1H), 3.68 (s, 3H), 3.30 – 3.14 (m, 2H), 2.58 – 2.19 (m, 4H), 2.17 – 1.93 (m, 2H). **<sup>13</sup>C NMR** (100 MHz, CDCl<sub>3</sub>) δ 213.6, 171.4, 150.0, 145.6, 128.2, 124.5, 59.9, 53.0, 45.0, 38.1, 31.7, 19.5. **HRMS (ESI)** *m/z*: [M + Na]<sup>+</sup> Calcd for C<sub>14</sub>H<sub>16</sub>N<sub>2</sub>NaO<sub>7</sub>S 379.0570; Found 379.0580. **Melting point:** 93.5-94.7 °C.



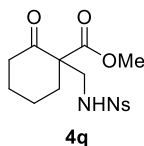

Following the general procedure described above, **4q** was obtained by flash column chromatography (petroleum ether/EtOAc = 8/1) as a white solid (63 mg, 85% yield). **<sup>1</sup>H NMR** (400 MHz, CDCl<sub>3</sub>) δ 8.36 (d, *J* = 8.4 Hz, 2H), 8.03 (d, *J* = 8.5 Hz, 2H), 5.64 – 5.46 (m, 1H), 3.73 (s, 3H), 3.26 (dd, *J* = 12.7, 8.4 Hz, 1H), 3.11 (dd, *J* = 12.7, 5.2 Hz, 1H), 2.70 – 2.54 (m, 1H), 2.51 – 2.33 (m, 2H), 2.11 – 1.95 (m, 1H), 1.88 – 1.74 (m, 1H), 1.66 – 1.57 (m, 3H). **<sup>13</sup>C NMR** (100 MHz, CDCl<sub>3</sub>) δ 209.1, 170.7, 150.0, 145.8, 128.2, 124.4, 61.4, 53.0, 47.3, 40.7, 34.1, 26.9, 21.9. **HRMS (ESI)** *m/z*: [M + Na]<sup>+</sup> Calcd for C<sub>15</sub>H<sub>18</sub>N<sub>2</sub>NaO<sub>7</sub>S 393.0727; Found 393.0733. **Melting point:** 152.1-153.6 °C.

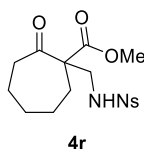

Following the general procedure described above, **4r** was obtained by flash column chromatography (petroleum ether/EtOAc = 8/1) as a white solid (58 mg, 75% yield). **<sup>1</sup>H NMR** (400 MHz, CDCl<sub>3</sub>) δ 8.35 (d, *J* = 8.8 Hz, 2H), 8.02 (d, *J* = 8.8 Hz, 2H), 5.73 – 5.65 (m, 1H), 3.70 (s, 3H), 3.33 – 3.19 (m, 2H), 2.79 – 2.68 (m, 1H), 2.54 – 2.43 (m, 1H), 2.10 – 1.99 (m, 1H), 1.96 – 1.85 (m, 1H), 1.85 – 1.70 (m, 2H), 1.69 – 1.48 (m, 3H), 1.41 – 1.28 (m, 1H). **<sup>13</sup>C NMR** (100 MHz, CDCl<sub>3</sub>) δ 210.2, 171.4, 149.9, 145.8, 128.2, 124.4, 62.7, 52.8, 47.4, 42.5, 31.5, 29.8, 25.7, 24.9. **HRMS (ESI)** *m/z*: [M + Na]<sup>+</sup> Calcd for C<sub>16</sub>H<sub>20</sub>N<sub>2</sub>NaO<sub>7</sub>S 407.0883; Found 407.0892. **Melting point:** 165.4-166.5 °C.

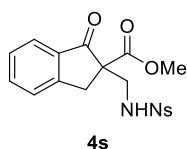

Following the general procedure described above, **4s** was obtained by flash column chromatography (petroleum ether/EtOAc = 8/1) as a white solid (75 mg, 93% yield). **<sup>1</sup>H NMR** (400 MHz, CDCl<sub>3</sub>) δ 8.35 (d, *J* = 8.5 Hz, 2H), 8.01 (d, *J* = 8.5 Hz, 2H), 7.73 (d, *J* = 7.7 Hz, 1H), 7.68 (t, *J* = 7.5 Hz, 1H), 7.54 (d, *J* = 7.7 Hz, 1H), 7.43

(t,  $J = 7.5$  Hz, 1H), 5.77 – 5.70 (m, 1H), 3.65 (s, 3H), 3.58 – 3.48 (m, 3H), 3.30 (dd,  $J = 13.0, 8.8$  Hz, 1H).  $^{13}\text{C}$  NMR (100 MHz,  $\text{CDCl}_3$ )  $\delta$  200.3, 171.2, 153.2, 150.1, 145.5, 136.2, 134.4, 128.2, 126.8, 125.1, 124.5, 60.1, 53.2, 46.5, 35.6. **HRMS (ESI)**  $m/z$ :  $[\text{M} + \text{Na}]^+$  Calcd for  $\text{C}_{18}\text{H}_{16}\text{N}_2\text{NaO}_7\text{S}$  427.0570; Found 427.0577. **Melting point:** 144.1-146.0 °C.

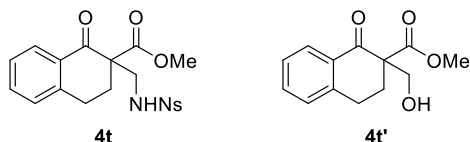

Following the general procedure described above, **4t** (major product, white solid, 69 mg, 82% yield) and **4t'** (minor product, colorless oil, 14 mg, 29% yield) were obtained by flash column chromatography (petroleum ether/EtOAc = 8/1 ~ 5/1).

Data for product **4t**:  $^1\text{H}$  NMR (400 MHz,  $\text{CDCl}_3$ )  $\delta$  8.36 (d,  $J = 8.7$  Hz, 2H), 8.04 (d,  $J = 8.7$  Hz, 2H), 7.98 (d,  $J = 7.8$  Hz, 1H), 7.52 (t,  $J = 7.4$  Hz, 1H), 7.33 (t,  $J = 7.6$  Hz, 1H), 7.25 (d,  $J = 7.8$  Hz, 1H), 5.88 – 5.79 (m, 1H), 3.65 (s, 3H), 3.51 (dd,  $J = 12.6, 8.7$  Hz, 1H), 3.30 (dd,  $J = 12.7, 4.6$  Hz, 1H), 3.05 – 2.98 (m, 2H), 2.51 (dt,  $J = 13.7, 4.7$  Hz, 1H), 2.30 (dt,  $J = 13.6, 7.7$  Hz, 1H).  $^{13}\text{C}$  NMR (100 MHz,  $\text{CDCl}_3$ )  $\delta$  195.4, 171.1, 150.0, 145.7, 143.1, 134.5, 131.2, 128.9, 128.3, 127.9, 127.1, 124.4, 58.0, 53.0, 46.9, 29.9, 25.6. **HRMS (ESI)**  $m/z$ :  $[\text{M} + \text{Na}]^+$  Calcd for  $\text{C}_{19}\text{H}_{18}\text{N}_2\text{NaO}_7\text{S}$  441.0727; Found 441.0737. **Melting point:** 177.0-178.4 °C.

Data for product **4t'**:  $^1\text{H}$  NMR (400 MHz,  $\text{CDCl}_3$ )  $\delta$  8.07 (d,  $J = 7.9$  Hz, 1H), 7.51 (t,  $J = 7.5$  Hz, 1H), 7.34 (t,  $J = 7.5$  Hz, 1H), 7.27 – 7.20 (m, 1H), 4.02 (dd,  $J = 11.3, 3.4$  Hz, 1H), 3.90 (t,  $J = 10.6$  Hz, 1H), 3.72 (s, 3H), 3.28 (dd,  $J = 9.9, 4.1$  Hz, 1H), 3.08 – 2.90 (m, 2H), 2.45 (dt,  $J = 13.7, 4.6$  Hz, 1H), 2.23 – 2.12 (m, 1H).  $^{13}\text{C}$  NMR (100 MHz,  $\text{CDCl}_3$ )  $\delta$  197.2, 171.7, 143.2, 134.0, 131.8, 128.8, 127.8, 127.0, 66.3, 59.2, 52.6, 29.2, 25.9. **HRMS (ESI)**  $m/z$ :  $[\text{M} + \text{Na}]^+$  Calcd for  $\text{C}_{13}\text{H}_{14}\text{NaO}_4$  257.0784; Found 257.0777.

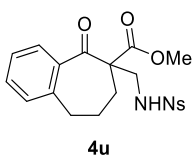

Following the general procedure described above, **4u** was obtained by flash

column chromatography (petroleum ether/EtOAc = 8/1) as a white solid (62 mg, 72% yield). **<sup>1</sup>H NMR** (400 MHz, CDCl<sub>3</sub>) δ 8.36 (d, *J* = 8.2 Hz, 2H), 8.05 (d, *J* = 8.2 Hz, 2H), 7.45 (d, *J* = 7.5 Hz, 1H), 7.40 (t, *J* = 7.3 Hz, 1H), 7.29 (d, *J* = 7.5 Hz, 1H), 7.14 (d, *J* = 7.3 Hz, 1H), 5.78 – 5.74 (m, 1H), 3.59 (s, 3H), 3.48 – 3.33 (m, 2H), 2.98 – 2.86 (m, 1H), 2.86 – 2.74 (m, 1H), 2.38 – 2.27 (m, 1H), 2.07 – 1.89 (m, 3H). **<sup>13</sup>C NMR** (100 MHz, CDCl<sub>3</sub>) δ 204.3, 171.3, 150.0, 145.8, 138.8, 138.7, 132.2, 129.4, 128.2, 126.7, 124.5, 62.0, 52.9, 47.9, 33.0, 30.1, 22.9. **HRMS (ESI)** *m/z*: [M + Na]<sup>+</sup> Calcd for C<sub>20</sub>H<sub>20</sub>N<sub>2</sub>NaO<sub>7</sub>S 455.0883; Found 455.0893. **Melting point**: 189.1-190.7 °C.

## 6.2 General procedure for the preparation of hydroxymethyl products 6

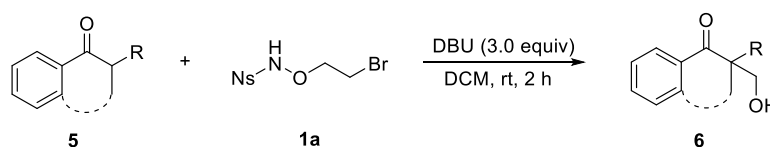

To a solution of  $\alpha$ -substituted ketone **5** (0.2 mmol, 1.0 equiv) and DBU (91 mg, 0.6 mmol, 3.0 equiv) in DCM (1 mL) was added the solution of **1a** (98 mg, 0.3 mmol, 1.5 equiv) in DCM (1 mL) dropwise at room temperature over 10 minutes. The reaction mixture was stirred at the same temperature for 2 h. After completion, the solution was quenched with saturated NH<sub>4</sub>Cl (2 mL). The organic layer was separated, and the aqueous layer was extracted with DCM (5 mL x 3). The combined organic layers were washed with brine (5 mL), dried over Na<sub>2</sub>SO<sub>4</sub> and concentrated in vacuum. The residue was purified by flash column chromatography (petroleum ether/EtOAc = 8/1 ~ 5/1) to afford the products **6a-i** in 61-91% yields.

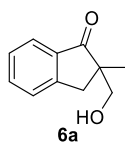

Following the general procedure described above, **6a** was obtained by flash column chromatography (petroleum ether/EtOAc = 8/1) as a colorless oil (32 mg, 91% yield). **<sup>1</sup>H NMR** (400 MHz, CDCl<sub>3</sub>) δ 7.72 (d, *J* = 7.6 Hz, 1H), 7.59 (t, *J* = 7.4 Hz,

1H), 7.45 (d,  $J = 7.6$  Hz, 1H), 7.35 (t,  $J = 7.3$  Hz, 1H), 3.82 (d,  $J = 10.7$  Hz, 1H), 3.61 (d,  $J = 10.7$  Hz, 1H), 3.25 (d,  $J = 17.2$  Hz, 1H), 2.88 (d,  $J = 17.2$  Hz, 1H), 2.48 (s, 1H), 1.23 (s, 3H). The spectral data of **6a** was consistent with that reported in the literature.<sup>24</sup>

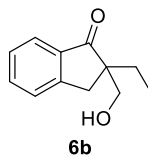

Following the general procedure described above, **6b** was obtained by flash column chromatography (petroleum ether/EtOAc = 8/1) as a colorless oil (32 mg, 85% yield). <sup>1</sup>H NMR (400 MHz, CDCl<sub>3</sub>)  $\delta$  7.71 (d,  $J = 7.7$  Hz, 1H), 7.59 (t,  $J = 7.4$  Hz, 1H), 7.46 (d,  $J = 7.6$  Hz, 1H), 7.35 (t,  $J = 7.4$  Hz, 1H), 3.85 (d,  $J = 10.7$  Hz, 1H), 3.61 (d,  $J = 10.8$  Hz, 1H), 3.12 – 2.94 (m, 2H), 2.46 (s, 1H), 1.81 – 1.61 (m, 2H), 0.80 (t,  $J = 7.5$  Hz, 3H). <sup>13</sup>C NMR (100 MHz, CDCl<sub>3</sub>)  $\delta$  211.6, 153.9, 136.7, 135.2, 127.4, 126.5, 123.8, 66.5, 54.8, 34.9, 26.5, 8.5. HRMS (ESI)  $m/z$ : [M + Na]<sup>+</sup> Calcd for C<sub>12</sub>H<sub>14</sub>NaO<sub>2</sub> 213.0886; Found 213.0878.

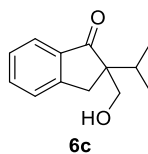

Following the general procedure described above, **6c** was obtained by flash column chromatography (petroleum ether/EtOAc = 8/1) as a colorless oil (34 mg, 83% yield). <sup>1</sup>H NMR (400 MHz, CDCl<sub>3</sub>)  $\delta$  7.72 (d,  $J = 7.7$  Hz, 1H), 7.59 (t,  $J = 7.4$  Hz, 1H), 7.46 (d,  $J = 7.7$  Hz, 1H), 7.35 (t,  $J = 7.4$  Hz, 1H), 3.93 – 3.84 (m, 1H), 3.61 (d,  $J = 10.8$  Hz, 1H), 3.08 (d,  $J = 17.6$  Hz, 1H), 2.73 (d,  $J = 17.6$  Hz, 1H), 2.51 (dd,  $J = 8.6, 3.5$  Hz, 1H), 2.41 (hept,  $J = 6.8$  Hz, 1H), 0.98 (d,  $J = 6.8$  Hz, 3H), 0.67 (d,  $J = 6.9$  Hz, 3H). <sup>13</sup>C NMR (100 MHz, CDCl<sub>3</sub>)  $\delta$  212.7, 154.4, 136.9, 135.1, 127.4, 126.3, 123.7, 66.0, 57.7, 31.6, 29.6, 17.6, 17.5. HRMS (ESI)  $m/z$ : [M + Na]<sup>+</sup> Calcd for C<sub>13</sub>H<sub>16</sub>NaO<sub>2</sub> 227.1043; Found 227.1041.

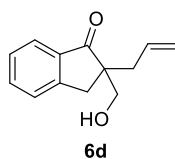

Following the general procedure described above, **6d** was obtained by flash column chromatography (petroleum ether/EtOAc = 8/1) as a colorless oil (37 mg, 91% yield).  $^1\text{H NMR}$  (400 MHz,  $\text{CDCl}_3$ )  $\delta$  7.70 (d,  $J = 7.7$  Hz, 1H), 7.58 (t,  $J = 7.4$  Hz, 1H), 7.44 (d,  $J = 7.7$  Hz, 1H), 7.33 (t,  $J = 7.4$  Hz, 1H), 5.68 – 5.53 (m, 1H), 5.09 (d,  $J = 16.9$  Hz, 1H), 5.00 (d,  $J = 10.1$  Hz, 1H), 3.83 (d,  $J = 10.9$  Hz, 1H), 3.62 (d,  $J = 10.9$  Hz, 1H), 3.12 – 2.98 (m, 2H), 2.57 (s, 1H), 2.48 – 2.34 (m, 2H).  $^{13}\text{C NMR}$  (100 MHz,  $\text{CDCl}_3$ )  $\delta$  210.7, 153.7, 136.3, 135.2, 132.8, 127.4, 126.5, 123.9, 118.8, 66.6, 54.2, 38.1, 34.6. **HRMS (ESI)**  $m/z$ :  $[\text{M} + \text{Na}]^+$  Calcd for  $\text{C}_{13}\text{H}_{14}\text{NaO}_2$  225.0886; Found 225.0884.

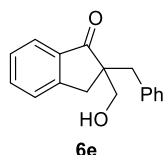

Following the general procedure described above, **6e** was obtained by flash column chromatography (petroleum ether/EtOAc = 8/1) as a colorless oil (44 mg, 88% yield).  $^1\text{H NMR}$  (400 MHz,  $\text{CDCl}_3$ )  $\delta$  7.71 (d,  $J = 7.6$  Hz, 1H), 7.53 (t,  $J = 7.4$  Hz, 1H), 7.38 – 7.24 (m, 2H), 7.24 – 7.10 (m, 5H), 3.83 (d,  $J = 10.9$  Hz, 1H), 3.62 (d,  $J = 10.9$  Hz, 1H), 3.15 (d,  $J = 17.4$  Hz, 1H), 3.05 (d,  $J = 13.5$  Hz, 1H), 2.97 (d,  $J = 13.5$  Hz, 1H), 2.82 (d,  $J = 17.4$  Hz, 1H), 2.68 (s, 1H).  $^{13}\text{C NMR}$  (100 MHz,  $\text{CDCl}_3$ )  $\delta$  211.1, 153.5, 136.7, 136.1, 135.2, 130.2, 128.1, 127.4, 126.5, 126.4, 124.0, 66.5, 55.1, 38.6, 34.2. **HRMS (ESI)**  $m/z$ :  $[\text{M} + \text{Na}]^+$  Calcd for  $\text{C}_{17}\text{H}_{16}\text{NaO}_2$  275.1043; Found 275.1042.

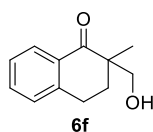

Following the general procedure described above, **6f** was obtained by flash column chromatography (petroleum ether/EtOAc = 8/1) as a colorless oil (24 mg, 63% yield).  $^1\text{H NMR}$  (400 MHz,  $\text{CDCl}_3$ )  $\delta$  8.01 (d,  $J = 7.8$  Hz, 1H), 7.49 (t,  $J = 7.4$  Hz, 1H), 7.31 (t,  $J = 7.5$  Hz, 1H), 7.25 (d,  $J = 7.8$  Hz, 1H), 3.82 – 3.57 (m, 2H), 3.16 (ddd,  $J = 17.2, 12.0, 5.0$  Hz, 1H), 2.94 (dt,  $J = 17.4, 4.3$  Hz, 1H), 2.85 (t,  $J = 6.6$  Hz, 1H), 2.23 (td,  $J = 12.8, 5.1$  Hz, 1H), 1.82 – 1.71 (m, 1H), 1.23 (s, 3H). The spectral data of

**6f** was consistent with that reported in the literature.<sup>25</sup>

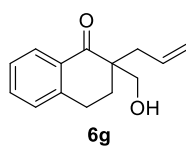

Following the general procedure described above, **6g** was obtained by flash column chromatography (petroleum ether/EtOAc = 8/1) as a colorless oil (26 mg, 61% yield). <sup>1</sup>H NMR (400 MHz, CDCl<sub>3</sub>) δ 8.01 (d, *J* = 7.8 Hz, 1H), 7.49 (t, *J* = 7.5 Hz, 1H), 7.31 (t, *J* = 7.6 Hz, 1H), 7.25 (d, *J* = 7.8 Hz, 1H), 5.91 – 5.72 (m, 1H), 5.25 – 5.09 (m, 2H), 3.79 – 3.61 (m, 2H), 3.13 (ddd, *J* = 16.9, 11.4, 5.1 Hz, 1H), 2.99 – 2.84 (m, 2H), 2.50 (dd, *J* = 14.0, 6.9 Hz, 1H), 2.34 (dd, *J* = 13.9, 8.0 Hz, 1H), 2.05 (ddd, *J* = 13.7, 11.4, 5.1 Hz, 1H), 1.93 (dt, *J* = 13.8, 4.5 Hz, 1H). <sup>13</sup>C NMR (100 MHz, CDCl<sub>3</sub>) δ 203.8, 143.5, 133.7, 132.7, 131.4, 128.8, 127.7, 126.8, 119.0, 66.3, 49.0, 34.7, 27.8, 24.7. HRMS (ESI) *m/z*: [M + Na]<sup>+</sup> Calcd for C<sub>14</sub>H<sub>16</sub>NaO<sub>2</sub> 239.1043; Found 239.1042.

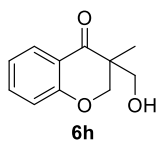

Following the general procedure described above, **6h** was obtained by flash column chromatography (petroleum ether/EtOAc = 5/1) as a colorless oil (31 mg, 81% yield). <sup>1</sup>H NMR (400 MHz, CDCl<sub>3</sub>) δ 7.89 (d, *J* = 7.8 Hz, 1H), 7.49 (t, *J* = 7.7 Hz, 1H), 7.08 – 6.85 (m, 2H), 4.52 (d, *J* = 11.5 Hz, 1H), 4.18 (d, *J* = 11.5 Hz, 1H), 3.93 (dd, *J* = 11.1, 6.6 Hz, 1H), 3.59 (dd, *J* = 11.2, 6.3 Hz, 1H), 2.29 (t, *J* = 6.3 Hz, 1H), 1.23 (s, 3H). The spectral data of **6h** was consistent with that reported in the literature.<sup>26</sup>

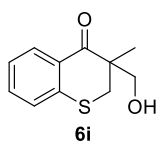

Following the general procedure described above, **6i** was obtained by flash column chromatography (petroleum ether/EtOAc = 5/1) as a colorless oil (26 mg, 62% yield). <sup>1</sup>H NMR (400 MHz, CDCl<sub>3</sub>) δ 8.07 (d, *J* = 8.0 Hz, 1H), 7.37 (t, *J* = 7.5 Hz, 1H), 7.23 (d, *J* = 7.9 Hz, 1H), 7.16 (t, *J* = 7.6 Hz, 1H), 3.98 (dd, *J* = 11.3, 6.7 Hz, 1H),

3.66 – 3.57 (m, 2H), 2.78 (d,  $J = 13.6$  Hz, 1H), 2.57 (t,  $J = 6.7$  Hz, 1H), 1.33 (s, 3H).  $^{13}\text{C}$  NMR (100 MHz,  $\text{CDCl}_3$ )  $\delta$  199.0, 141.6, 133.3, 129.9, 129.7, 127.2, 124.8, 67.8, 45.8, 34.7, 17.6. **HRMS (ESI)**  $m/z$ :  $[\text{M} + \text{Na}]^+$  Calcd for  $\text{C}_{11}\text{H}_{12}\text{NaO}_2\text{S}$  231.0450; Found 231.0449.

## 7. General procedure for the catalytic asymmetric reactions of indanone carboxylates **7** with hydroxylamine **1a**

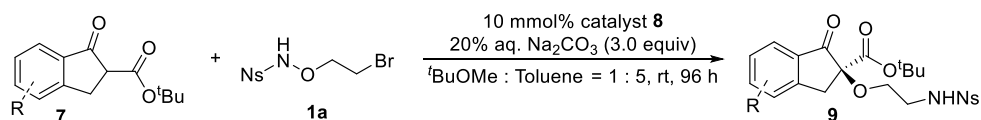

To a solution of *tert*-butyl indanone carboxylate substrates **7** (0.24 mmol, 1.2 equiv), hydroxylamine **1a** (0.2 mmol, 1.0 equiv), and catalyst **8** (16 mg, 0.02mmol, 0.1 equiv) in *t*BuOMe/toluene (2 mL,  $v/v = 1/5$ ) was added 20% aq.  $\text{Na}_2\text{CO}_3$  (318  $\mu\text{L}$ , 0.6 mmol, 3.0 equiv) at room temperature. The reaction mixture was stirred at the same temperature for 96 h. After completion, the solution was quenched with saturated  $\text{NH}_4\text{Cl}$  (2 mL) and extracted with EtOAc (3 mL x 3), dried over  $\text{Na}_2\text{SO}_4$  and concentrated in vacuum. The residue was purified by flash silica gel chromatography (petroleum ether/EtOAc = 10/1 ~ 5/1) to afford the products **9a-1** in 50-67% yield and 90-97% ee. The absolute configuration of products **9** was determined to be the *S* by comparing their specific rotation value with the reported data in the literature.<sup>1</sup>

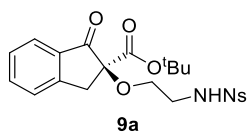

Following the general procedure described above, **9a** was obtained by flash silica chromatography (PE/EtOAc = 10/1) as a white solid (56 mg, 60% yield). The compound was determined to be 91% ee by HPLC analysis. **HPLC conditions:** Daicel Chiralpak OD-H, Hexane/*i*-PrOH = 85/15, 1.0 mL/min, 254 nm, 41 bar, 25 °C;  $t(\text{major}) = 23.9$  min,  $t(\text{minor}) = 32.2$ .  $[\alpha]_{\text{D}}^{25} = -10.9$  ( $c = 1.05$ ,  $\text{CHCl}_3$ ); Reported data from Lit.<sup>1</sup>:  $[\alpha]_{\text{D}}^{25} = -9.6$  ( $c = 0.8$ ,  $\text{CHCl}_3$ ).  $^1\text{H}$  NMR (400 MHz,  $\text{CDCl}_3$ )  $\delta$  8.32 (d,  $J = 8.6$  Hz, 2H), 8.08 (d,  $J = 8.6$  Hz, 2H), 7.74 (d,  $J = 7.6$  Hz, 1H), 7.65 (t,  $J = 7.5$  Hz,

1H), 7.47 – 7.38 (m, 2H), 6.24 (s, 1H), 3.88 – 3.67 (m, 2H), 3.47 (d,  $J = 17.2$  Hz, 1H), 3.29 – 3.16 (m, 2H), 3.07 (d,  $J = 17.2$  Hz, 1H), 1.37 (s, 9H). The spectral data of **9a** was consistent with that reported in the literature.<sup>1</sup>

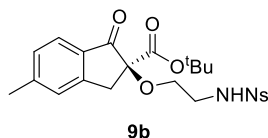

Following the general procedure described above, **9b** was obtained by flash silica chromatography (petroleum ether/EtOAc = 10/1) as a white solid (48 mg, 51% yield). The compound was determined to be 90% ee by HPLC analysis. **HPLC conditions:** Daicel Chiralpak OD-H, Hexane/*i*-PrOH = 85/15, 1.0 mL/min, 254 nm, 41 bar, 25 °C;  $t(\text{major}) = 20.5$  min,  $t(\text{minor}) = 25.8$  min. **<sup>1</sup>H NMR** (400 MHz, CDCl<sub>3</sub>)  $\delta$  8.31 (d,  $J = 8.8$  Hz, 2H), 8.08 (d,  $J = 8.8$  Hz, 2H), 7.64 (d,  $J = 8.2$  Hz, 1H), 7.25 – 7.17 (m, 2H), 6.20 (s, 1H), 3.91 – 3.66 (m, 2H), 3.41 (d,  $J = 17.2$  Hz, 1H), 3.30 – 3.16 (m, 2H), 2.99 (d,  $J = 17.2$  Hz, 1H), 2.46 (s, 3H), 1.38 (s, 9H). The spectral data of **9b** was consistent with that reported in the literature.<sup>1</sup>

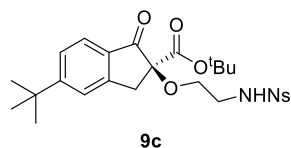

Following the general procedure described above, **9c** was obtained by flash silica chromatography (petroleum ether/EtOAc = 10/1) as a colorless oil (63 mg, 59% yield). The compound was determined to be 90% ee by HPLC analysis. **HPLC conditions:** Daicel Chiralpak AD-H, Hexane/*i*-PrOH = 85/15, 1.0 mL/min, 254 nm, 41 bar, 25 °C;  $t(\text{major}) = 19.7$  min,  $t(\text{minor}) = 23.5$  min.  $[\alpha]_D^{25} = 4.2$  ( $c = 0.4$ , CHCl<sub>3</sub>); Reported data from Lit.<sup>1</sup>:  $[\alpha]_D^{25} = 3.1$  ( $c = 0.5$ , CHCl<sub>3</sub>). **<sup>1</sup>H NMR** (400 MHz, CDCl<sub>3</sub>)  $\delta$  8.31 (d,  $J = 8.1$  Hz, 2H), 8.08 (d,  $J = 8.1$  Hz, 2H), 7.66 (d,  $J = 8.1$  Hz, 1H), 7.50 – 7.37 (m, 2H), 6.28 (s, 1H), 3.84 – 3.65 (m, 2H), 3.45 (d,  $J = 17.1$  Hz, 1H), 3.27 – 3.14 (m, 2H), 3.03 (d,  $J = 17.1$  Hz, 1H), 1.38 (s, 9H), 1.36 (s, 9H). The spectral data of **9c** was consistent with that reported in the literature.<sup>1</sup>



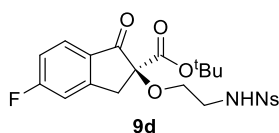

Following the general procedure described above, **9d** was obtained by flash silica chromatography (petroleum ether/EtOAc = 8/1) as a white solid (52 mg, 53% yield). The compound was determined to be 90% ee by HPLC analysis. **HPLC conditions:** Daicel Chiralpak OD-H, Hexane/*i*-PrOH = 75/25, 1.0 mL/min, 254 nm, 47 bar, 25 °C;  $t(\text{major}) = 14.1$  min,  $t(\text{minor}) = 22.8$  min. **<sup>1</sup>H NMR** (400 MHz, CDCl<sub>3</sub>)  $\delta$  8.33 (d,  $J = 8.7$  Hz, 2H), 8.09 (d,  $J = 8.7$  Hz, 2H), 7.77 (dd,  $J = 7.9, 5.4$  Hz, 1H), 7.15 – 7.08 (m, 2H), 6.16 (s, 1H), 3.89 – 3.66 (m, 2H), 3.47 (d,  $J = 17.4$  Hz, 1H), 3.31 – 3.15 (m, 2H), 3.08 (d,  $J = 17.4$  Hz, 1H), 1.38 (s, 9H). The spectral data of **9d** was consistent with that reported in the literature.<sup>1</sup>

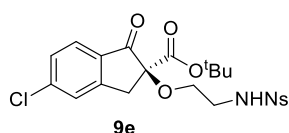

Following the general procedure described above, **9e** was obtained by flash silica chromatography (petroleum ether/EtOAc = 8/1) as a white solid (64 mg, 63% yield). The compound was determined to be 90% ee by HPLC analysis. **HPLC conditions:** Daicel Chiralpak OD-H, Hexane/*i*-PrOH = 85/15, 1.0 mL/min, 254 nm, 41 bar, 25 °C;  $t(\text{major}) = 27.5$  min,  $t(\text{minor}) = 39.0$  min. **<sup>1</sup>H NMR** (400 MHz, CDCl<sub>3</sub>)  $\delta$  8.33 (d,  $J = 8.6$  Hz, 2H), 8.08 (d,  $J = 8.6$  Hz, 2H), 7.68 (d,  $J = 8.1$  Hz, 1H), 7.52 – 7.32 (m, 2H), 6.17 (s, 1H), 3.86 – 3.68 (m, 2H), 3.45 (d,  $J = 17.4$  Hz, 1H), 3.29 – 3.15 (m, 2H), 3.07 (d,  $J = 17.4$  Hz, 1H), 1.38 (s, 9H). The spectral data of **9e** was consistent with that reported in the literature.<sup>1</sup>

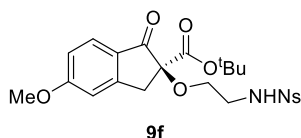

Following the general procedure described above, **9f** was obtained by flash silica chromatography (petroleum ether/EtOAc = 8/1) as a white solid (57 mg, 56% yield). The compound was determined to be 90% ee by HPLC analysis. **HPLC conditions:**

Daicel Chiralpak OD-H, Hexane/*i*-PrOH = 85/15, 1.0 mL/min, 254 nm, 41 bar, 25 °C;  $t(\text{major}) = 35.7$  min,  $t(\text{minor}) = 44.8$  min.  $^1\text{H NMR}$  (400 MHz,  $\text{CDCl}_3$ )  $\delta$  8.31 (d,  $J = 8.6$  Hz, 2H), 8.08 (d,  $J = 8.6$  Hz, 2H), 7.68 (d,  $J = 8.6$  Hz, 1H), 6.94 (d,  $J = 8.4$  Hz, 1H), 6.84 (s, 1H), 6.22 (s, 1H), 3.91 (s, 3H), 3.87 – 3.64 (m, 2H), 3.44 (d,  $J = 17.2$  Hz, 1H), 3.27 – 3.15 (m, 2H), 2.98 (d,  $J = 17.2$  Hz, 1H), 1.39 (s, 9H). The spectral data of **9f** was consistent with that reported in the literature.<sup>1</sup>

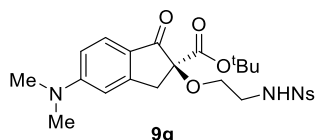

Following the general procedure described above (1.0 equiv of 50% aq.  $\text{Cs}_2\text{CO}_3$  was used), **9g** was obtained by flash silica chromatography (petroleum ether/EtOAc = 5/1) as a yellow solid (70 mg, 67% yield). The compound was determined to be 96% ee by HPLC analysis. **HPLC conditions:** Daicel Chiralpak OD-H, Hexane/*i*-PrOH = 80/20, 1.0 mL/min, 254 nm, 50 bar, 25 °C;  $t(\text{major}) = 24.1$  min,  $t(\text{minor}) = 31.4$  min.  $^1\text{H NMR}$  (400 MHz,  $\text{CDCl}_3$ )  $\delta$  8.27 (d,  $J = 8.8$  Hz, 2H), 8.7 (d,  $J = 8.7$  Hz, 2H), 7.59 (d,  $J = 8.8$  Hz, 1H), 6.75 – 6.62 (m, 1H), 6.46 (s, 1H), 6.31 (s, 1H), 3.82 – 3.67 (m, 2H), 3.34 (d,  $J = 17.0$  Hz, 1H), 3.27 – 3.18 (m, 2H), 3.12 (s, 6H), 2.85 (d,  $J = 17.0$  Hz, 1H), 1.39 (s, 9H). The spectral data of **9g** was consistent with that reported in the literature.<sup>1</sup>

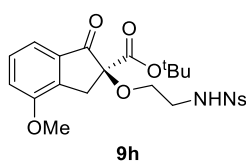

Following the general procedure described above, **9h** was obtained by flash silica chromatography (petroleum ether/EtOAc = 8/1) as a white solid (48mg, 50% yield). The compound was determined to be 90% ee by HPLC analysis. **HPLC conditions:** Daicel Chiralpak AD-H, Hexane/*i*-PrOH = 75/25, 1.0 mL/min, 254 nm, 51 bar, 25 °C;  $t(\text{major}) = 14.5$  min,  $t(\text{minor}) = 20.9$  min.  $^1\text{H NMR}$  (400 MHz,  $\text{CDCl}_3$ )  $\delta$  8.30 (d,  $J = 8.6$  Hz, 2H), 8.06 (d,  $J = 8.6$  Hz, 2H), 7.42 – 7.29 (m, 2H), 7.07 (d,  $J = 7.8$  Hz, 1H), 6.25– 6.17 (m, 1H), 3.90 (s, 3H), 3.85 – 3.65 (m, 2H), 3.35 – 3.17 (m, 3H), 2.81 (d,  $J = 17.6$  Hz, 1H), 1.38 (s, 9H). The spectral data of **9h** was consistent with that reported

in the literature.<sup>1</sup>

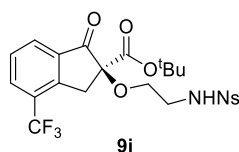

Following the general procedure described above, **9i** was obtained by flash silica chromatography (petroleum ether/EtOAc = 12/1) as a colorless oil (72 mg, 66% yield). The compound was determined to be 95% ee by HPLC analysis. **HPLC conditions:** Daicel Chiralpak OD-H, Hexane/*i*-PrOH = 93/7, 1.0 mL/min, 254 nm, 39 bar, 25 °C;  $t(\text{major}) = 47.5$  min,  $t(\text{minor}) = 53.9$  min.  $[\alpha]_D^{25} = -12.2$  ( $c = 0.7$ ,  $\text{CHCl}_3$ ). **<sup>1</sup>H NMR** (400 MHz,  $\text{CDCl}_3$ )  $\delta$  8.32 (d,  $J = 8.8$  Hz, 2H), 8.08 (d,  $J = 8.8$  Hz, 2H), 7.91 (t,  $J = 8.3$  Hz, 2H), 7.57 (t,  $J = 7.7$  Hz, 1H), 6.14 (s, 1H), 3.89– 3.70 (m, 2H), 3.60 (d,  $J = 17.8$  Hz, 1H), 3.29 – 3.14 (m, 3H), 1.36 (s, 9H). **<sup>13</sup>C NMR** (100 MHz,  $\text{CDCl}_3$ )  $\delta$  197.1, 168.7, 149.9, 148.5 (q,  $^3J_{\text{C-F}} = 2.5$  Hz), 146.0, 135.5, 132.4 (q,  $^2J_{\text{C-F}} = 5.5$  Hz), 128.8, 128.5, 128.4, 128.2, 124.2, 123.4 (q,  $^1J_{\text{C-F}} = 272.0$  Hz), 84.6, 84.0, 65.1, 43.4, 38.1, 27.7. **HRMS (ESI)**  $m/z$ :  $[\text{M} + \text{Na}]^+$  Calcd for  $\text{C}_{23}\text{H}_{23}\text{F}_3\text{N}_2\text{NaO}_8\text{S}$  567.1019; Found 567.1041.

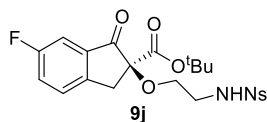

Following the general procedure described above, **9j** was obtained by flash silica chromatography (petroleum ether/EtOAc = 8/1) as a white solid (57 mg, 58% yield). The compound was determined to be 93% ee by HPLC analysis. **HPLC conditions:** Daicel Chiralpak OD-H, Hexane/*i*-PrOH = 85/15, 1.0 mL/min, 254 nm, 41 bar, 25 °C;  $t(\text{major}) = 31.2$  min,  $t(\text{minor}) = 40.9$  min. **<sup>1</sup>H NMR** (400 MHz,  $\text{CDCl}_3$ )  $\delta$  8.34 (d,  $J = 8.8$  Hz, 2H), 8.09 (d,  $J = 8.8$  Hz, 2H), 7.49 – 7.31 (m, 3H), 6.20 (t,  $J = 4.4$  Hz, 1H), 3.90 – 3.69 (m, 2H), 3.44 (d,  $J = 17.0$  Hz, 1H), 3.25 – 3.19 (m, 2H), 3.04 (d,  $J = 17.0$  Hz, 1H), 1.38 (s, 9H). The spectral data of **9j** was consistent with that reported in the literature.<sup>1</sup>

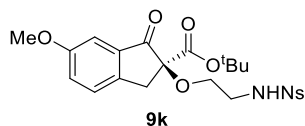

Following the general procedure described above, **9k** was obtained by flash silica chromatography (petroleum ether/EtOAc = 8/1) as a white solid (60 mg, 59% yield). The compound was determined to be 90% ee by HPLC analysis. **HPLC conditions:** Daicel Chiralpak OD-H, Hexane/*i*-PrOH = 85/15, 1.0 mL/min, 254 nm, 41 bar, 25 °C;  $t(\text{major}) = 30.4$  min,  $t(\text{minor}) = 41.2$  min. **<sup>1</sup>H NMR** (400 MHz, CDCl<sub>3</sub>)  $\delta$  8.31 (d,  $J = 8.6$  Hz, 2H), 8.08 (d,  $J = 8.5$  Hz, 2H), 7.40 – 7.18 (m, 2H), 7.14 (s, 1H), 6.25 (s, 1H), 3.89 – 3.68 (m, 5H), 3.39 (d,  $J = 16.8$  Hz, 1H), 3.30 – 3.16 (m, 2H), 2.98 (d,  $J = 16.9$  Hz, 1H), 1.37 (s, 9H). The spectral data of **9k** was consistent with that reported in the literature.<sup>1</sup>

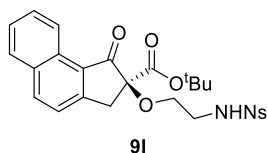

Following the general procedure described above, **9l** was obtained by flash silica chromatography (petroleum ether/EtOAc = 10/1) as a white solid (64 mg, 61% yield). The compound was determined to be 97% ee by HPLC analysis. **HPLC conditions:** Daicel Chiralpak OD-H, Hexane/*i*-PrOH = 88/12, 1.0 mL/min, 254 nm, 39 bar, 25 °C;  $t(\text{major}) = 47.6$  min,  $t(\text{minor}) = 54.5$  min.  $[\alpha]_{\text{D}}^{25} = 21.4$  ( $c = 2.21$ , CHCl<sub>3</sub>); Reported data from Lit.<sup>1</sup>:  $[\alpha]_{\text{D}}^{25} = 19.1$  ( $c = 2.25$ , CHCl<sub>3</sub>). **<sup>1</sup>H NMR** (400 MHz, CDCl<sub>3</sub>)  $\delta$  8.97 (d,  $J = 8.3$  Hz, 1H), 8.29 (d,  $J = 8.8$  Hz, 2H), 8.15 – 8.05 (m, 3H), 7.93 (d,  $J = 8.1$  Hz, 1H), 7.72 (t,  $J = 7.6$  Hz, 1H), 7.61 (t,  $J = 7.5$  Hz, 1H), 7.48 (d,  $J = 8.4$  Hz, 1H), 6.27 (s, 1H), 3.95 – 3.73 (m, 2H), 3.59 (d,  $J = 17.4$  Hz, 1H), 3.31 – 3.11 (m, 3H), 1.39 (s, 9H). The spectral data of **9l** was consistent with that reported in the literature.<sup>1</sup>

## 8 General procedure for the catalytic asymmetric Mannich reactions

### 8.1 Screening of the reaction conditions

The following catalysts **S16-S19** and **8** were known compounds and were prepared from literature.<sup>1</sup>

**Table S4. Catalyst screening for reaction of 7a and 1a<sup>a</sup>**

**S16:** R<sup>2</sup> = Ph, Ar = Ph  
**S17:** R<sup>2</sup> = pivaloyl, Ar = Ph  
**S18:** R<sup>2</sup> = pivaloyl, Ar = 2-naphthyl  
**S19:** R<sup>2</sup> = pivaloyl, Ar = anthryl  
**8:** Ar = 4-<sup>t</sup>Bu-Ph

| entry | T (°C) | t (h) | Cat.       | base                                   | yield of <b>10a</b> (%) <sup>b</sup> | ee of <b>10a</b> (%) <sup>c</sup> |
|-------|--------|-------|------------|----------------------------------------|--------------------------------------|-----------------------------------|
| 1     | rt     | 96    | <b>S16</b> | 20% aq Na <sub>2</sub> CO <sub>3</sub> | 25                                   | 8                                 |
| 2     | rt     | 96    | <b>S17</b> | 20% aq Na <sub>2</sub> CO <sub>3</sub> | 20                                   | 15                                |
| 3     | rt     | 96    | <b>S18</b> | 20% aq Na <sub>2</sub> CO <sub>3</sub> | 22                                   | 26                                |
| 4     | rt     | 96    | <b>S19</b> | 20% aq Na <sub>2</sub> CO <sub>3</sub> | 29                                   | 33                                |
| 5     | rt     | 96    | <b>8</b>   | 20% aq Na <sub>2</sub> CO <sub>3</sub> | 45                                   | 42                                |

<sup>a</sup>Reaction conditions: **1a** (0.1 mmol), **7a** (0.12 mmol), catalyst (10 mol%) and base (0.3 mmol) indicated temperature.

<sup>b</sup>Isolated yield. <sup>c</sup>Determined by HPLC analysis.

**Table S5. Initial results for reaction of benzoyl acetate and 1a<sup>a</sup>**

| entry | T (°C) | base                                  | yield (%) <sup>b</sup> | ee (%) <sup>c</sup> |
|-------|--------|---------------------------------------|------------------------|---------------------|
| 1     | rt     | Cs <sub>2</sub> CO <sub>3</sub> (50%) | 0                      | 0                   |
| 2     | rt     | KOH (50%)                             | 21                     | 5                   |

**8, Ar = 4-<sup>t</sup>Bu-Ph**

<sup>a</sup>Reaction conditions: **1a** (0.1 mmol), **S20** (0.12 mmol), catalyst (10 mol%) and base (0.3 mmol) indicated temperature. <sup>b</sup>Isolated yield. <sup>c</sup>Determined by HPLC analysis.

### 8.2 Investigation of the solvent effect via mass and NMR spectroscopy

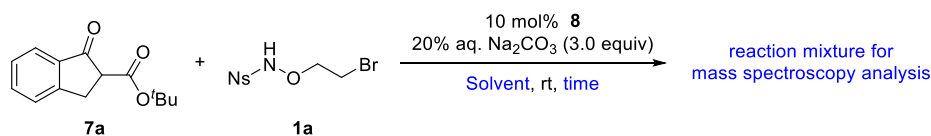

To a solution of *tert*-butyl indanone carboxylate **7a** (56 mg, 0.24 mmol, 1.2 equiv), hydroxylamine **1a** (65 mg, 0.2 mmol, 1.0 equiv), and catalyst **8** (16 mg,

0.02mmol, 0.1 equiv) in toluene or toluene/<sup>t</sup>BuOMe (v/v = 5/1) (2 mL) was added 20% aq. Na<sub>2</sub>CO<sub>3</sub> (318 uL, 0.6 mmol, 3.0 equiv) at room temperature. After stirring at room temperature for 12 h, 48 h, and 64 h, an aliquot of reaction solution was taken out from toluene or toluene/<sup>t</sup>BuOMe solvents. Then, the mixture was subjected to mass spectroscopy analysis. The recorded ESI-MS data and assigned structures of possible compounds were demonstrated in following **Figures S5-6**.

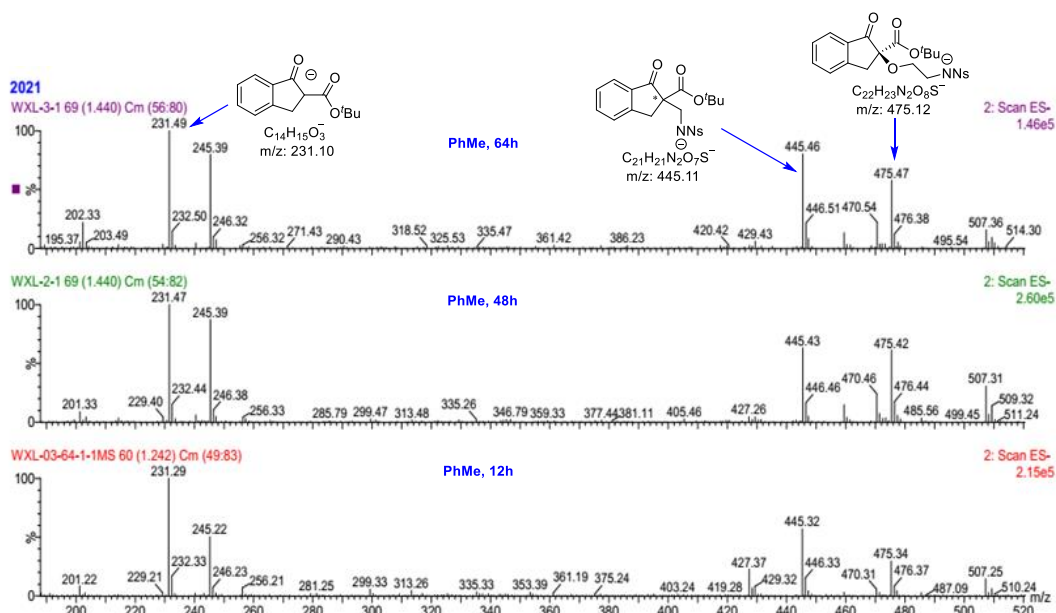

**Figure S5. ESI-MS data of the reaction mixture (toluene as solvent)**

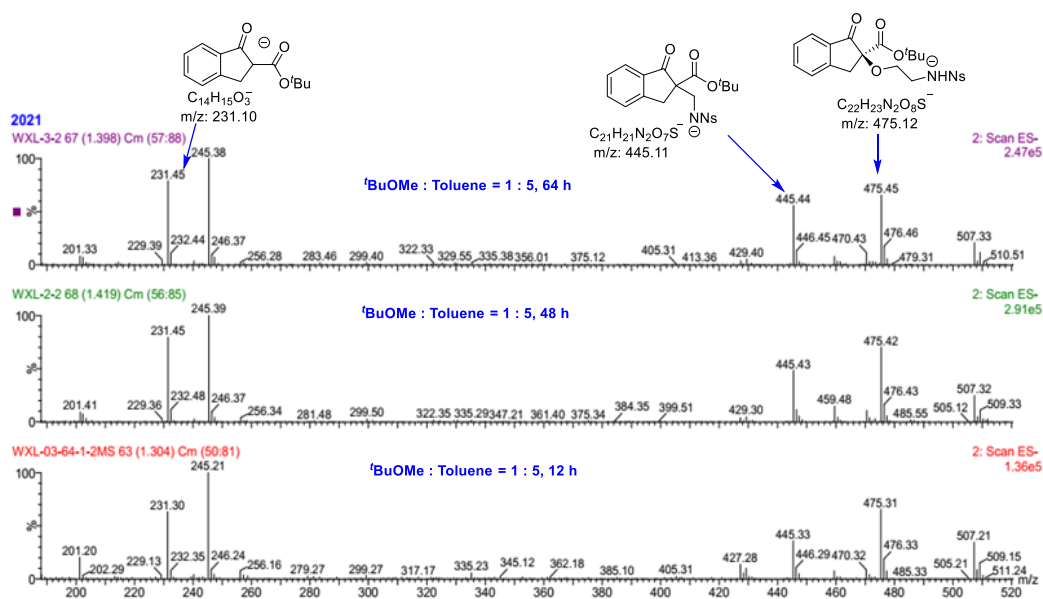

**Figure S6. ESI-MS data of the reaction mixture (toluene/<sup>t</sup>BuOMe as solvents)**

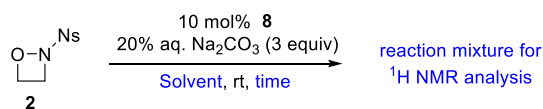

To a solution of 1,2-oxazetidine **2** (12 mg, 0.05 mmol, 1.0 equiv) and catalyst **8** (4 mg, 0.005 mmol, 0.1 equiv) in toluene or toluene/ $t$ BuOMe (v/v = 5/1) (0.5 mL) was added 20% aq.  $\text{Na}_2\text{CO}_3$  (80  $\mu\text{L}$ , 0.15 mmol, 3.0 equiv), the reaction mixture was stirred at room temperature. After stirring at room temperature for 12 h, 48 h, and 72 h, the crude reaction mixture was subjected to  $^1\text{H NMR}$  analysis (mesitylene was used as internal standard). The  $^1\text{H NMR}$  spectra were shown in following **Figures S7-14**.

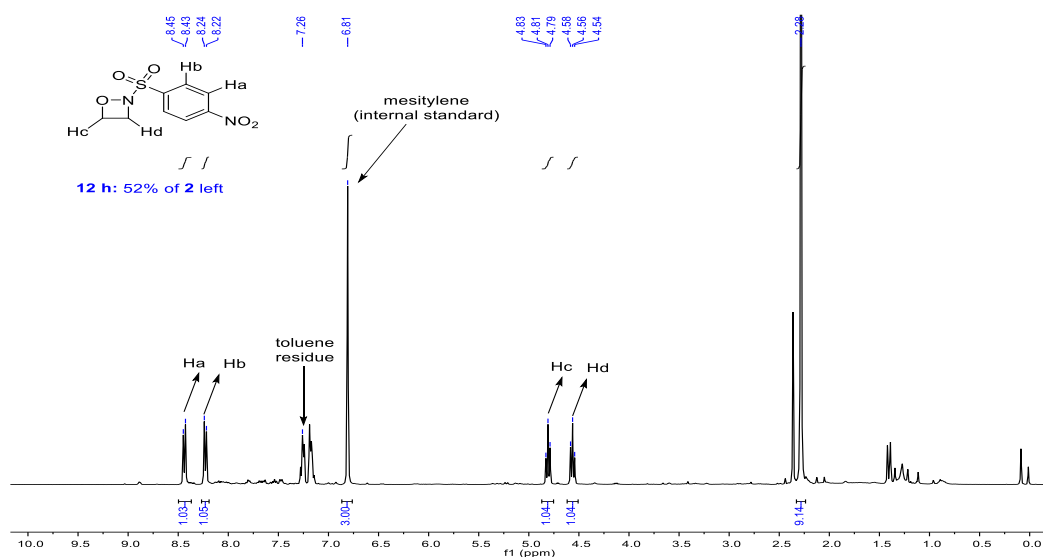

**Figure S7. Crude  $^1\text{H NMR}$  of compound 2 (toluene as solvent, 12 h)**

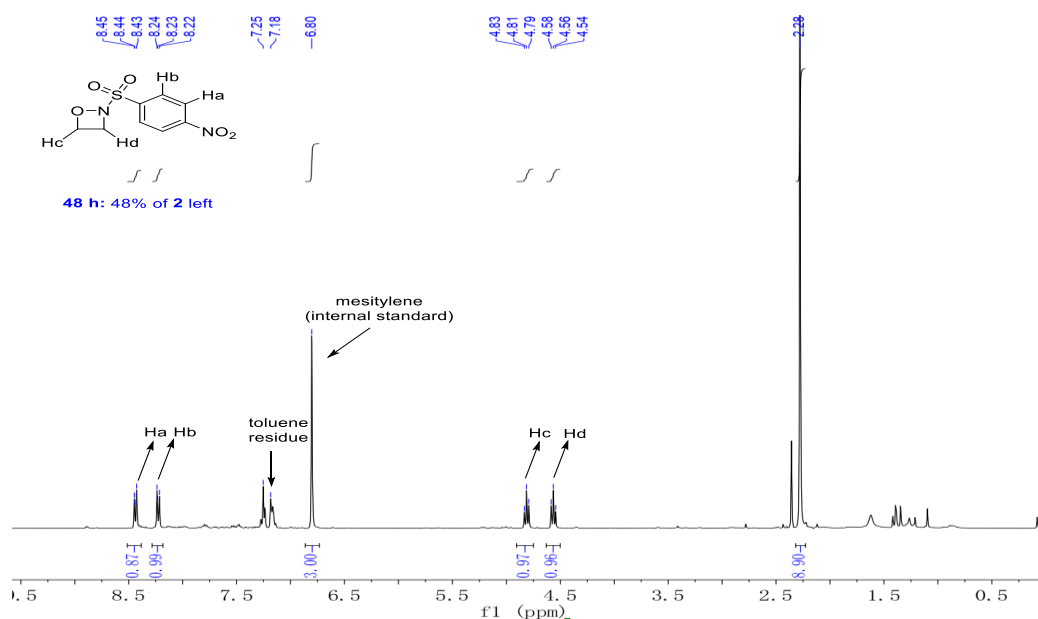

**Figure S8. Crude  $^1\text{H NMR}$  of compound 2 (toluene as solvent, 48 h)**

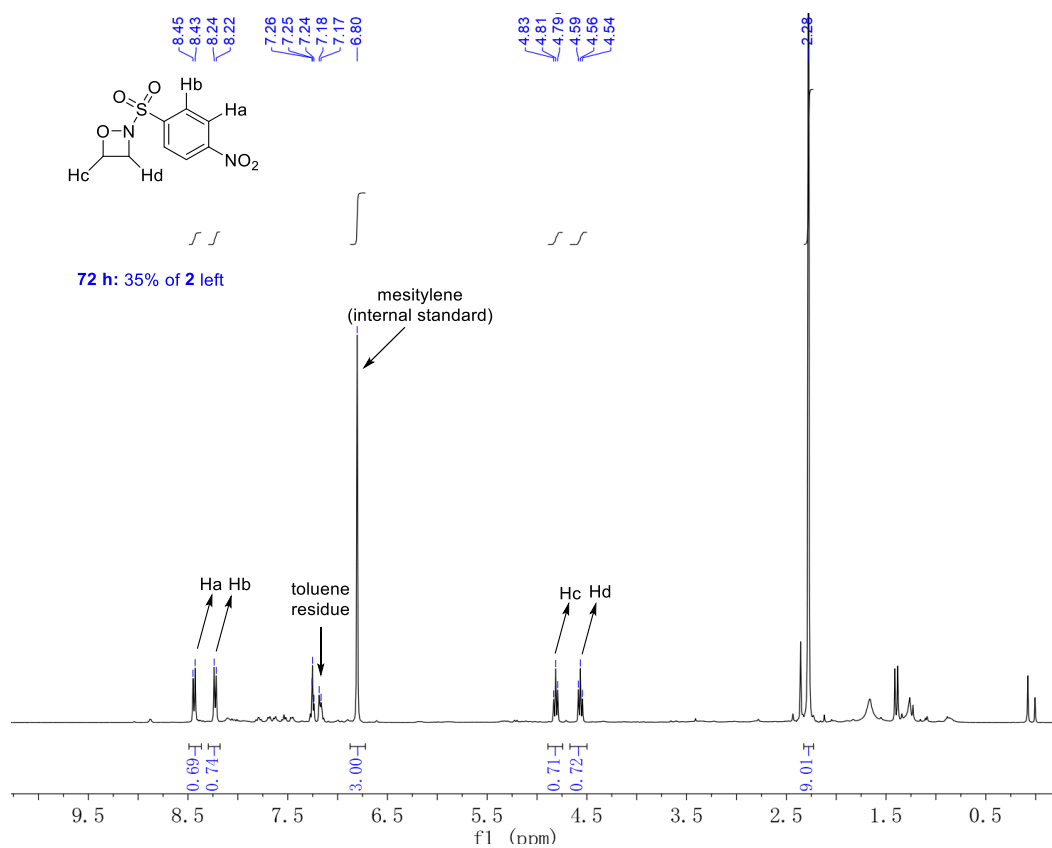

**Figure S9. Crude <sup>1</sup>H NMR of compound 2 (toluene as solvent, 72 h)**

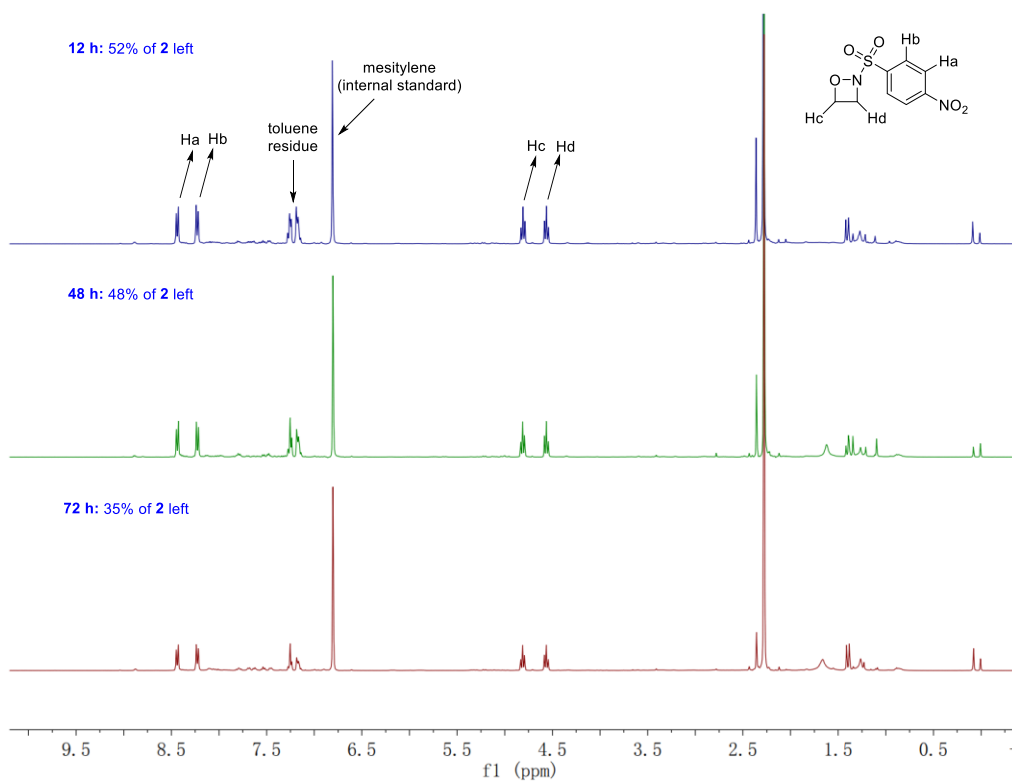

**Figure S10. Comparison of the crude <sup>1</sup>H NMR (toluene as solvent)**



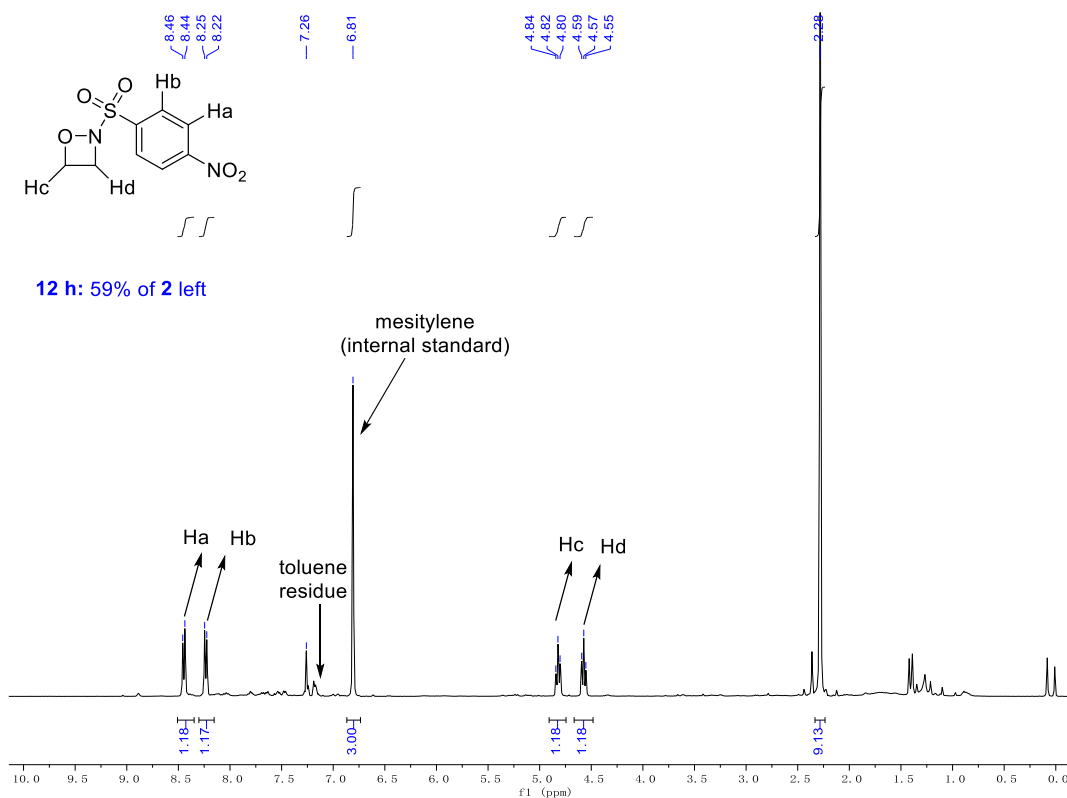

**Figure S11.** Crude  $^1\text{H}$  NMR of compound **2** ( $t$ BuOMe/Toluene as solvents, 12 h)

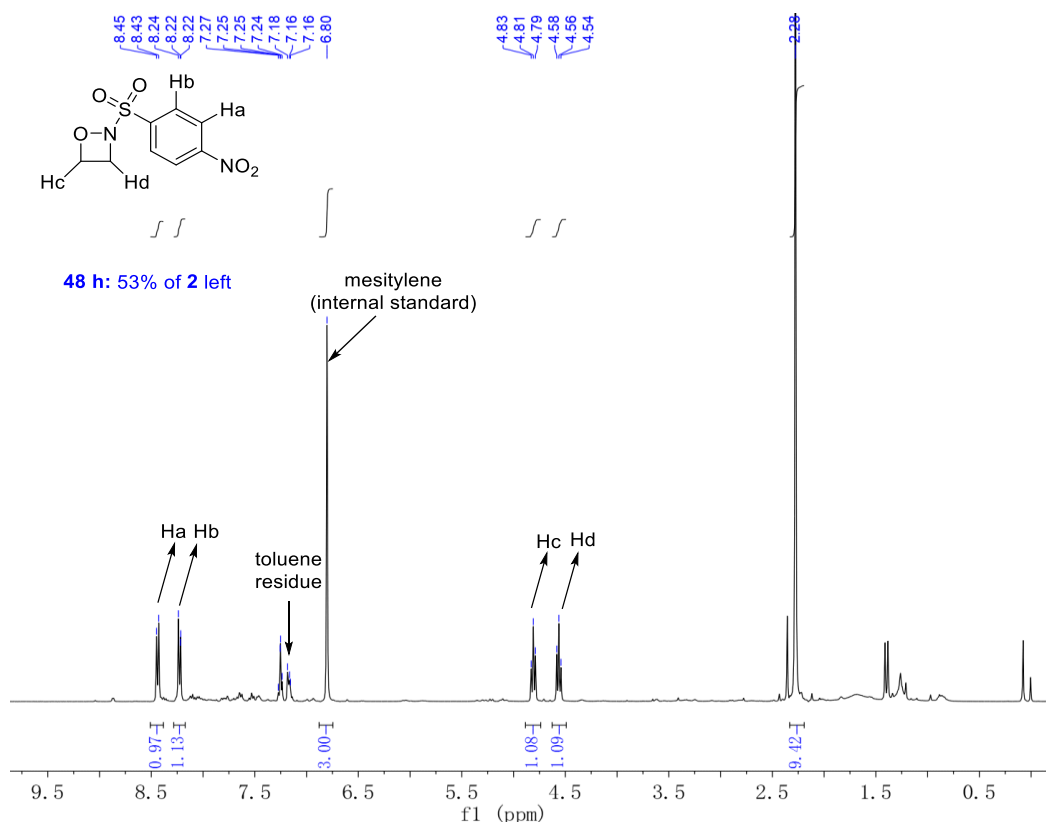

**Figure S12.** Crude  $^1\text{H}$  NMR of compound **2** ( $t$ BuOMe/Toluene as solvents, 48 h)

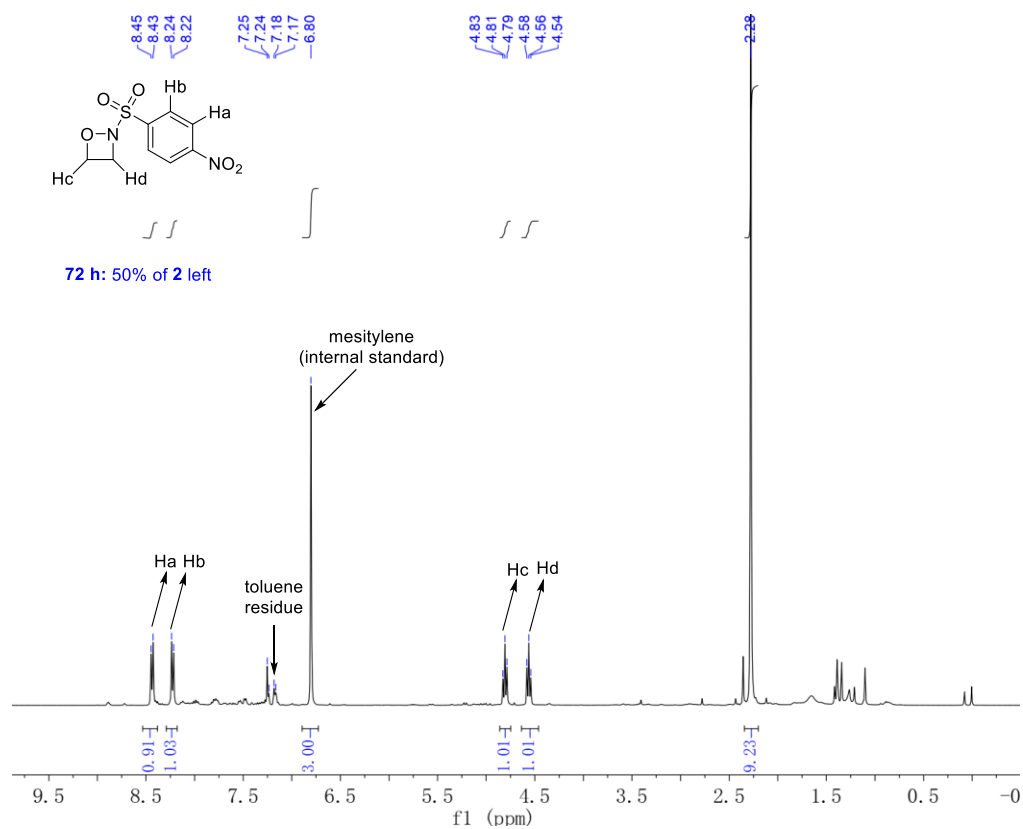

**Figure S13. Crude <sup>1</sup>H NMR of compound 2 (<sup>t</sup>BuOMe/Toluene as solvents, 72 h)**

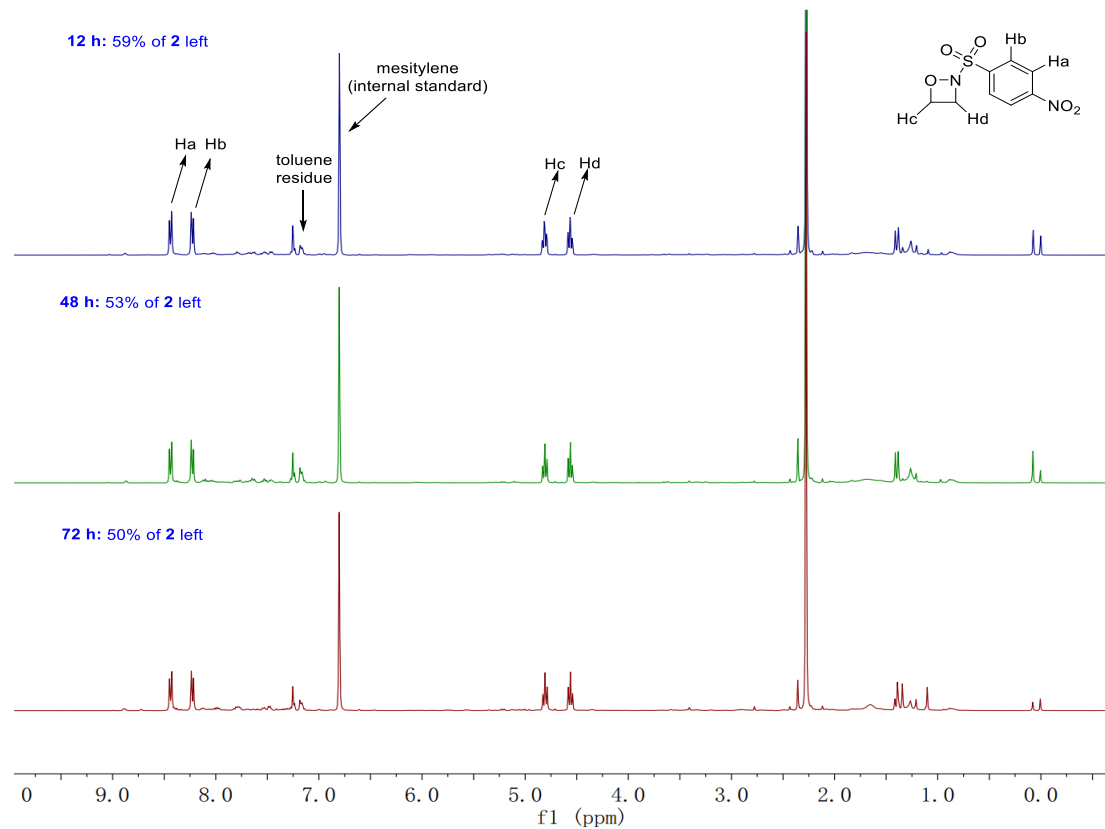

**Figure S14. Comparison of the crude <sup>1</sup>H NMR (<sup>t</sup>BuOMe/Toluene as solvents)**

### 8.3 General procedure for catalytic asymmetric Mannich reactions

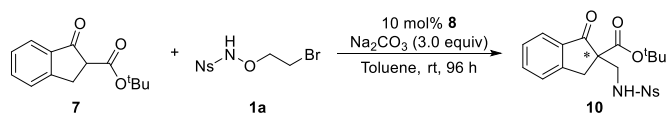

To a solution of *tert*-butyl indanone carboxylate substrates **7** (0.24 mmol, 1.2 equiv), hydroxylamine **1a** (0.2 mmol, 1.0 equiv), and catalyst **8** (16 mg, 0.02mmol, 0.1 equiv) in toluene (2 mL) was added 20% aq. Na<sub>2</sub>CO<sub>3</sub> (318 uL, 0.6 mmol, 3.0 equiv) at room temperature. The reaction mixture was stirred at the same temperature for 96 h. After completion, the solution was quenched with saturated NH<sub>4</sub>Cl (2 mL) and extracted with EtOAc (3 mL x 3), dried over Na<sub>2</sub>SO<sub>4</sub> and concentrated in vacuum. The residue was purified by flash silica gel chromatography (petroleum ether/EtOAc = 10/1 ~ 5/1) to afford the products **10a-d** in 40-45% yield and 42-56% ee.

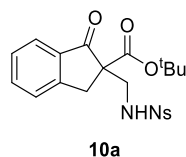

Following the general procedure described above, **10a** was obtained by flash silica chromatography (petroleum ether/EtOAc = 10/1) as a white solid (40 mg, 45% yield). The compound was determined to be 42% ee by HPLC analysis. **HPLC conditions:** Daicel Chiralpak AD-H, Hexane/*i*-PrOH = 70/30, 1.0 mL/min, 254 nm, 55 bar, 25 °C; t(major) = 13.9 min, t(minor) = 26.8 min.  $[\alpha]_D^{25} = -12.6$  (c = 0.3, CHCl<sub>3</sub>). **<sup>1</sup>H NMR** (400 MHz, CDCl<sub>3</sub>) δ 8.36 (d, *J* = 8.5 Hz, 2H), 8.00 (d, *J* = 8.5 Hz, 2H), 7.77 – 7.63 (m, 2H), 7.53 (d, *J* = 7.5 Hz, 1H), 7.42 (t, *J* = 7.3 Hz, 1H), 5.67 (dd, *J* = 9.3, 4.4 Hz, 1H), 3.45 (d, *J* = 19.2 Hz, 3H), 3.22 (dd, *J* = 12.8, 9.1 Hz, 1H), 1.33 (s, 9H). **<sup>13</sup>C NMR** (100 MHz, CDCl<sub>3</sub>) δ 200.8, 170.2, 153.1, 150.1, 145.5, 135.9, 134.6, 128.2, 128.1, 126.7, 124.9, 124.5, 83.4, 60.6, 46.5, 35.9, 27.7. **HRMS (ESI)** m/z: [M + Na]<sup>+</sup> Calcd for C<sub>21</sub>H<sub>22</sub>N<sub>2</sub>NaO<sub>7</sub>S 469.1040; Found 469.1045. **Melting point:** 153.2-154.5 °C.

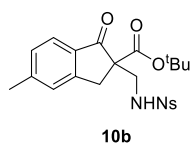

Following the general procedure described above, **10b** was obtained by flash

silica chromatography (petroleum ether/EtOAc = 10/1) as a white solid (40 mg, 43% yield). The compound was determined to be 56% ee by HPLC analysis. **HPLC conditions:** Daicel Chiralpak OD-H, Hexane/*i*-PrOH = 85/15, 1.0 mL/min, 254 nm, 41 bar, 25 °C; *t*(major) = 19.8 min, *t*(minor) = 23.5 min.  $[\alpha]_D^{25} = -27.4$  (*c* = 1.25, CHCl<sub>3</sub>). **<sup>1</sup>H NMR** (400 MHz, CDCl<sub>3</sub>) δ 8.35 (d, *J* = 8.8 Hz, 2H), 8.00 (d, *J* = 8.8 Hz, 2H), 7.62 (d, *J* = 7.9 Hz, 1H), 7.31 (s, 1H), 7.23 (d, *J* = 7.8 Hz, 1H), 5.64 (dd, *J* = 8.9, 4.1 Hz, 1H), 3.41 (s, 3H), 3.21 (dd, *J* = 12.7, 9.2 Hz, 1H), 2.47 (s, 3H), 1.33 (s, 9H). **<sup>13</sup>C NMR** (100 MHz, CDCl<sub>3</sub>) δ 200.2, 170.3, 153.6, 150.1, 147.5, 145.6, 132.4, 129.4, 128.2, 127.0, 124.7, 124.5, 83.3, 60.7, 46.6, 35.8, 27.7, 22.2. **HRMS (ESI)** *m/z*: [M + Na]<sup>+</sup> Calcd for C<sub>22</sub>H<sub>24</sub>N<sub>2</sub>NaO<sub>7</sub>S 483.1209; Found 483.1196. **Melting point:** 161.7-162.6 °C.

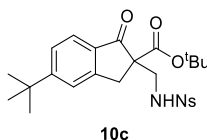

Following the general procedure described above, **10c** was obtained by flash silica chromatography (petroleum ether/EtOAc = 10/1) as a white solid (45 mg, 45% yield). The compound was determined to be 48% ee by HPLC analysis. **HPLC conditions:** Daicel Chiralpak OD-H, Hexane/*i*-PrOH = 85/15, 1.0 mL/min, 254 nm, 41 bar, 25 °C; *t*(major) = 11.7 min, *t*(minor) = 15.8 min.  $[\alpha]_D^{25} = -21.6$  (*c* = 1.15, CHCl<sub>3</sub>). **<sup>1</sup>H NMR** (400 MHz, CDCl<sub>3</sub>) δ 8.35 (d, *J* = 8.6 Hz, 2H), 8.00 (d, *J* = 8.6 Hz, 2H), 7.65 (d, *J* = 8.1 Hz, 1H), 7.54 – 7.40 (m, 2H), 5.68 (dd, *J* = 8.6, 3.9 Hz, 1H), 3.50 – 3.32 (m, 3H), 3.22 (dd, *J* = 12.5, 9.3 Hz, 1H), 1.37 (s, 9H), 1.34 (s, 9H). **<sup>13</sup>C NMR** (100 MHz, CDCl<sub>3</sub>) δ 200.3, 170.3, 160.5, 153.5, 150.1, 145.5, 132.2, 128.2, 126.0, 124.5, 123.2, 83.3, 60.8, 46.6, 36.0, 35.7, 31.1, 27.7. **HRMS (ESI)** *m/z*: [M + Na]<sup>+</sup> Calcd for C<sub>25</sub>H<sub>30</sub>N<sub>2</sub>NaO<sub>7</sub>S 525.1666; Found 525.1676. **Melting point:** 158.4-159.3 °C.

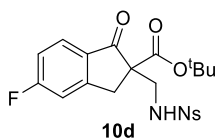

Following the general procedure described above, **10d** was obtained by flash

silica chromatography (petroleum ether/EtOAc = 10/1) as a white solid (37mg, 40% yield). The compound was determined to be 52% ee by HPLC analysis. **HPLC conditions:** Daicel Chiralpak OD-H, Hexane/*i*-PrOH = 85/15, 1.0 mL/min, 254 nm, 41 bar, 25 °C; *t*(major) = 21.3 min, *t*(minor) = 25.8 min.  $[\alpha]_D^{25} = -19.1$  (*c* = 2.12, CHCl<sub>3</sub>). **<sup>1</sup>H NMR** (400 MHz, CDCl<sub>3</sub>) δ 8.36 (d, *J* = 8.7 Hz, 2H), 8.01 (d, *J* = 8.8 Hz, 2H), 7.75 (dd, *J* = 8.5, 5.2 Hz, 1H), 7.23 – 7.05 (m, 2H), 5.62 (dd, *J* = 8.9, 4.4 Hz, 1H), 3.55 – 3.38 (m, 3H), 3.22 (dd, *J* = 12.8, 9.1 Hz, 1H), 1.33 (s, 9H). **<sup>13</sup>C NMR** (100 MHz, CDCl<sub>3</sub>) δ 198.9, 169.7, 167.8 (d, <sup>1</sup>*J*<sub>C-F</sub> = 258.2 Hz), 156.2 (d, <sup>3</sup>*J*<sub>C-F</sub> = 10.4 Hz), 150.1, 145.4, 131.1, 128.2, 127.3 (d, <sup>3</sup>*J*<sub>C-F</sub> = 11.5 Hz), 124.5, 116.6 (d, <sup>2</sup>*J*<sub>C-F</sub> = 24.2 Hz), 113.5 (d, <sup>2</sup>*J*<sub>C-F</sub> = 23.0 Hz), 83.6, 61.0, 46.3, 35.7, 27.7. **HRMS (ESI)** *m/z*: [M + Na]<sup>+</sup> Calcd for C<sub>21</sub>H<sub>21</sub>FN<sub>2</sub>NaO<sub>7</sub>S 487.0956; Found 487.0951. **Melting point:** 155.6-156.6 °C.

## 9. Gram-scale synthesis and synthetic applications

### 9.1 Gram-scale synthesis of compounds 4s, 4i, and 6b

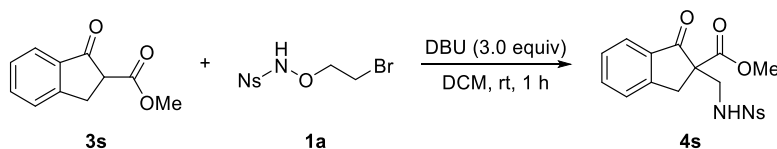

To a solution of **3s** (1.9 g, 10 mmol, 2.0 equiv) and DBU (2.3 g, 15 mmol, 3.0 equiv) in DCM (25 mL) was added the solution of **1a** (1.6 g, 5 mmol, 1.0 equiv) in DCM (25 mL) at room temperature over 10 minutes. The reaction mixture was stirred at the same temperature for 1 h. After completion, the solution was quenched with saturated NH<sub>4</sub>Cl (20 mL) and extracted with DCM (40 mL x 3). The combined organic layers were dried over anhydrous Na<sub>2</sub>SO<sub>4</sub> and concentrated in vacuum. The residue was purified by flash silica gel chromatography (petroleum ether/EtOAc = 8/1) to afford the product **4s** as a white solid (1.83 g, 91% yield).

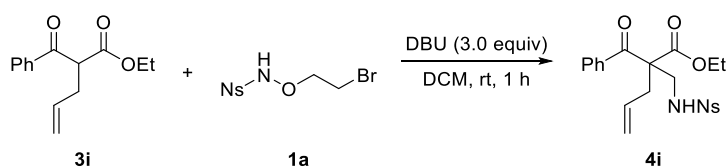

To a solution of **3i** (1.86 g, 8 mmol, 2.0 equiv) and DBU (1.81 g, 12 mmol, 3.0 equiv) in DCM (20 mL) was added the solution of **1a** (1.3 g, 4 mmol, 1.0 equiv) in DCM (20 mL) at room temperature over 10 minutes. The reaction mixture was stirred at the same temperature for 1 h. After completion, the solution was quenched with saturated NH<sub>4</sub>Cl (20 mL) and extracted with DCM (30 mL x 3). The combined organic layers were dried over anhydrous Na<sub>2</sub>SO<sub>4</sub> and concentrated in vacuum. The residue was purified by flash silica gel chromatography (petroleum ether/EtOAc = 8/1) to afford the product **4i** as a white solid (1.4 g, 78% yield).

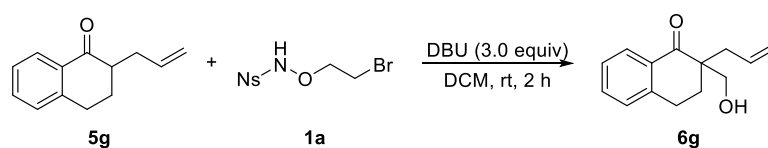

To a solution of  $\alpha$ -substituted ketone **5g** (1.86 g, 10 mmol, 1.0 equiv) and DBU (4.54 g, 30 mmol, 3.0 equiv) in DCM (30 mL) was added the solution of **1a** (4.88 g, 15 mmol, 1.5 equiv) in DCM (30 mL) at room temperature over 10 min. The reaction mixture was stirred at the same temperature for 2 h. After completion, the solution was quenched with saturated NH<sub>4</sub>Cl (20 mL) and extracted with DCM (30 mL x 3). The combined organic layers were dried over Na<sub>2</sub>SO<sub>4</sub> and concentrated in vacuum. The residue was purified by flash silica gel chromatography (petroleum ether/EtOAc = 8/1) to afford the product **6g** as a colorless oil (1.13 g, 52% yield).

## 9.2 Synthetic applications

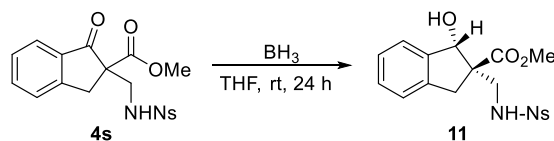

To a solution of **4s** (81 mg, 0.2 mmol, 1.0 equiv) in anhydrous THF (2 mL) was added dropwise of borane (1.0 M solution in THF, 0.4 mL, 0.4 mmol, 2.0 equiv) at room temperature under an N<sub>2</sub> atmosphere. After stirring for 24 h at the same temperature, the mixture was quenched with EtOH (2 mL) and concentrated. The residue was diluted with H<sub>2</sub>O (3 mL) and extracted with EtOAc (5 mL x 3). The combined organic layers were dried over Na<sub>2</sub>SO<sub>4</sub> and concentrated in vacuum. The

residue was purified by flash silica gel chromatography (petroleum ether/EtOAc = 5/1) to afford the product **11** as a white solid (50 mg, 61% yield). <sup>1</sup>H NMR (400 MHz, CDCl<sub>3</sub>) δ 8.31 (d, *J* = 8.6 Hz, 2H), 7.97 (d, *J* = 8.6 Hz, 2H), 7.39 – 7.30 (m, 1H), 7.30 – 7.21 (m, 2H), 7.20 – 7.08 (m, 1H), 5.82 – 5.73 (m, 1H), 5.72 – 5.65 (m, 1H), 3.73 (s, 3H), 3.42 – 3.28 (m, 2H), 3.23 (d, *J* = 16.4 Hz, 1H), 3.13 – 2.97 (m, 2H). <sup>13</sup>C NMR (100 MHz, CDCl<sub>3</sub>) δ 174.8, 149.9, 145.6, 141.3, 138.2, 128.9, 128.2, 127.5, 124.7, 124.4, 124.2, 79.2, 58.3, 52.8, 45.7, 38.1. **HRMS (ESI)** *m/z*: [M + Na]<sup>+</sup> Calcd for C<sub>18</sub>H<sub>18</sub>N<sub>2</sub>NaO<sub>7</sub>S 429.0727; Found 429.0730. **Melting point:** 110.3-112.1 °C.

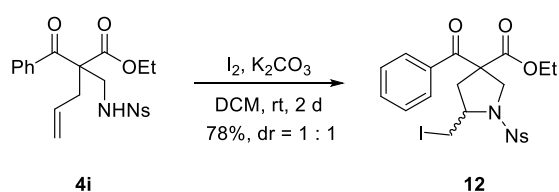

K<sub>2</sub>CO<sub>3</sub> (83 mg, 0.6 mmol, 3.0 equiv) and I<sub>2</sub> (152 mg, 0.6 mmol, 3.0 equiv) were added to a solution of the **4i** (89 mg, 0.2 mmol, 1.0 equiv) in DCM (4 mL) at room temperature. The reaction mixture was stirred at the same temperature for 2 days. Then, a saturated aqueous solution of Na<sub>2</sub>S<sub>2</sub>O<sub>3</sub> (5 mL) was added, the phases were separated and the aqueous phase was extracted with DCM (5 mL x 3). The organic phases were combined, washed with brine (3mL), dried over Na<sub>2</sub>SO<sub>4</sub> and concentrated in vacuum. The residue was purified by flash silica gel chromatography (petroleum ether/EtOAc = 8/1) to afford the product **12** as a white solid (89 mg, 78% yield, dr = 1:1). <sup>1</sup>H NMR (400 MHz, CDCl<sub>3</sub>) δ 8.44 – 8.34 (m, 1H), 8.11 – 8.01 (m, 2H), 7.81 – 7.71 (m, 2H), 7.63 – 7.52 (m, 1H), 7.52 – 7.39 (m, 2H), 7.40 – 7.30 (m, 1H), 4.40 (dd, *J* = 12.2, 2.5 Hz, 0.56H), 4.20 (dd, *J* = 12.0, 2.4 Hz, 0.36H), 4.17 – 4.00 (m, 2.56H), 3.97 – 3.79 (m, 1.39H), 3.73 – 3.63 (m, 0.57H), 3.61 – 3.47 (m, 1H), 3.46 – 3.36 (m, 0.38H), 3.06 – 2.83 (m, 1H), 2.37 (ddd, *J* = 13.6, 7.8, 2.7 Hz, 0.4H), 2.22 (ddd, *J* = 13.5, 8.0, 2.6 Hz, 0.56H), 1.03 – 0.88 (m, 3H). <sup>13</sup>C NMR (100 MHz, CDCl<sub>3</sub>) δ 192.2, 191.8, 170.8, 170.0, 150.2, 150.1, 143.9, 142.4, 134.3, 134.1, 133.9, 132.4, 128.9, 128.7, 128.7, 128.6, 128.5, 128.4, 124.4, 124.1, 62.5, 62.5, 62.1, 61.3, 60.5, 60.2, 54.8, 54.7, 40.6, 40.0, 13.6, 13.5, 11.6, 10.9. **HRMS (ESI)** *m/z*: [M + Na]<sup>+</sup> Calcd for C<sub>21</sub>H<sub>21</sub>IN<sub>2</sub>NaO<sub>7</sub>S 595.0006; Found 595.0019. **Melting point:** 111.7-113.5

°C.

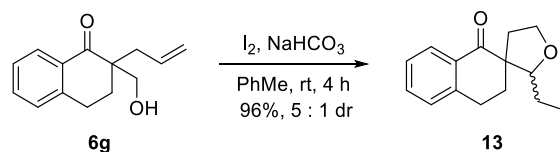

NaHCO<sub>3</sub> (50 mg, 0.6 mmol, 3.0 equiv) and I<sub>2</sub> (127 mg, 0.5 mmol, 2.5 equiv) were added to a solution of **6g** (43 mg, 0.2 mmol, 1.0 equiv) in PhMe (2 mL) at room temperature. The reaction mixture was stirred at the same temperature for 4 h. Then, a saturated aqueous solution of Na<sub>2</sub>S<sub>2</sub>O<sub>3</sub> (5 mL) was added, the phases were separated and the aqueous phase was extracted with DCM (5 mL x 3). The organic phases were combined, washed with brine (3mL), dried over Na<sub>2</sub>SO<sub>4</sub> and concentrated in vacuum. The residue was purified by flash silica gel chromatography (petroleum ether/EtOAc = 15/1) to afford the product **13** as a brown oil (66 mg, 96% yield, dr = 5:1). <sup>1</sup>H NMR (400 MHz, CDCl<sub>3</sub>) δ 8.04 (d, *J* = 7.7 Hz, 1H), 7.47 (t, *J* = 6.9 Hz, 1H), 7.31 (t, *J* = 7.1 Hz, 1H), 7.22 (d, *J* = 7.6 Hz, 1H), 4.37 – 4.26 (m, 0.18H), 4.25 – 4.10 (m, 1.94H), 3.93 (d, *J* = 8.8 Hz, 0.89H), 3.85 (d, *J* = 8.9 Hz, 0.18H), 3.42 – 3.25 (m, 2H), 3.07 – 2.91 (m, 2H), 2.57 (dd, *J* = 12.6, 6.4 Hz, 0.95H), 2.33 (dd, *J* = 12.9, 7.5 Hz, 0.15H), 2.26 – 2.19 (m, 2H), 2.09 (dd, *J* = 12.9, 7.1 Hz, 0.17H), 1.59 (dd, *J* = 12.6, 8.9 Hz, 0.9H). <sup>13</sup>C NMR (100 MHz, CDCl<sub>3</sub>) δ 199.1, 198.3, 143.0, 143.0, 133.6, 131.4, 131.0, 128.6, 128.0, 126.8, 79.5, 78.5, 75.2, 75.1, 54.6, 42.1, 40.7, 33.4, 32.4, 26.7, 26.1, 10.2, 8.5. HRMS (ESI) *m/z*: [M + Na]<sup>+</sup> Calcd for C<sub>14</sub>H<sub>15</sub>INaO<sub>2</sub> 365.0009; Found: 365.0010.

## 10. Determination of the relative configuration of compound 11

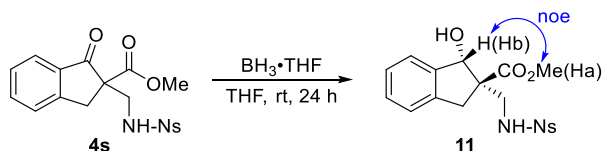

NOE analysis was used to determine the relative configuration of compound **11**. As shown in **Figure S15**, when selecting to irradiate Ha (OMe) proton signal in compound **11**, a clear NOE effect between Hb and Ha (OMe) was observed. This result indicated the protons of Hb and Ha (CO<sub>2</sub>Me) are on the same side of the ring,



namely, they are mutually *cis* to each other.

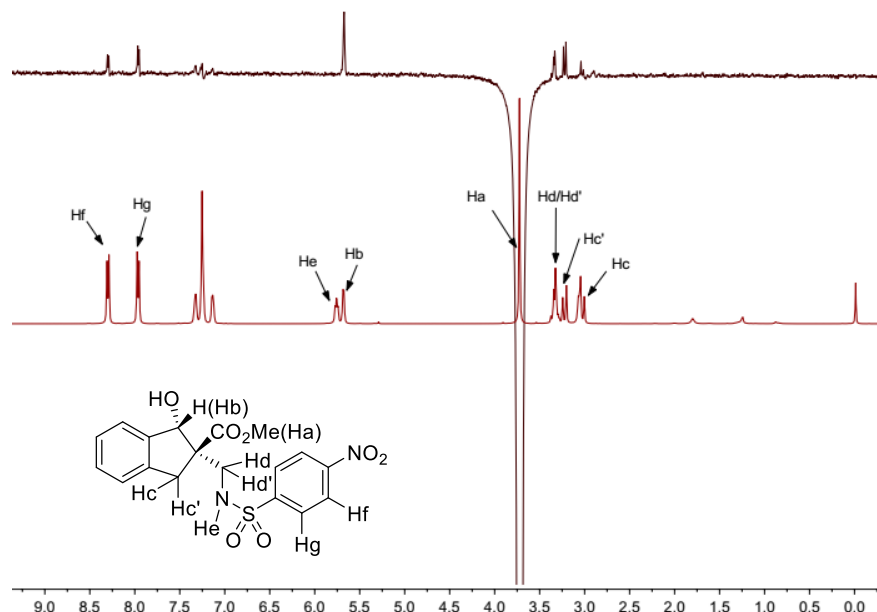

**Figure S15.** Comparison of the <sup>1</sup>H NMR and NOE spectra of compound 11

## 11. References

1. Wu, B.; Yang, J.; Gao, M.; Hu, L. *Org. Lett.* **2020**, *22*, 5561–5566.
2. Sheng, X.; Zhang, J.; Yang, H.; Jiang, G. *Org. Lett.* **2017**, *19*, 2618–2621.
3. Erhardt, H.; Kunz, K. A.; Kirsch, S. F. *Org. Lett.* **2017**, *19*, 178–181.
4. Enders, D.; Grossmann, A.; Huang, H.; Raabe, G. *Eur. J. Org. Chem.* **2011**, 4298–4301.
5. Granados, A.; Rivilla, I.; Cossó, F. P.; Vallribera, A. *Chem. Eur. J.* **2019**, *25*, 8214–8218.
6. Katritzky, A. R.; Wang, Z.; Wang, M.; Wilkerson, C. R.; Hall, C. D.; Akhmedov, N. G. *J. Org. Chem.* **2004**, *69*, 6617–6622.
7. Bertogg, A.; Hintermann, L.; Huber, D. P.; Perseghini, M.; Sanna, M.; Togni, A. *Helv. Chim. Acta.* **2012**, *95*, 353–403.
8. Singh, K.; Okombo, J.; Brunschwig, C.; Ndubi, F.; Barnard, L.; Wilkinson, C.; Njogu, P. M.; Njoroge, M.; Lizahn, L.; Machado, M.; Prudêncio, M.; Reader, J.; Botha, M.; Nondaba, S.; Birkholtz, L.; Lauterbach, S.; Churchyard, A.; Coetzer, T. L.; Burrows, J. N.; Yeates, C.; Denti, P.; Wiesner, L.; Egan, T. J.; Wittlin, S.;

- Chibale, K. *J. Med. Chem.* **2017**, *60*, 1432–1448.
9. Shneider, O. S.; Pisarevsky, E.; Fristrup, P.; Szpilman, A. M. *Org. Lett.* **2015**, *17*, 282–285.
10. Drouhin, P.; Taylor, R. J. *Eur. J. Org. Chem.* **2015**, 2333–2336.
11. Terent'ev, A. O.; Borisov, D. A.; Yaremenko, I. A.; Chernyshev, V. V.; Nikishin, G. *I. J. Org. Chem.* **2010**, *75*, 5065–5071.
12. Zhang, X.; Jia, X.; Fang, L.; Liu, N.; Wang, J.; Fan, X. *Org. Lett.* **2011**, *13*, 5024–5027.
13. Popović-Djordjević, J.; Stepanović, S.; Došen-Mićović, L.; Ivanović, E.; Ivanović, M. D. *Green Chem. Lett. Rev.* **2016**, *9*, 61–68.
14. Ko, T. Y.; Youn, S. W. *Adv. Synth. Catal.* **2016**, 358, 1934–1941.
15. Poisson, T.; Dalla, V.; Marsais, F.; Dupas, G.; Oudeyer, S.; Levacher, V. *Angew. Chem. Int. Ed.* **2007**, *46*, 7090–7093.
16. Guan, X.; Luo, P.; He, Q.; Hu, Y.; Ying, H. *Molecules.* **2017**, *22*, 32–48.
17. Adamczyk, M.; Watt, D. S.; Netzel, D. A. *J. Org. Chem.* **1984**, *49*, 4226–4237.
18. Zhao, X.; Liu, D.; Guo, H.; Liu, Y.; Zhang, W. *J. Am. Chem. Soc.* **2011**, *133*, 19354–19357.
19. Konkol, L. C.; Jones, B. T.; Thomson, R. J. *Org. Lett.* **2009**, *11*, 5550–5553.
20. Crich, D.; Eustace, K. A.; Fortt, S. M.; Ritchie, T. J. *Tetrahedron* **1990**, *46*, 2135–2148.
21. Nelson, H. M.; Patel, J. S.; Shunatona, H. P.; Toste, F. D. *Chem. Sci.* **2015**, *6*, 170–173.
22. Bauer, L.; Suresh, K. S. *J. Org. Chem.* **1963**, *28*, 1604–1608.
23. Javorskis, T.; Sriubaitė, S.; Bagdžiūnas, G.; Orentas, E. *Chem. Eur. J.* **2015**, *21*, 9157–9164.
24. Lu, X.; Zhang, J.; Xu, L.; Shen, W.; Yu, F.; Ding, L.; Zhong, G. *Org. Lett.* **2020**, *22*, 5610–5616.
25. Deguest, G.; Bischoff, L.; Fruit, C.; Marsais, F. *Org. Lett.* **2007**, *9*, 1165–1167.
26. Vaidya, V. V.; Wankhede, K. S.; Salunkhe, M. M.; Trivedi, G. K. *Synth. Commun.* **2008**, *38*, 2392–2403.

## 12. Spectra data for the new compounds

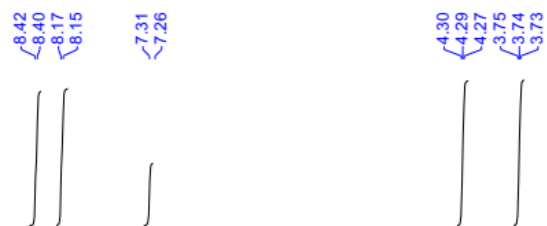

$^1\text{H}$  NMR (400 MHz,  $\text{CDCl}_3$ )

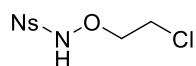

1e

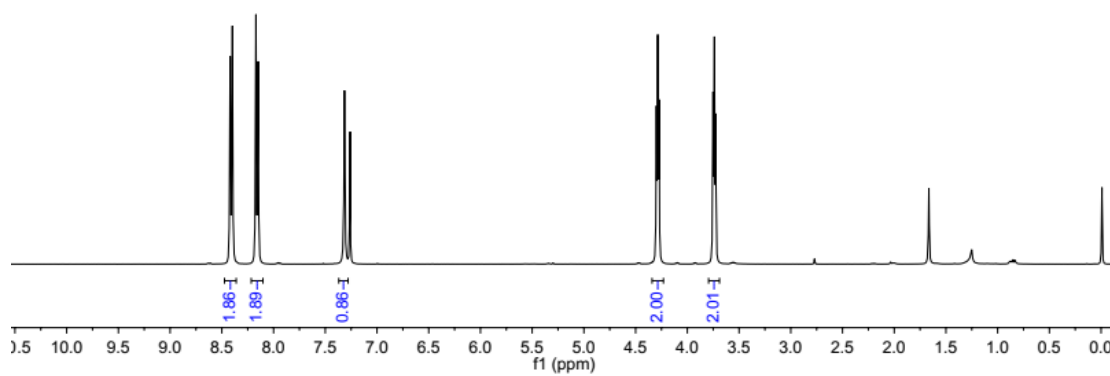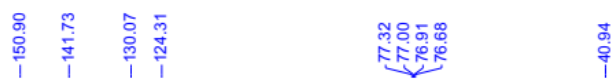

$^{13}\text{C}$  NMR (100 MHz,  $\text{CDCl}_3$ )

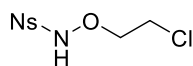

1e

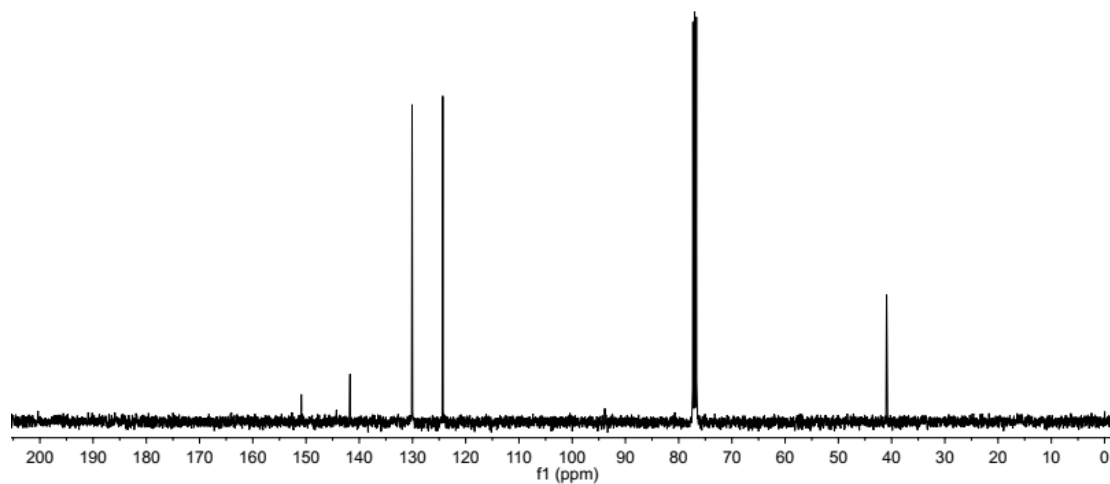

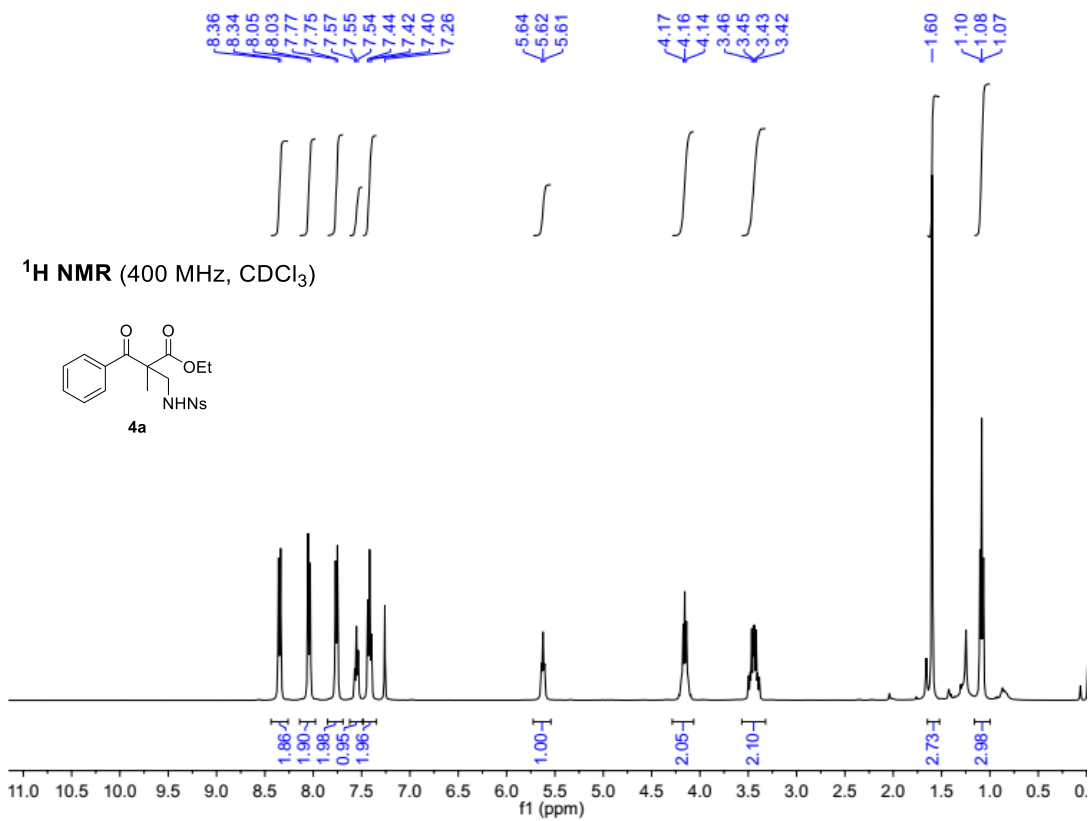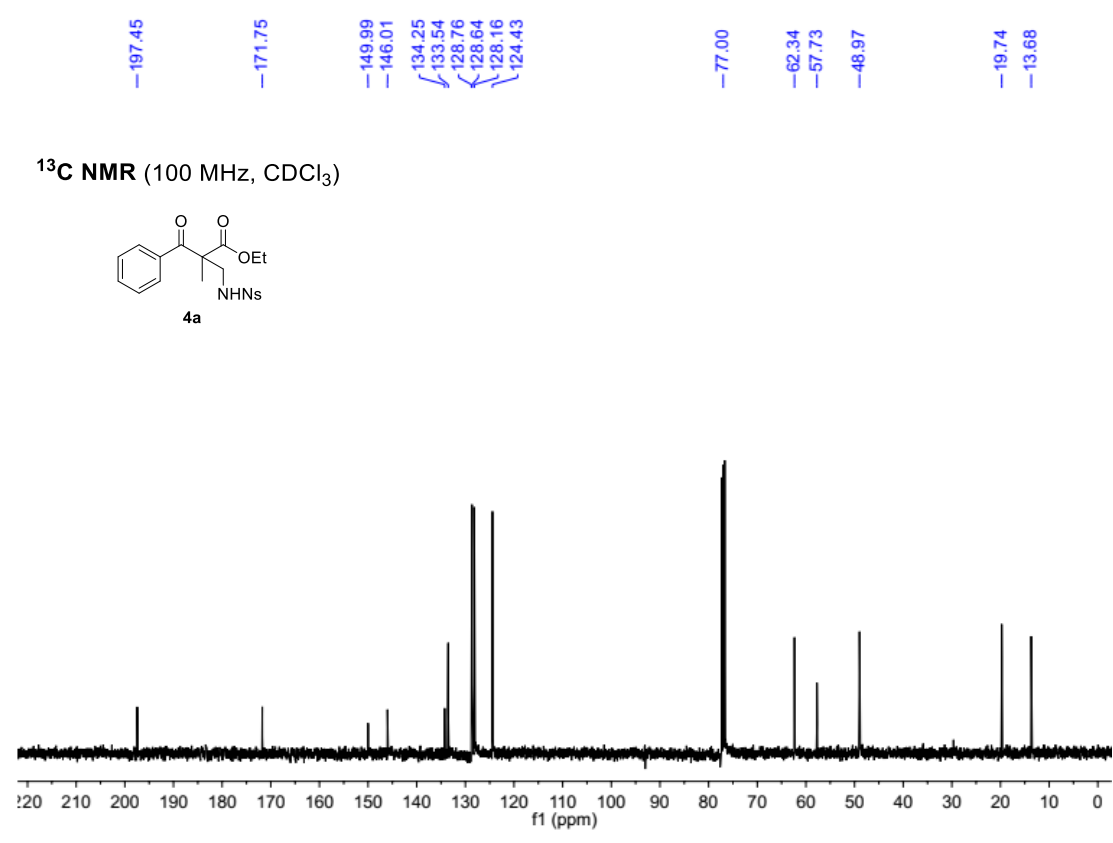

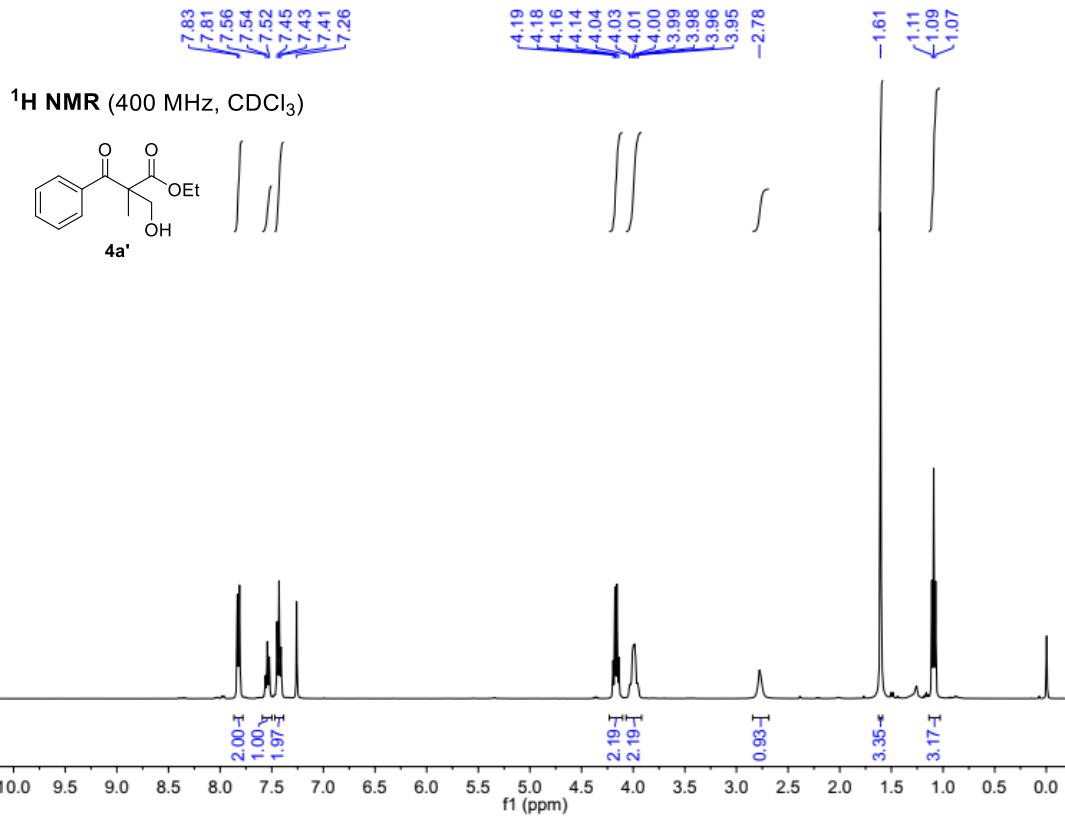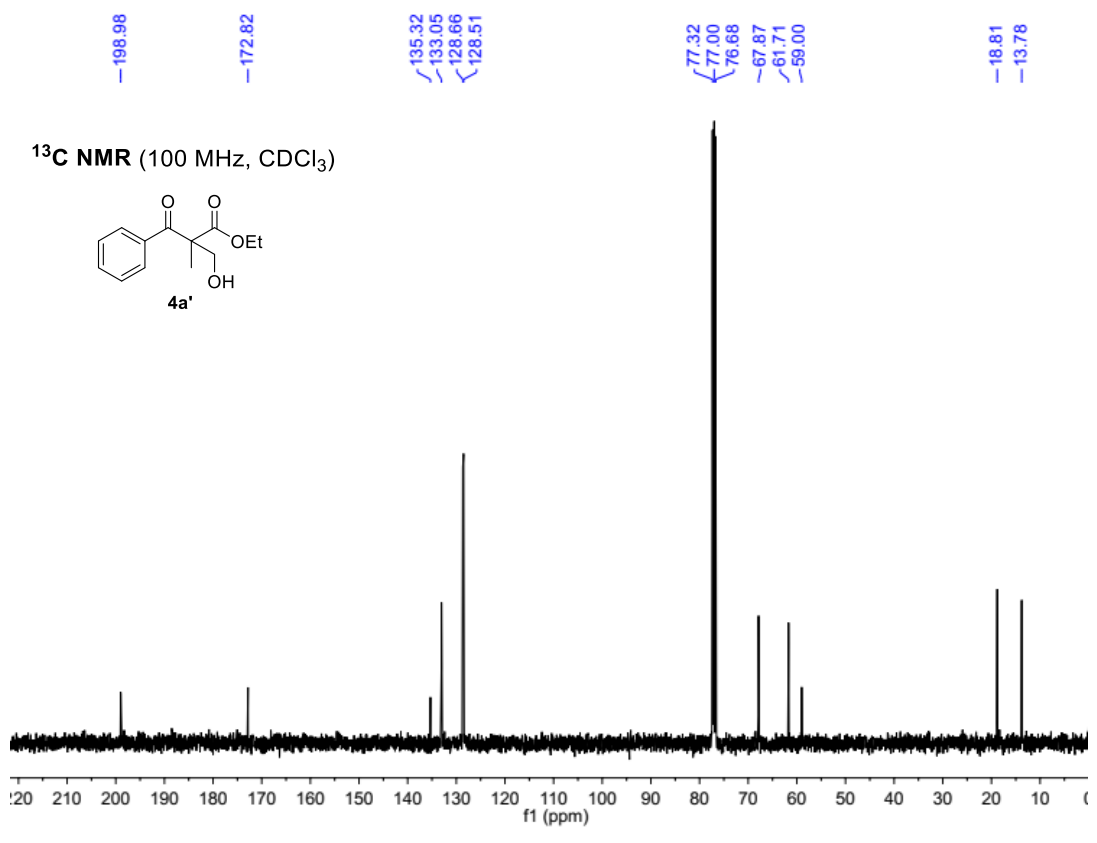

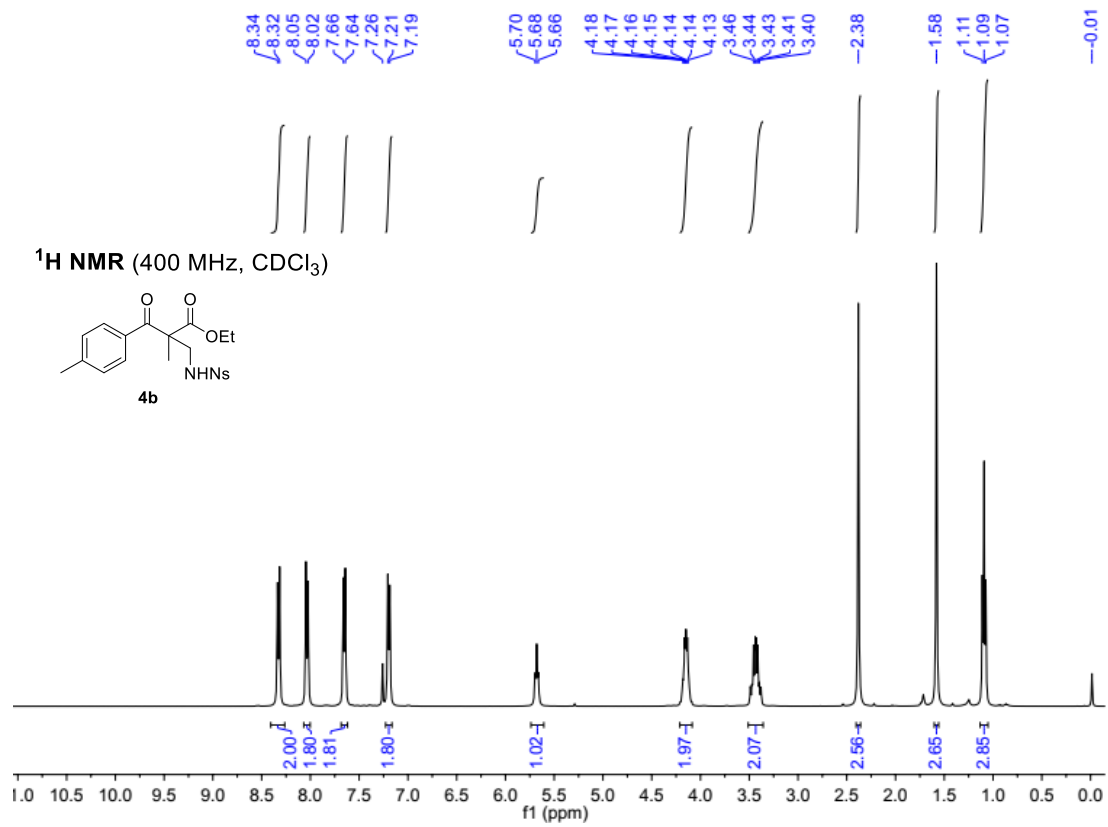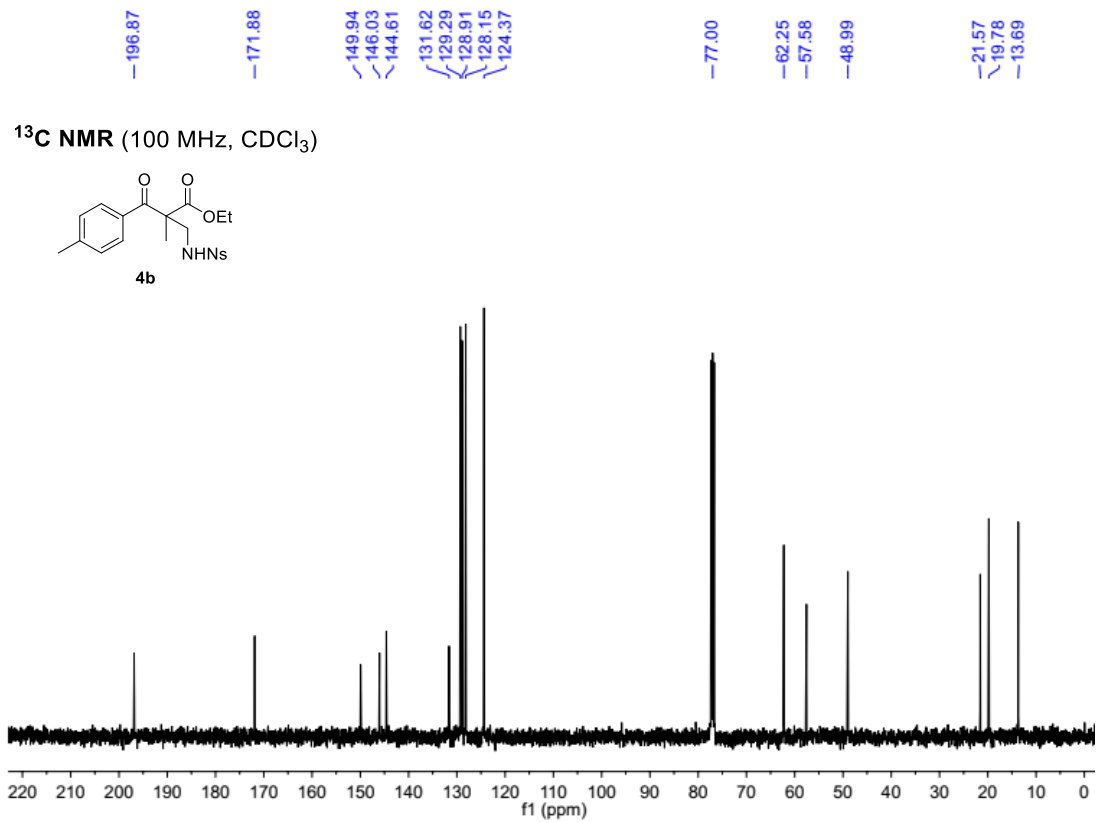

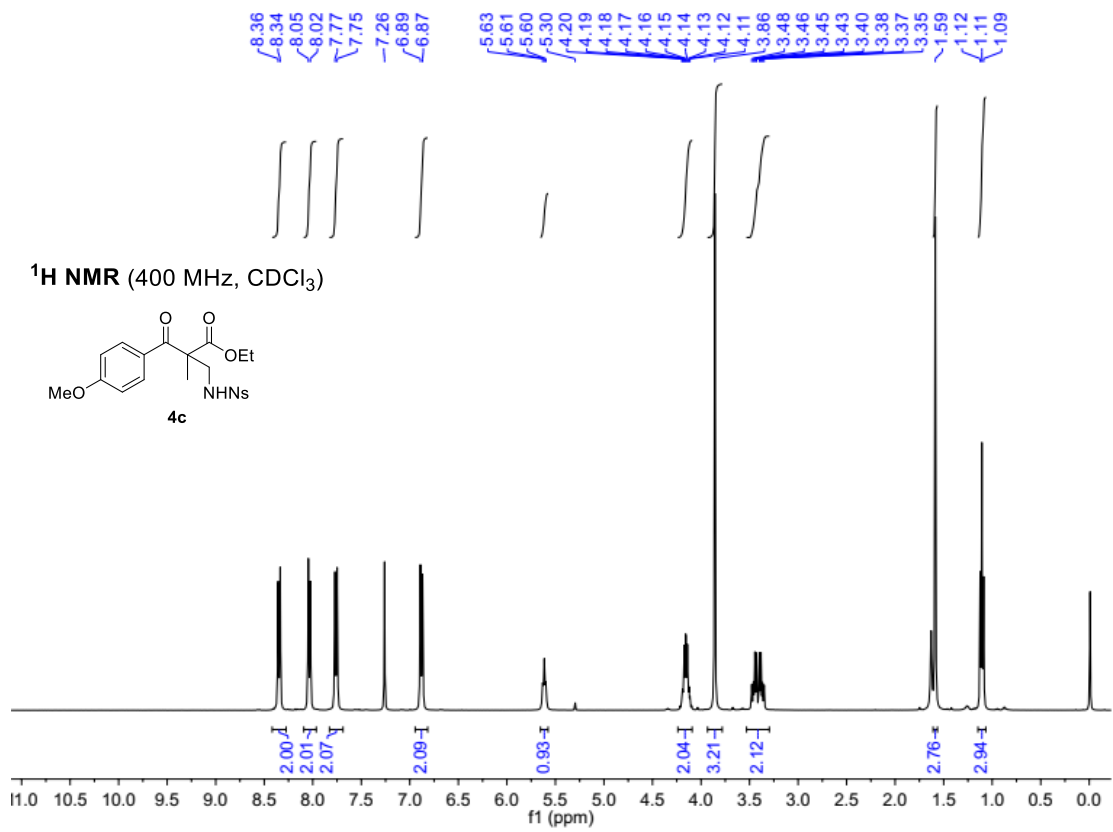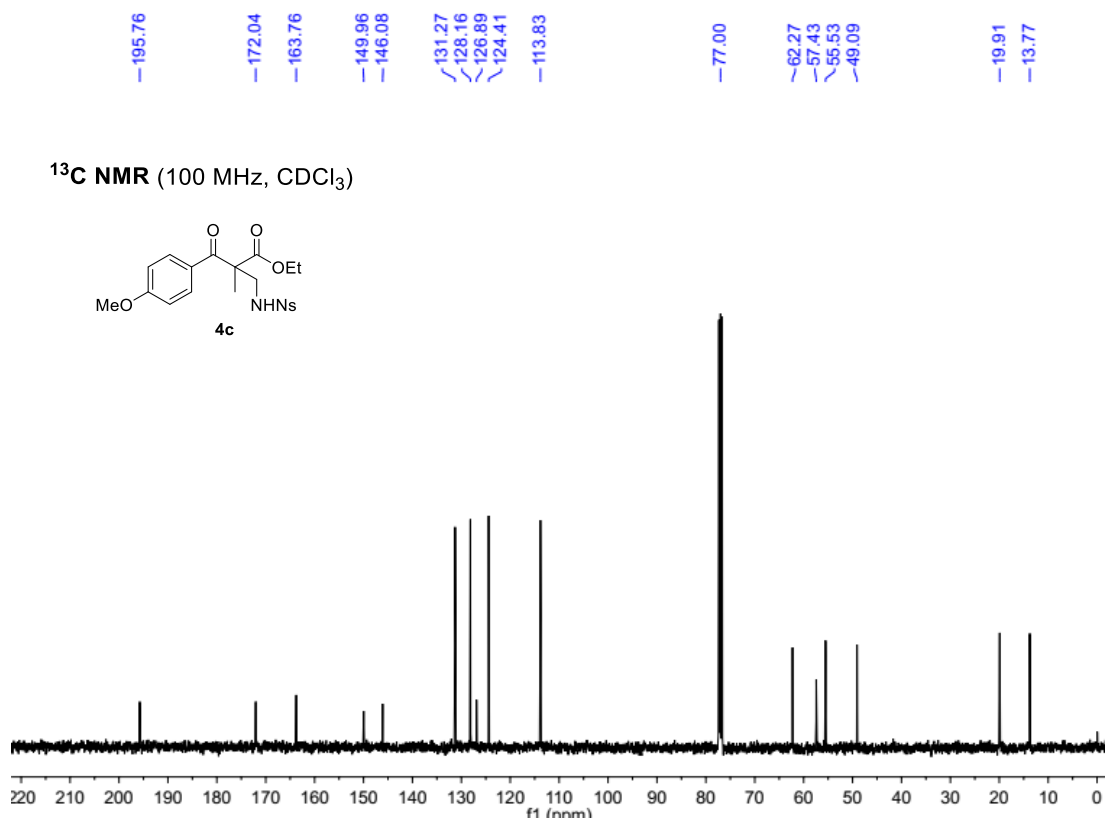

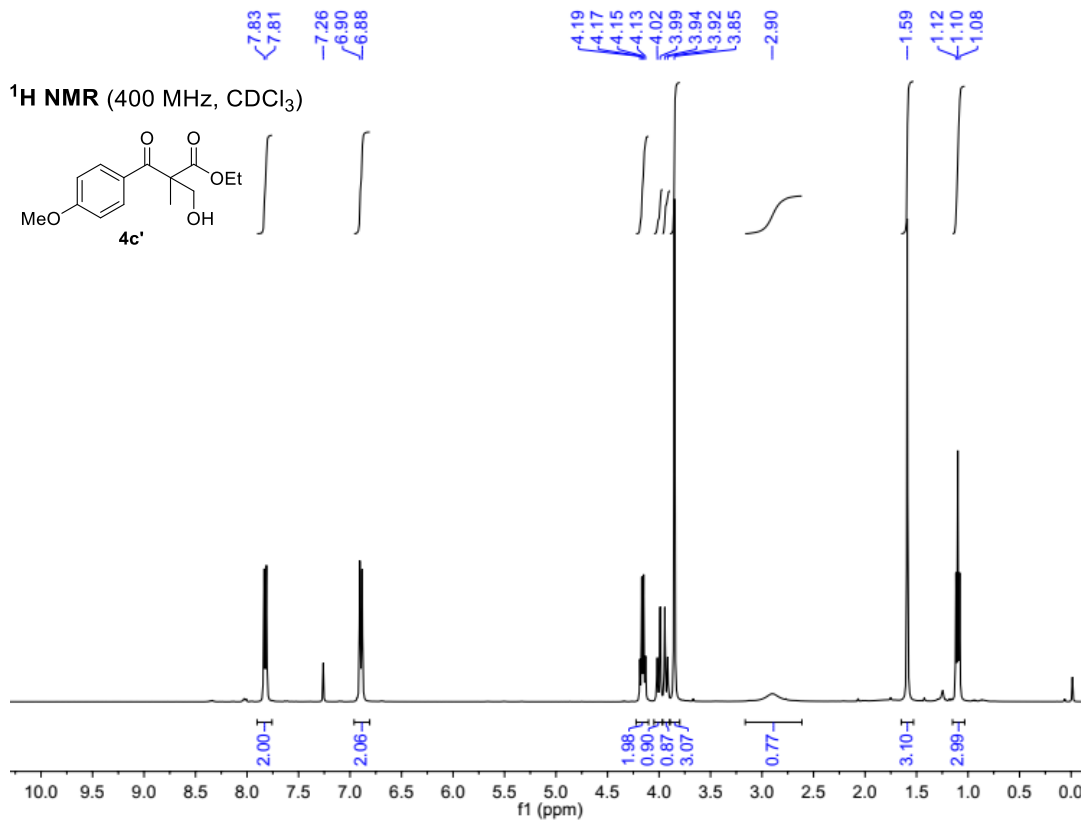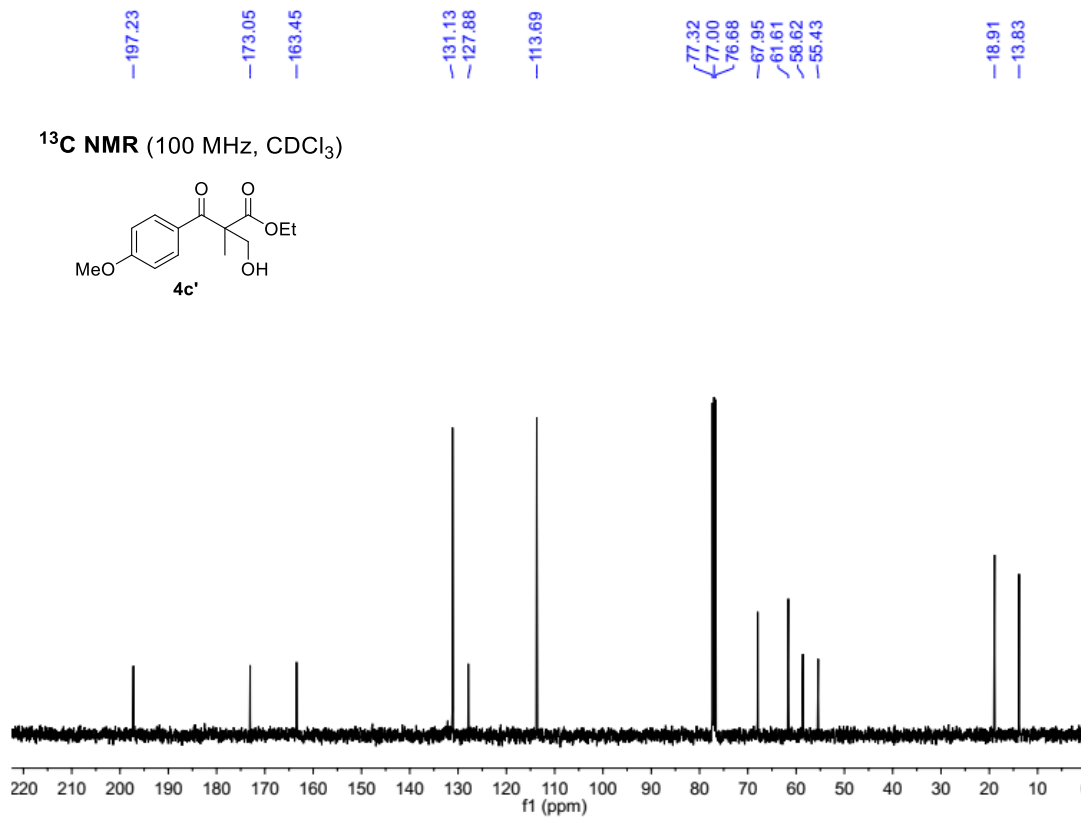



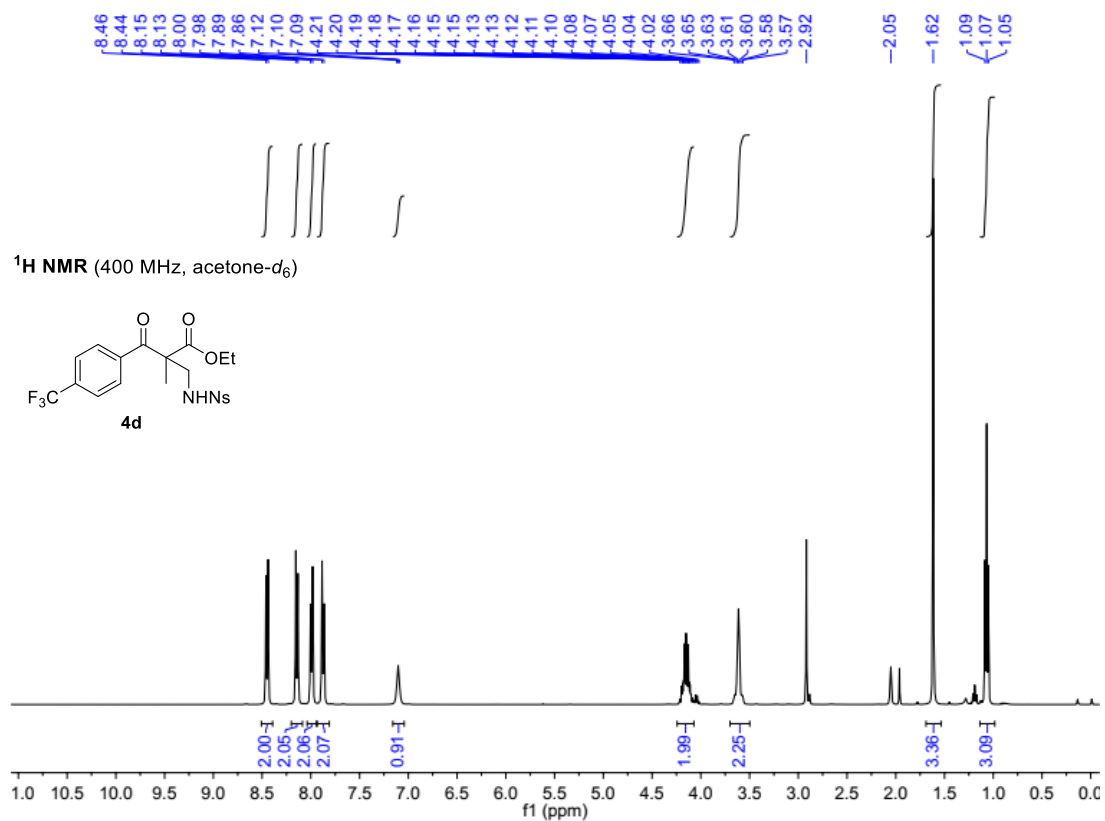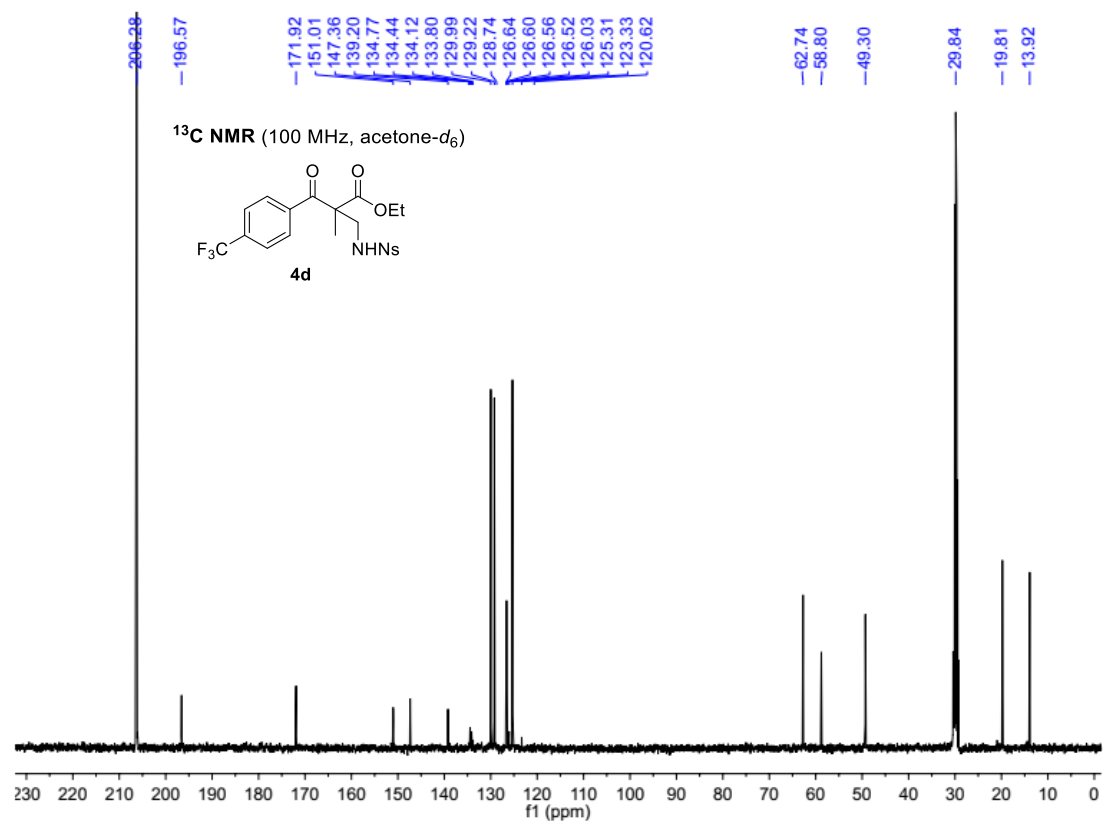

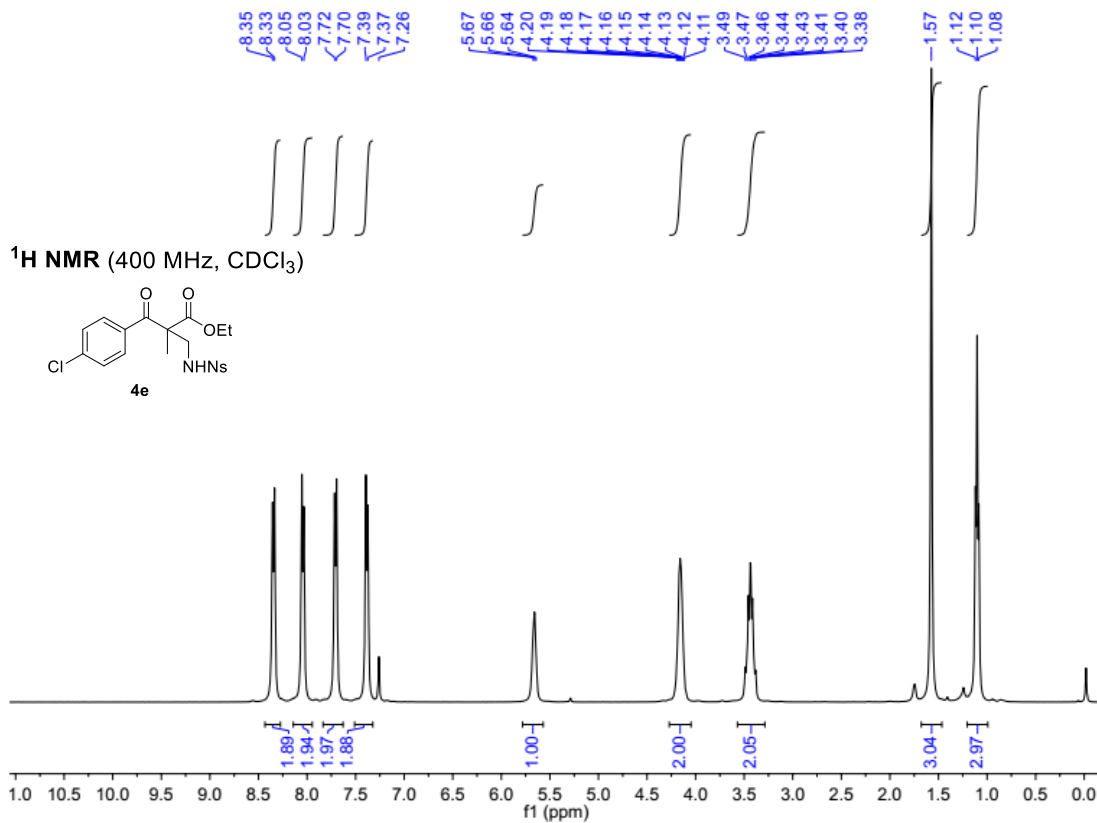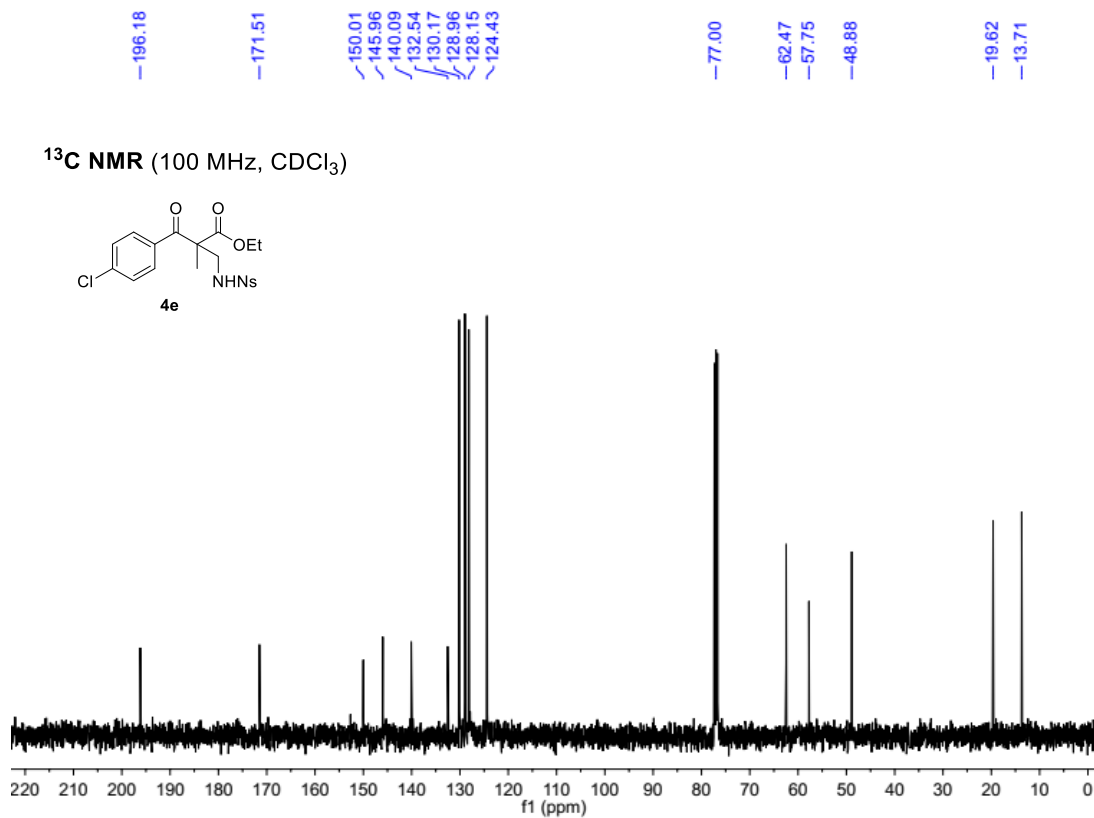

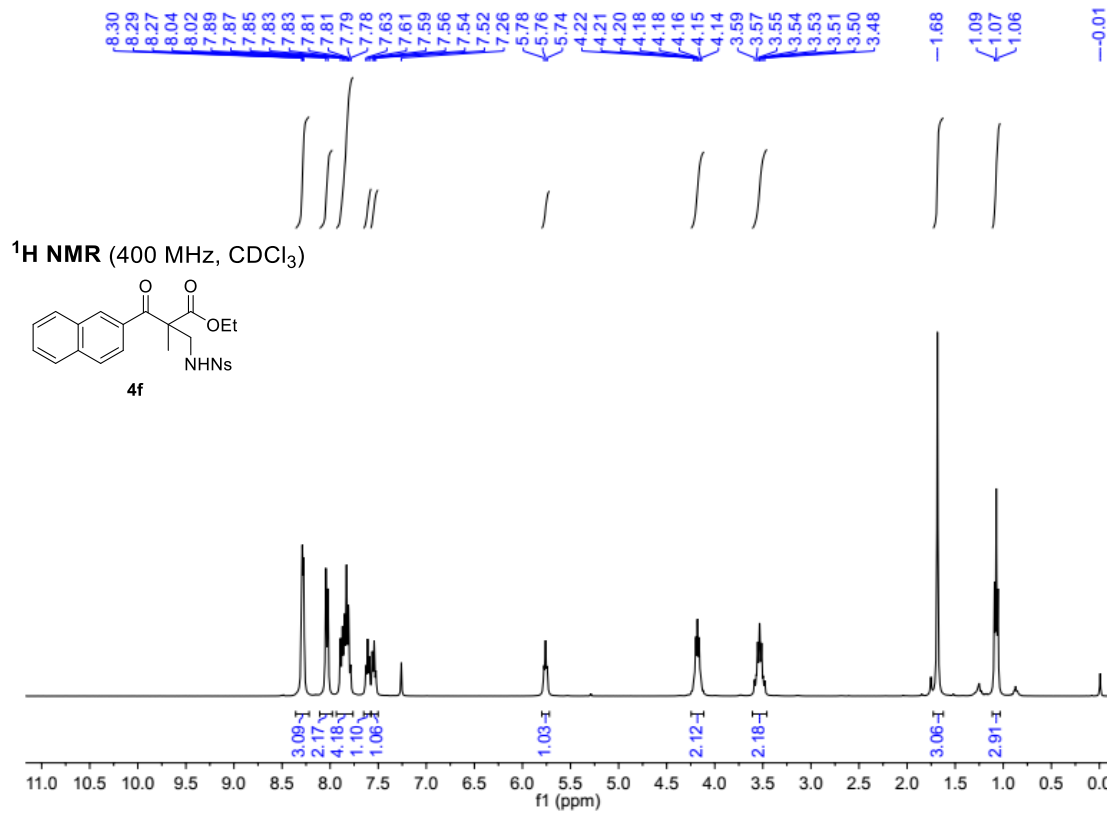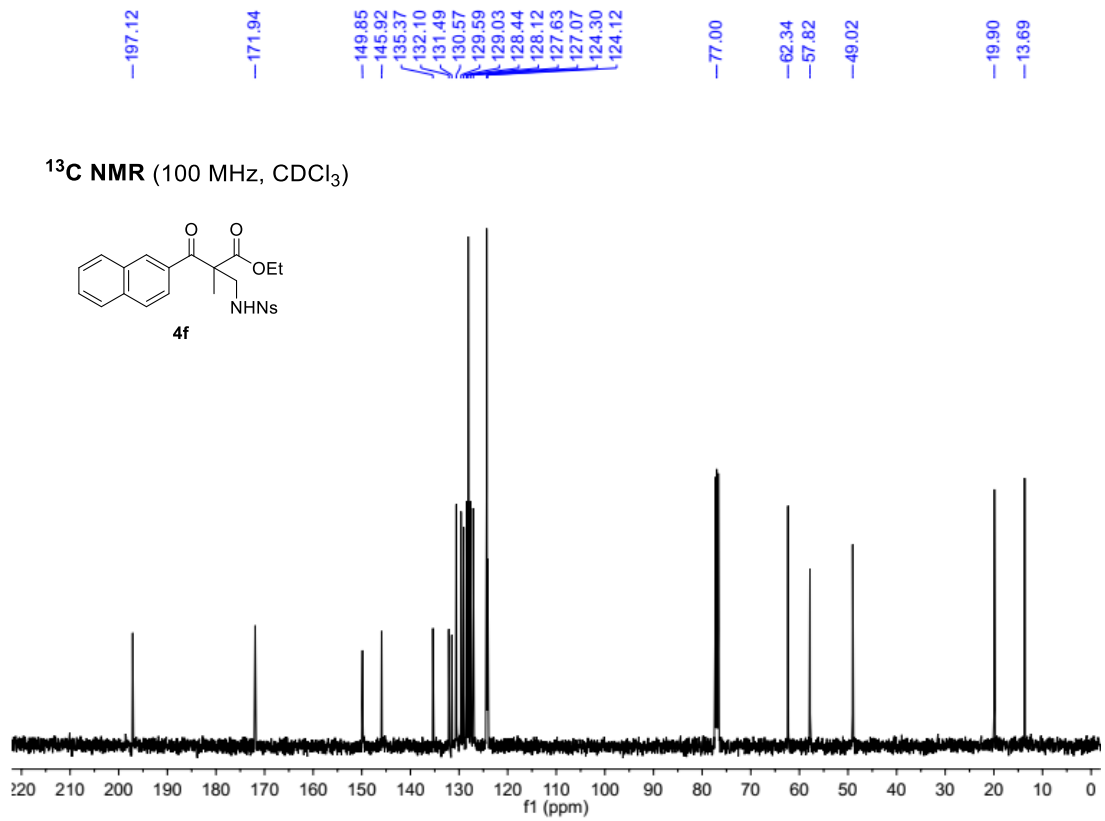

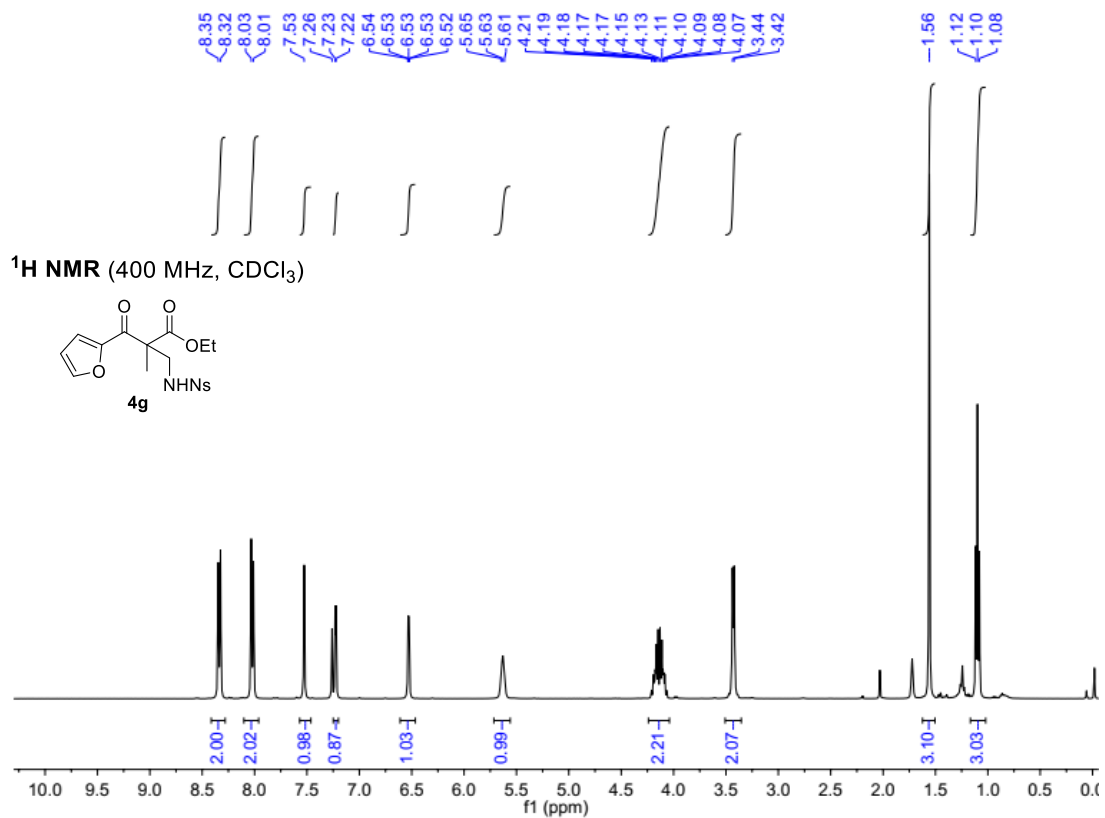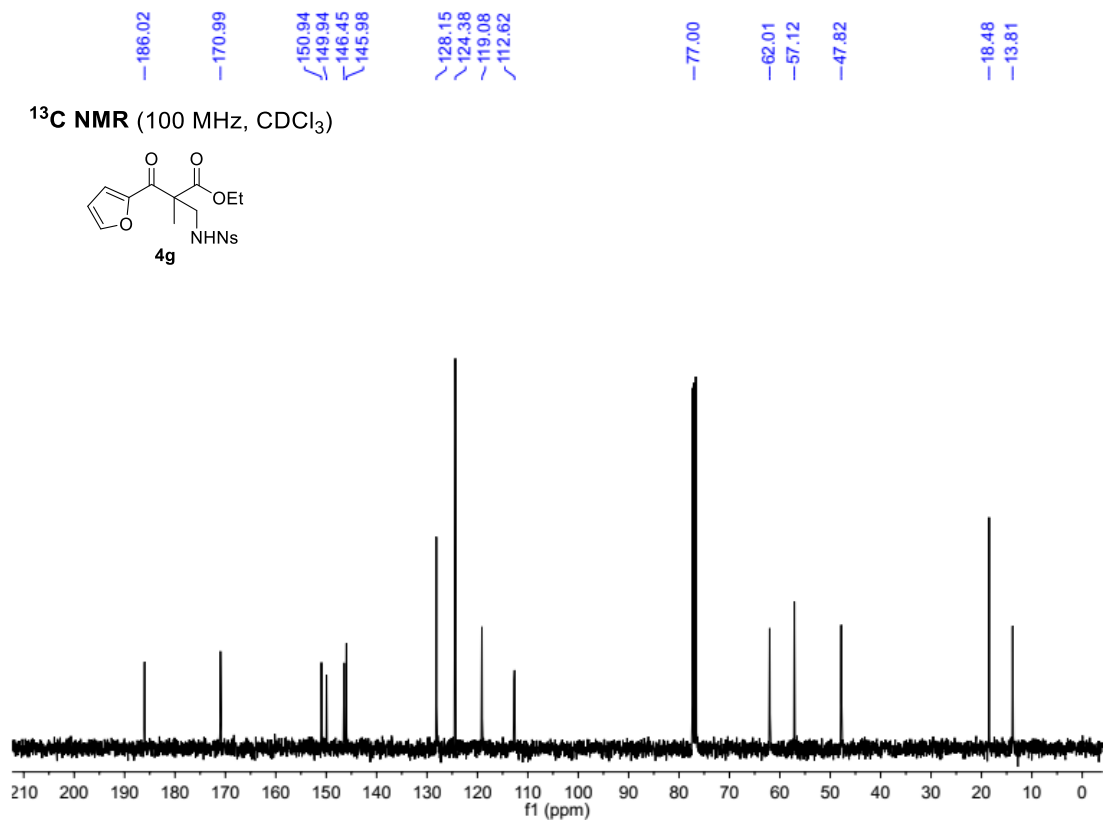

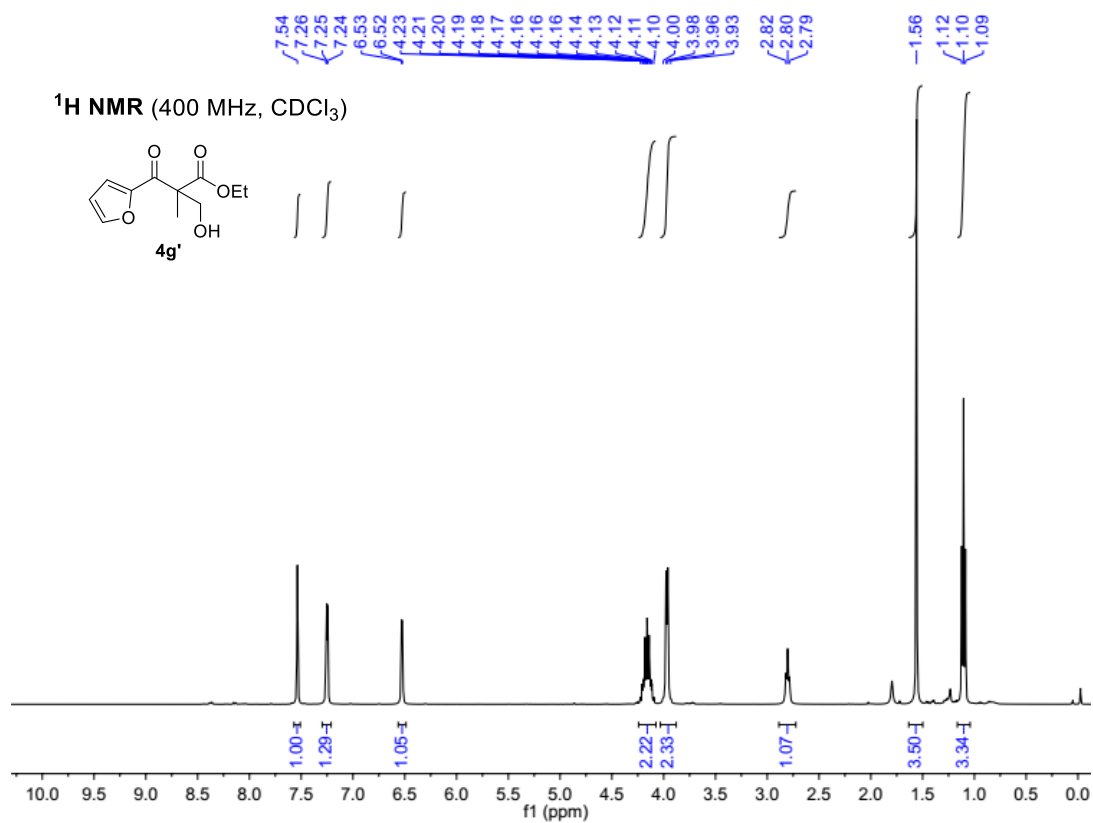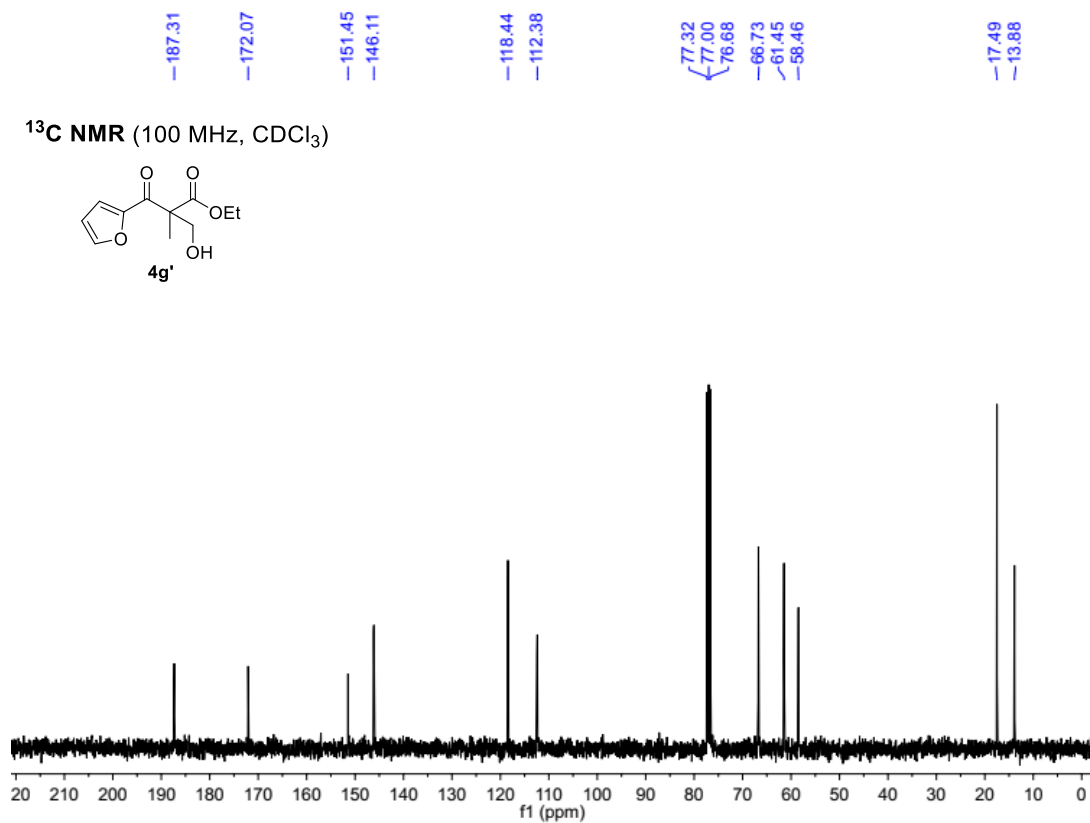

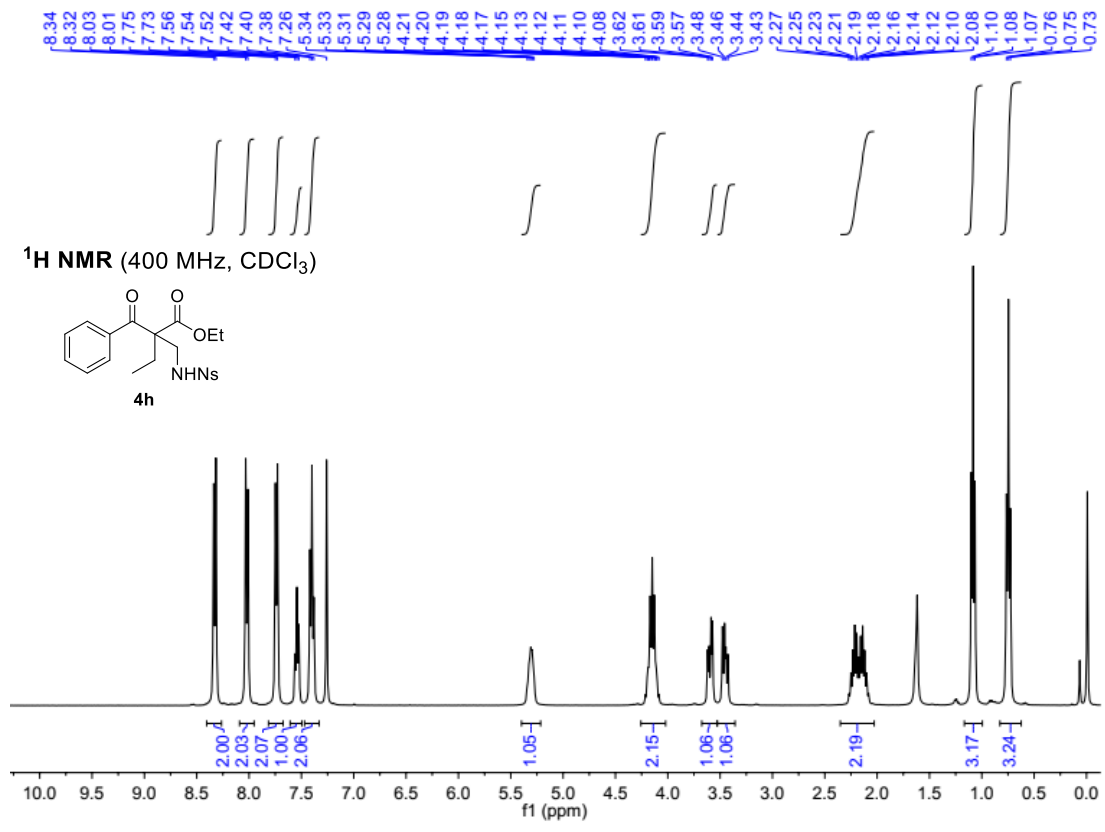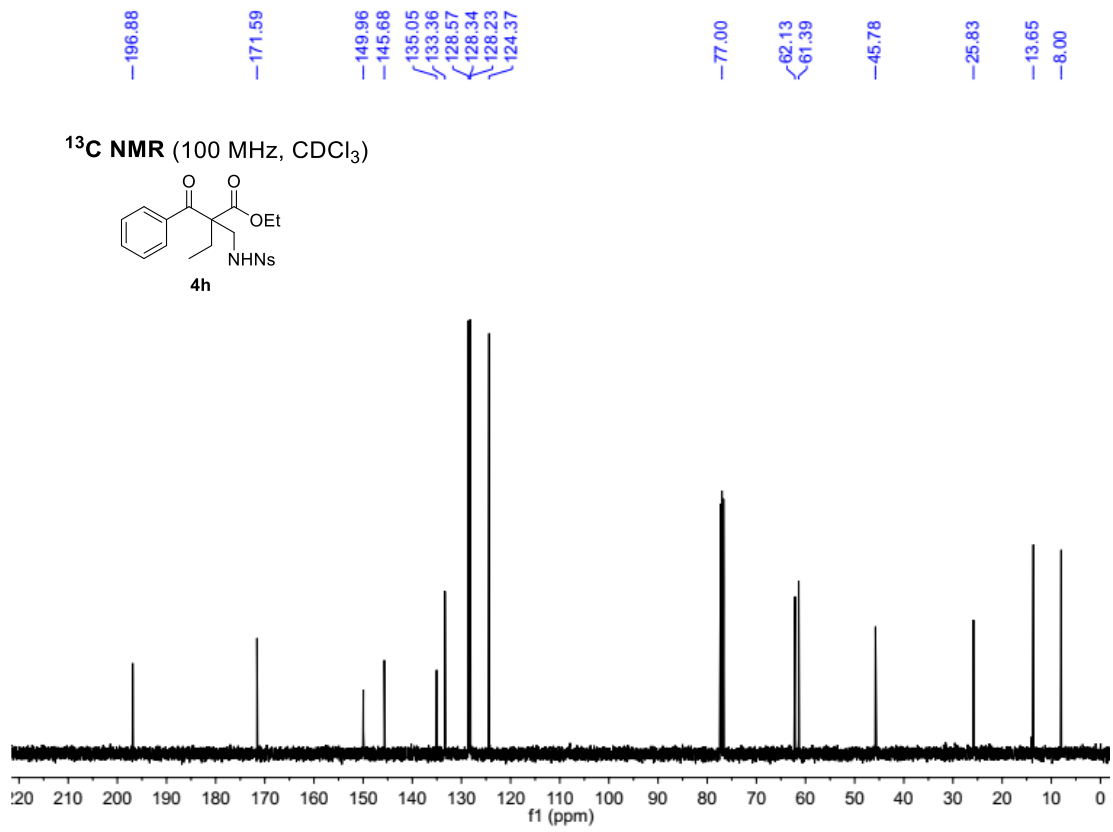

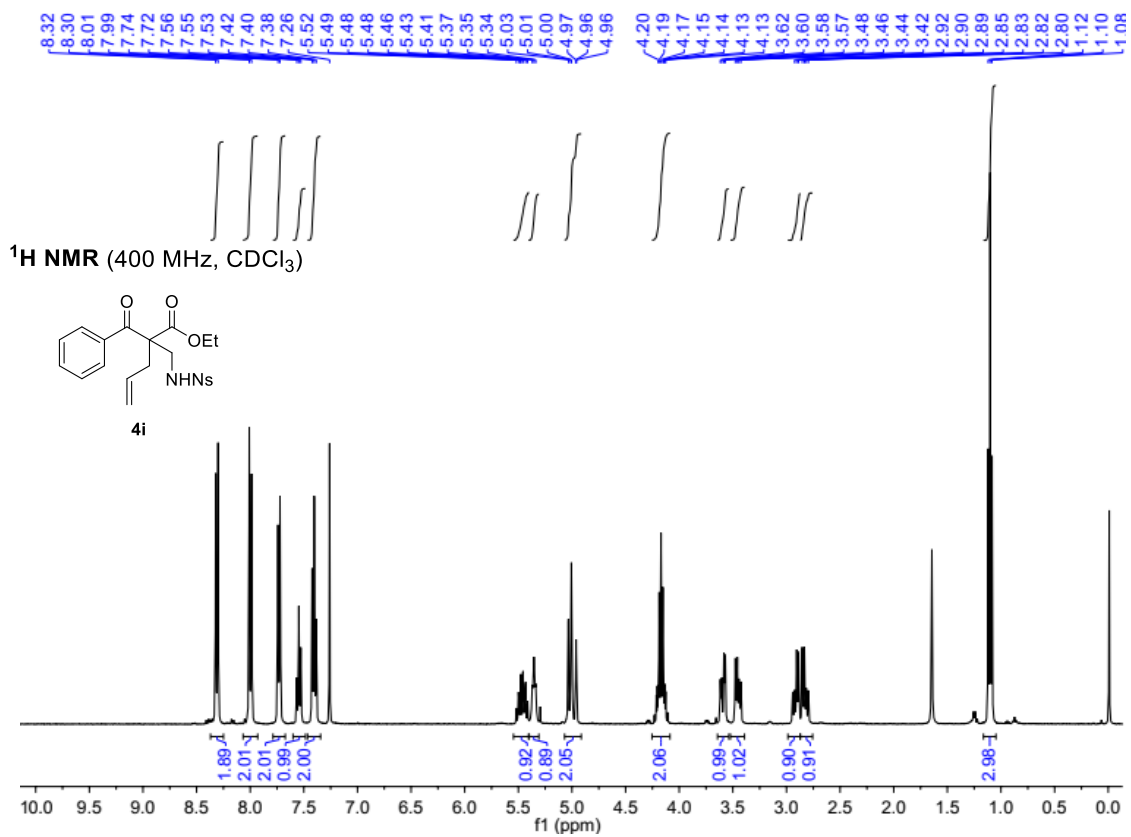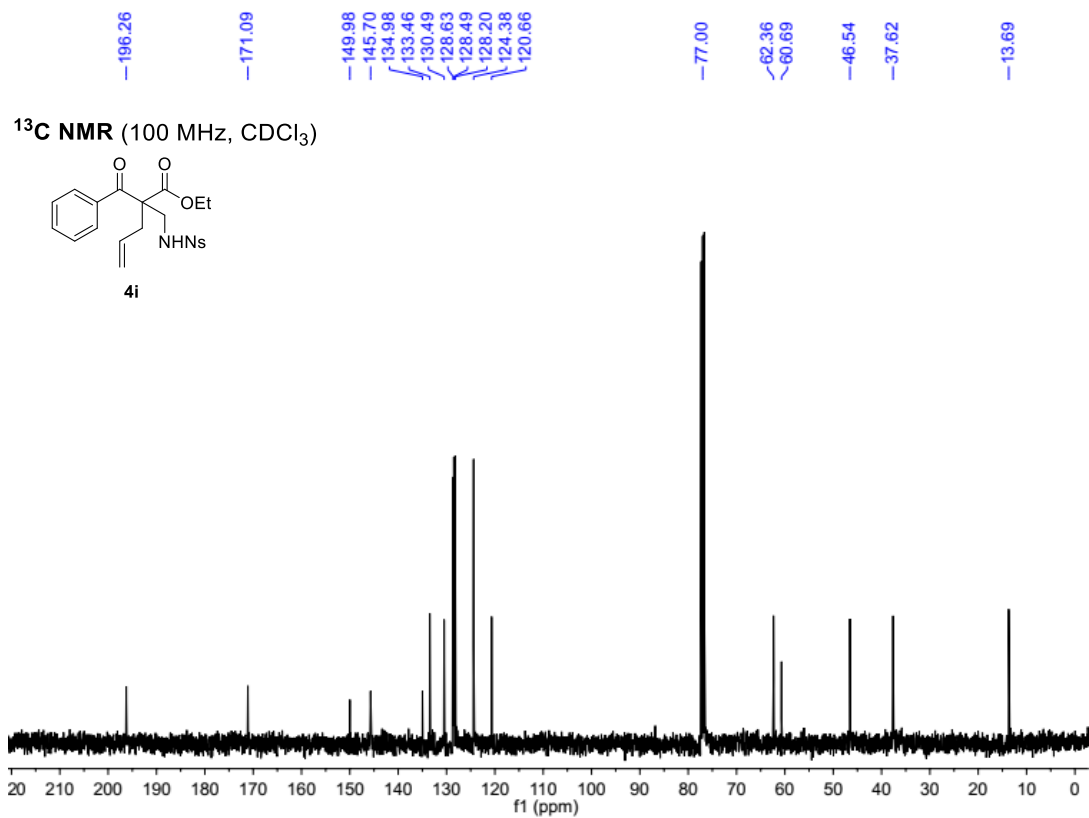

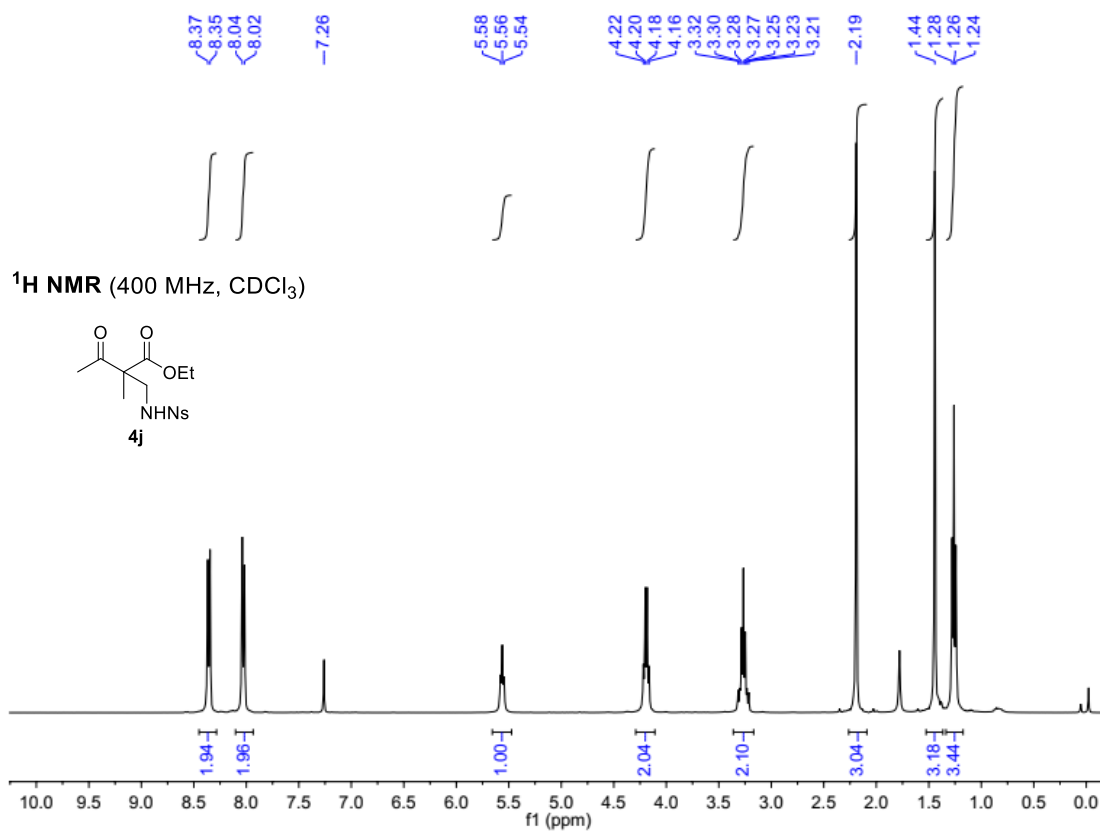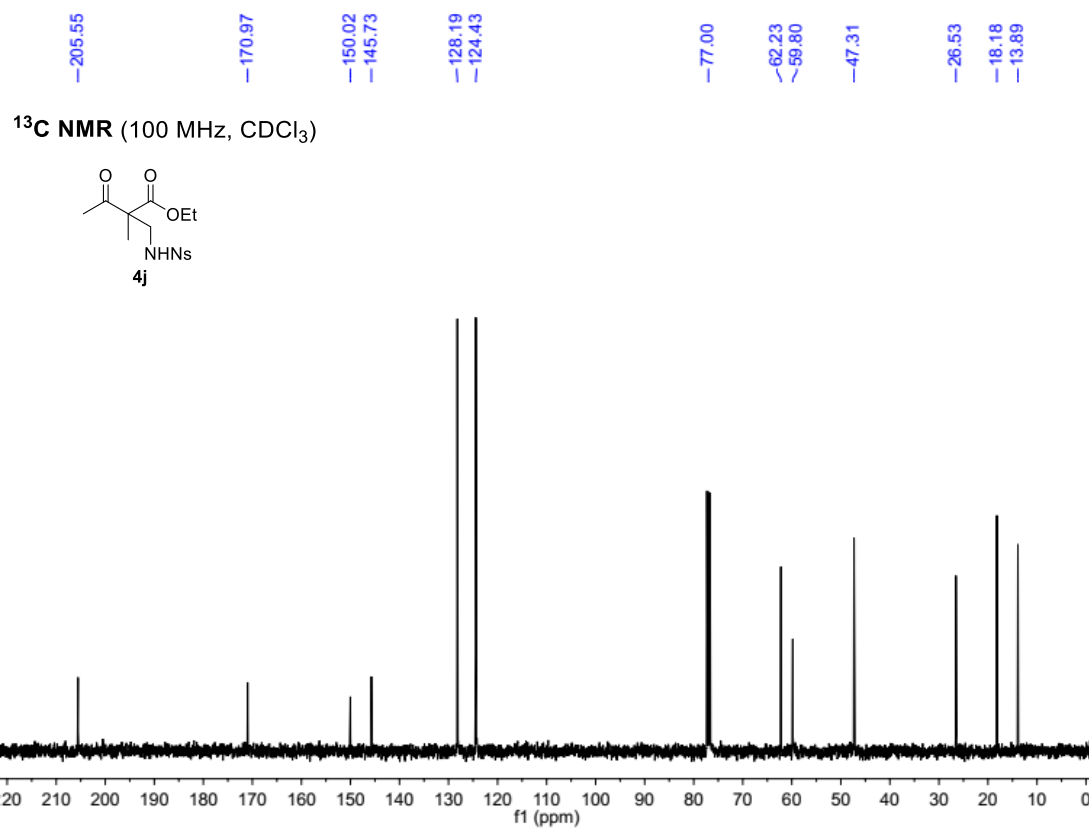



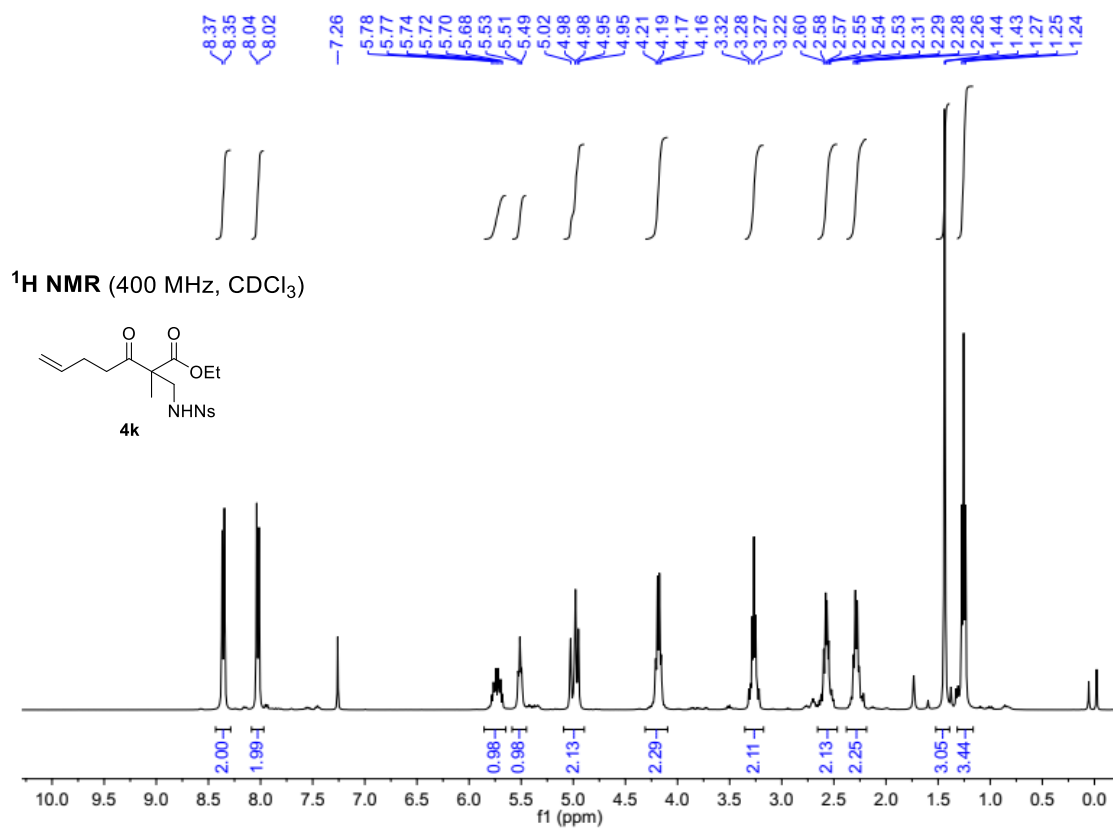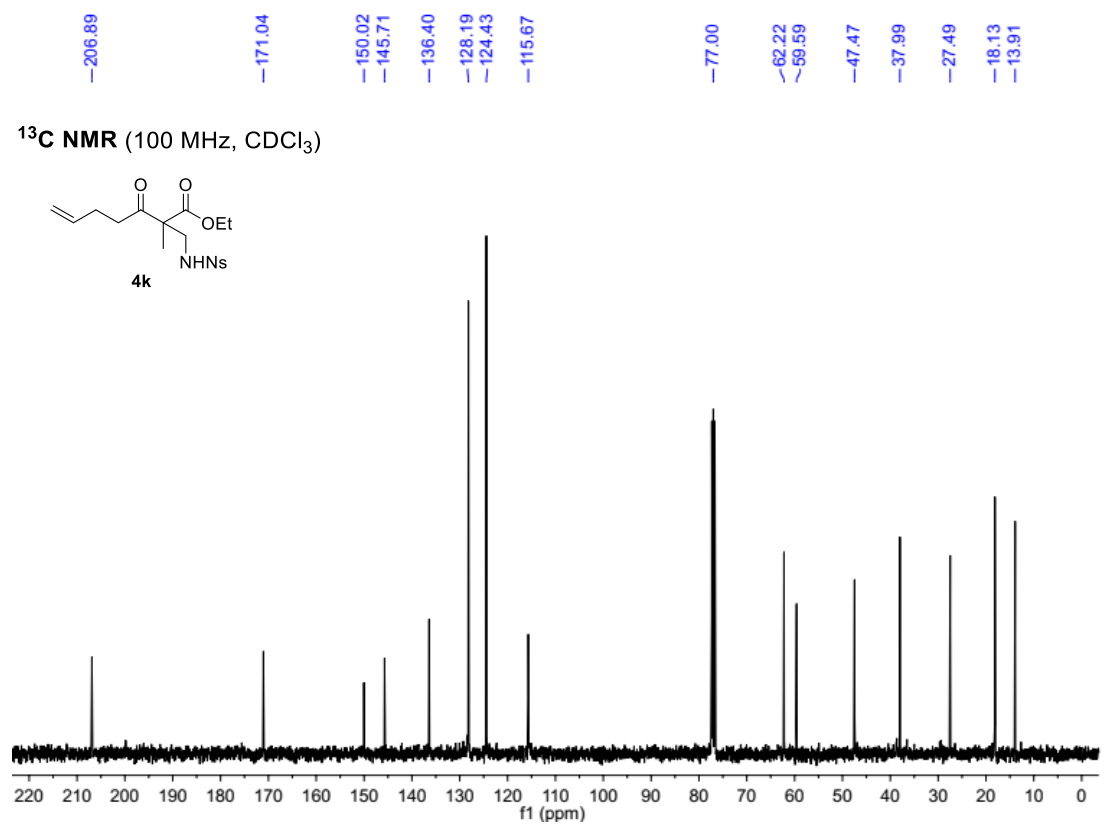

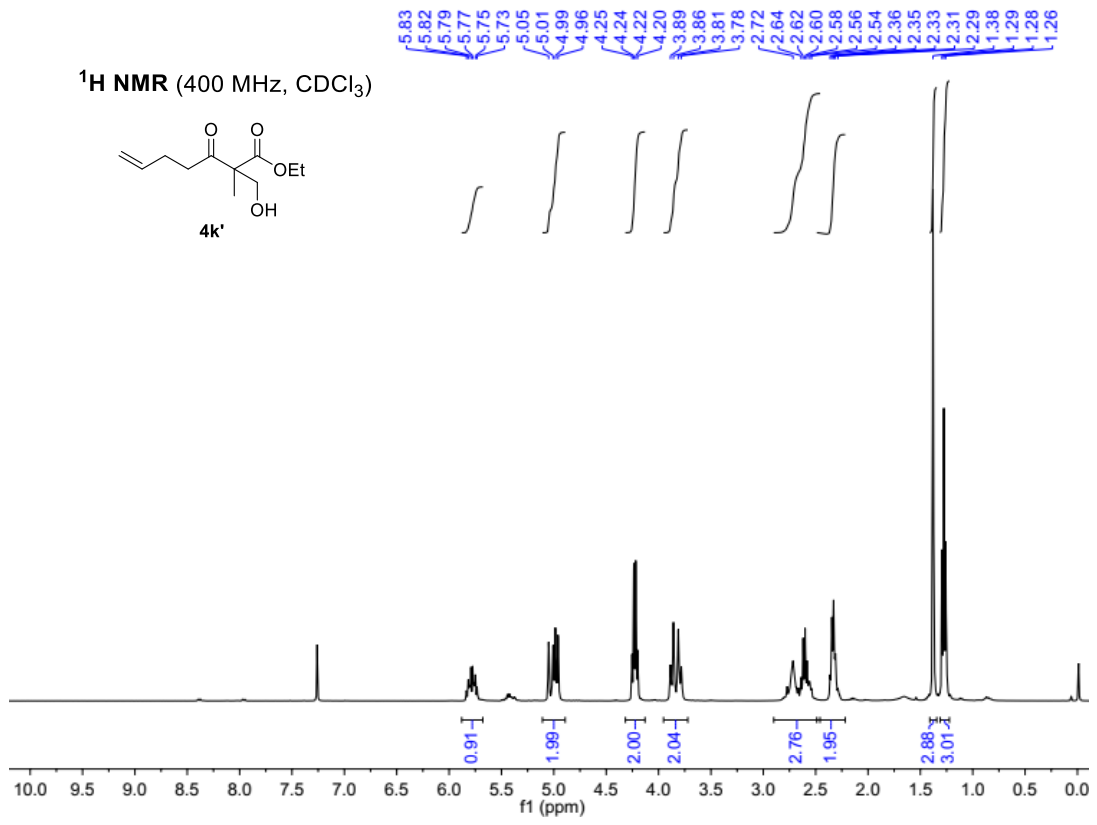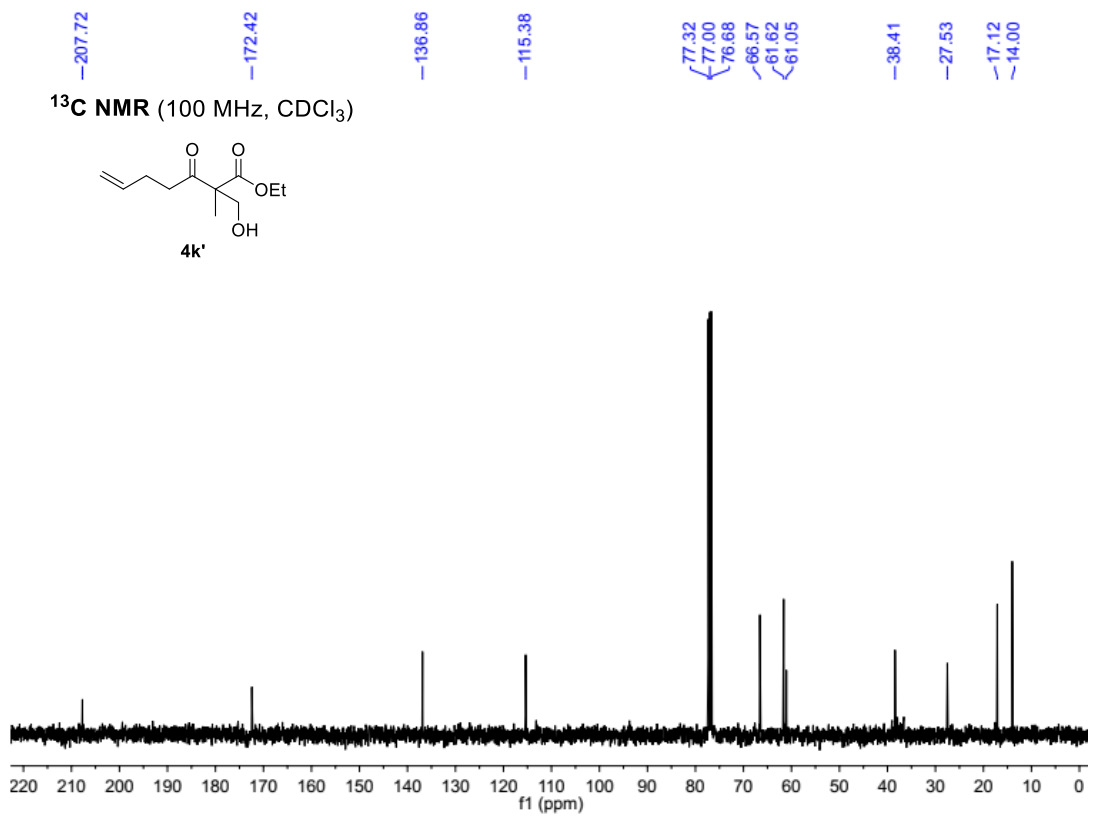

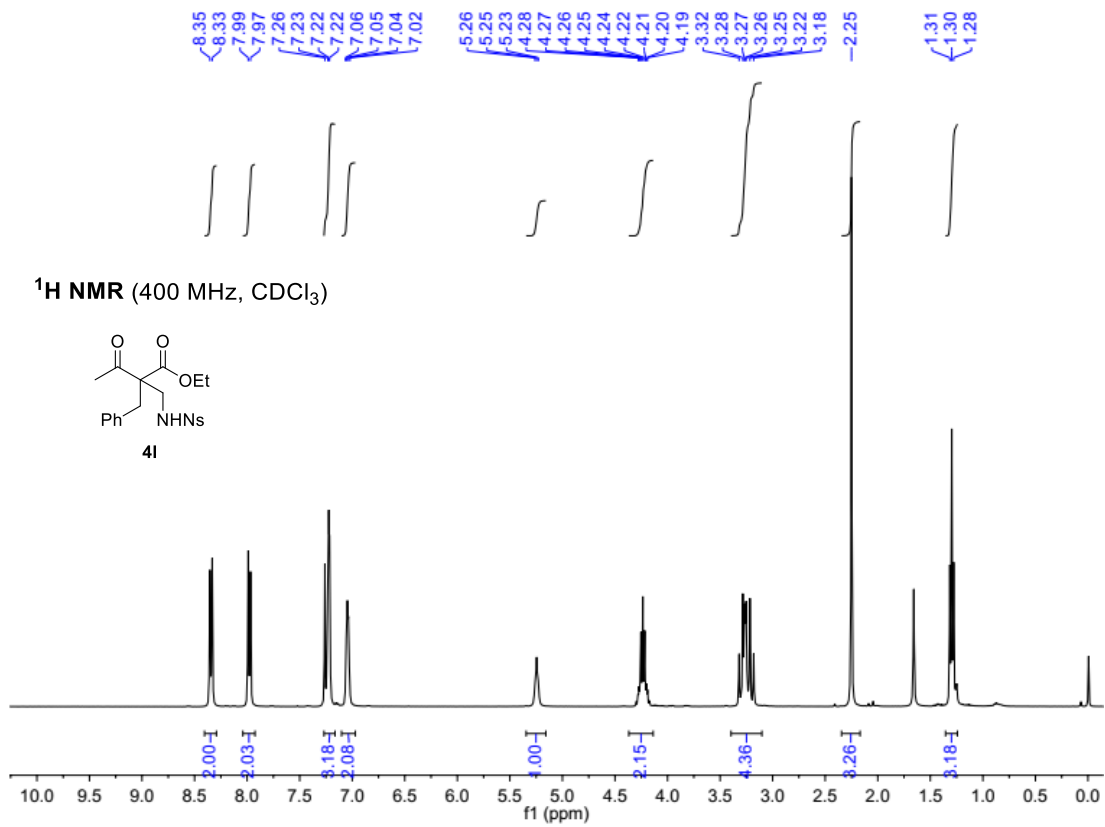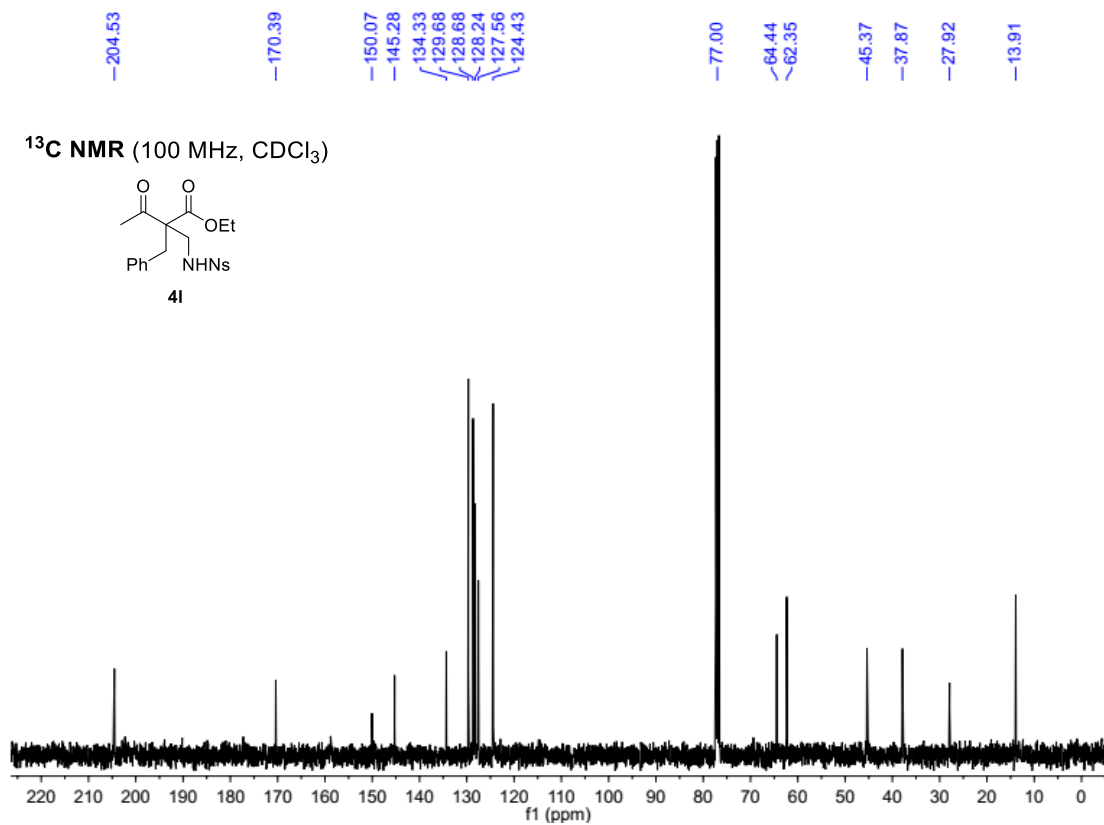

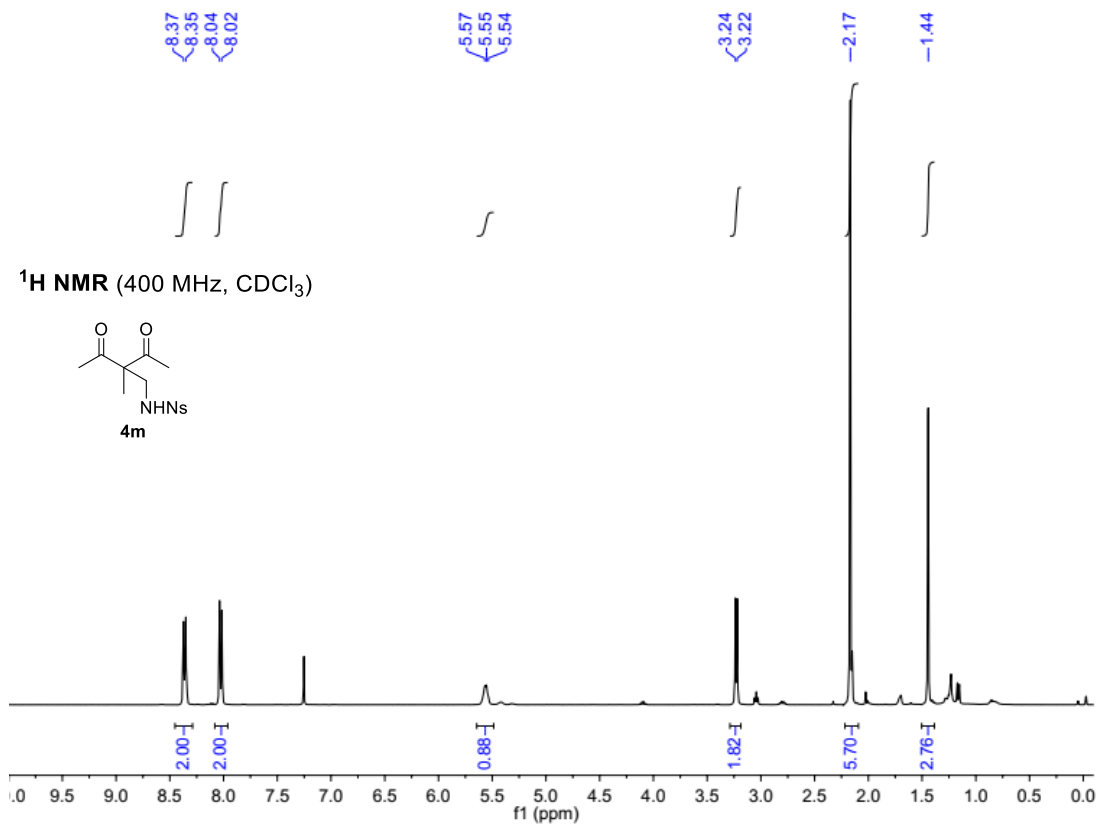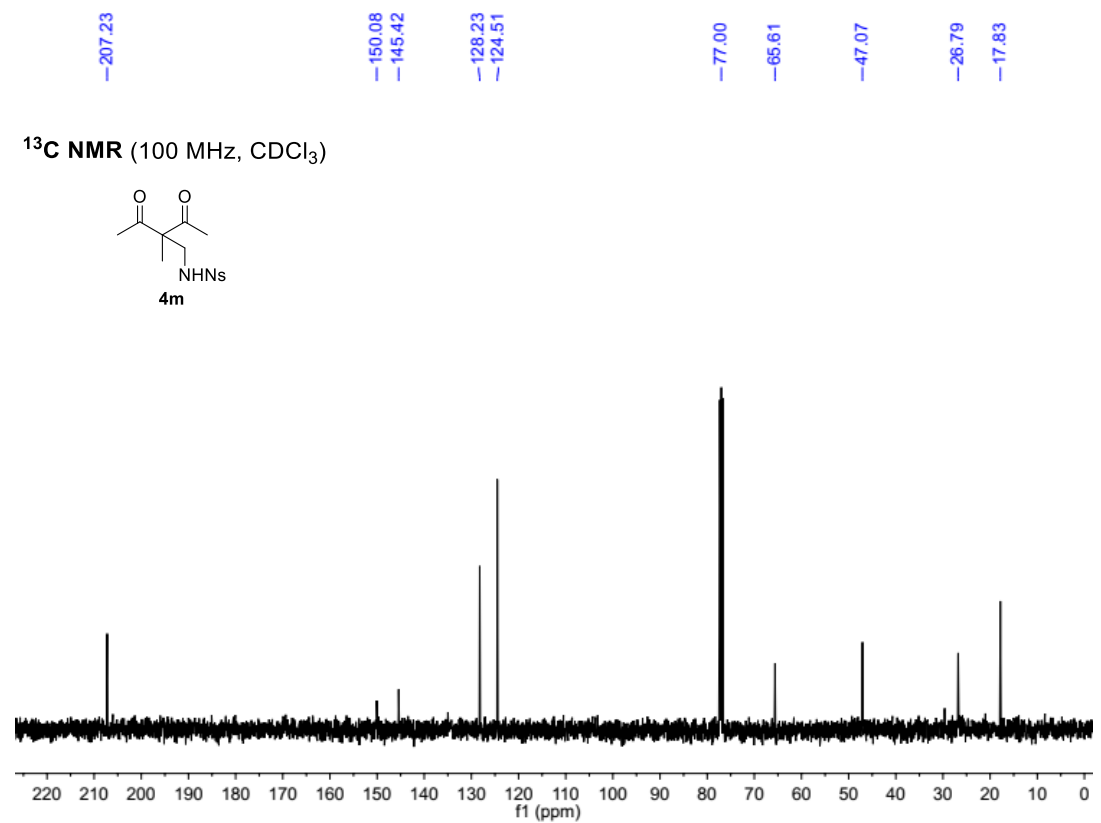

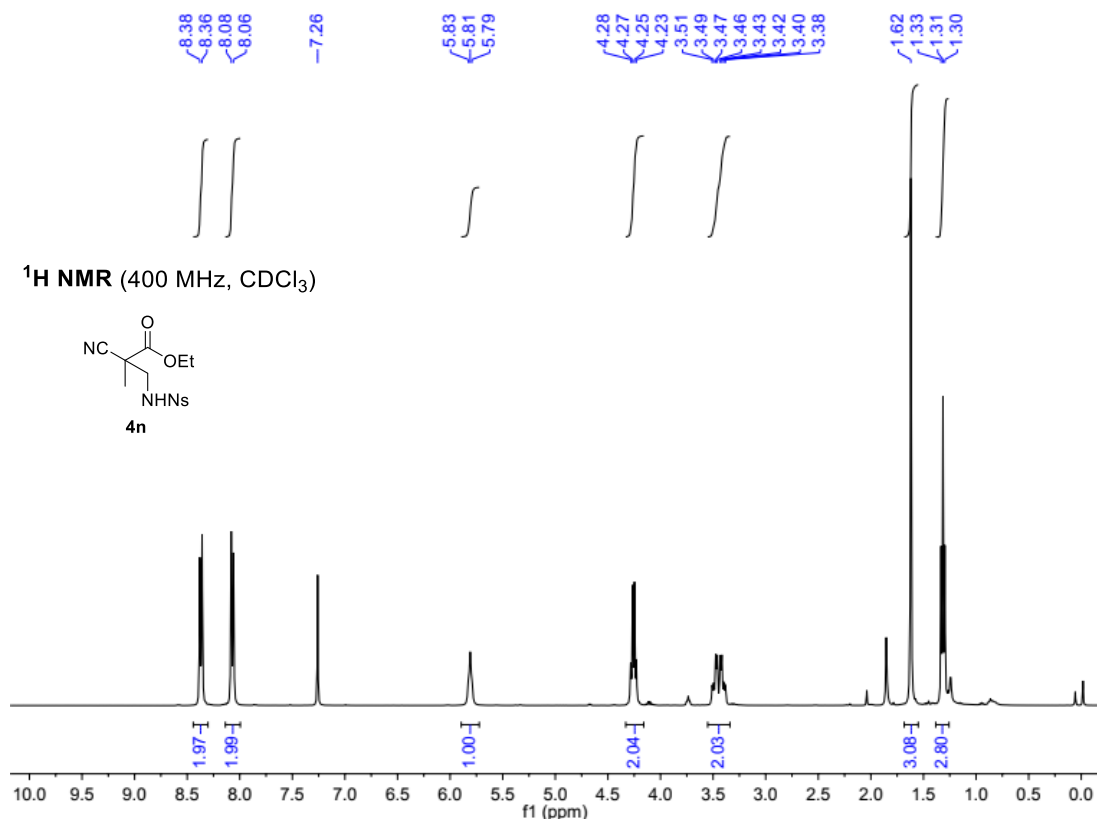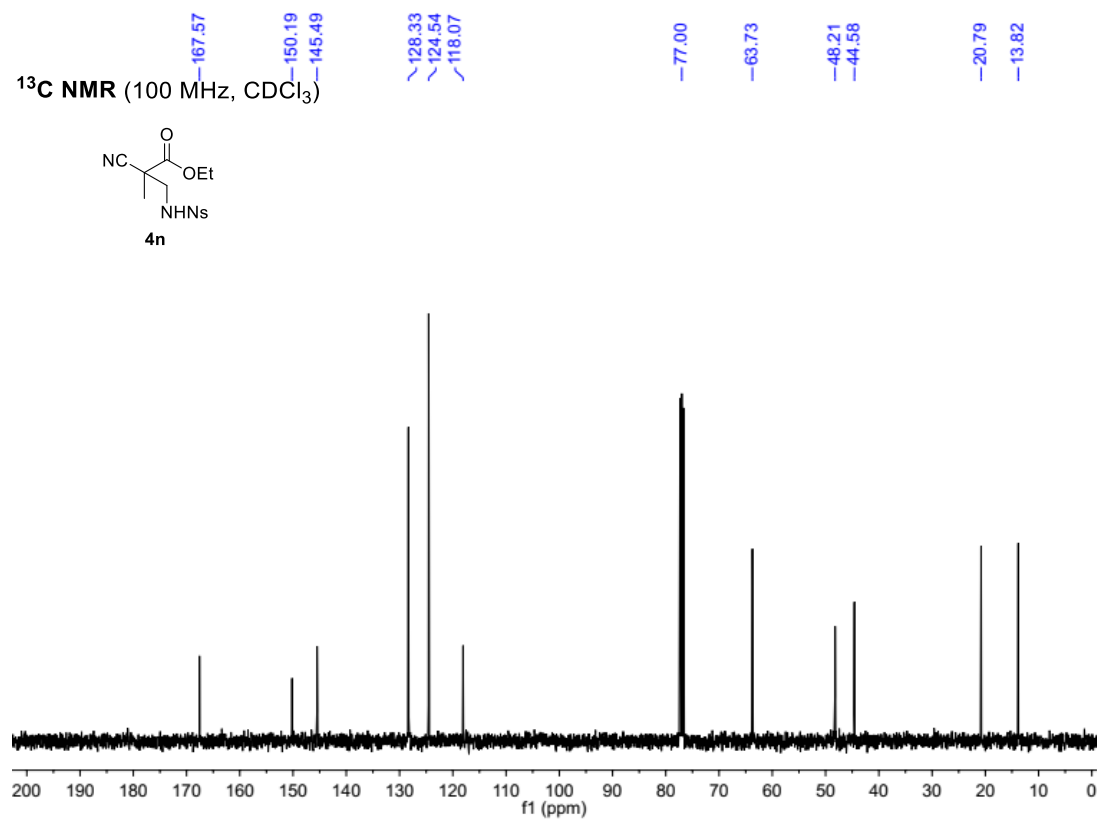

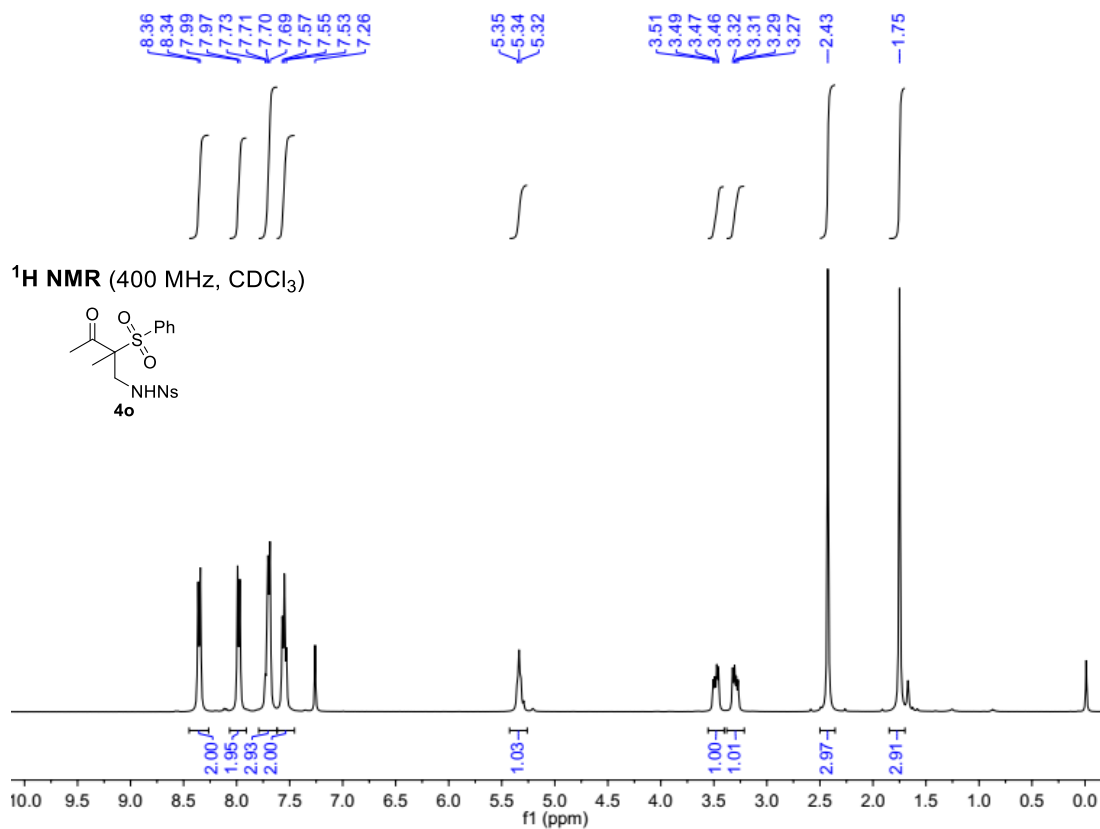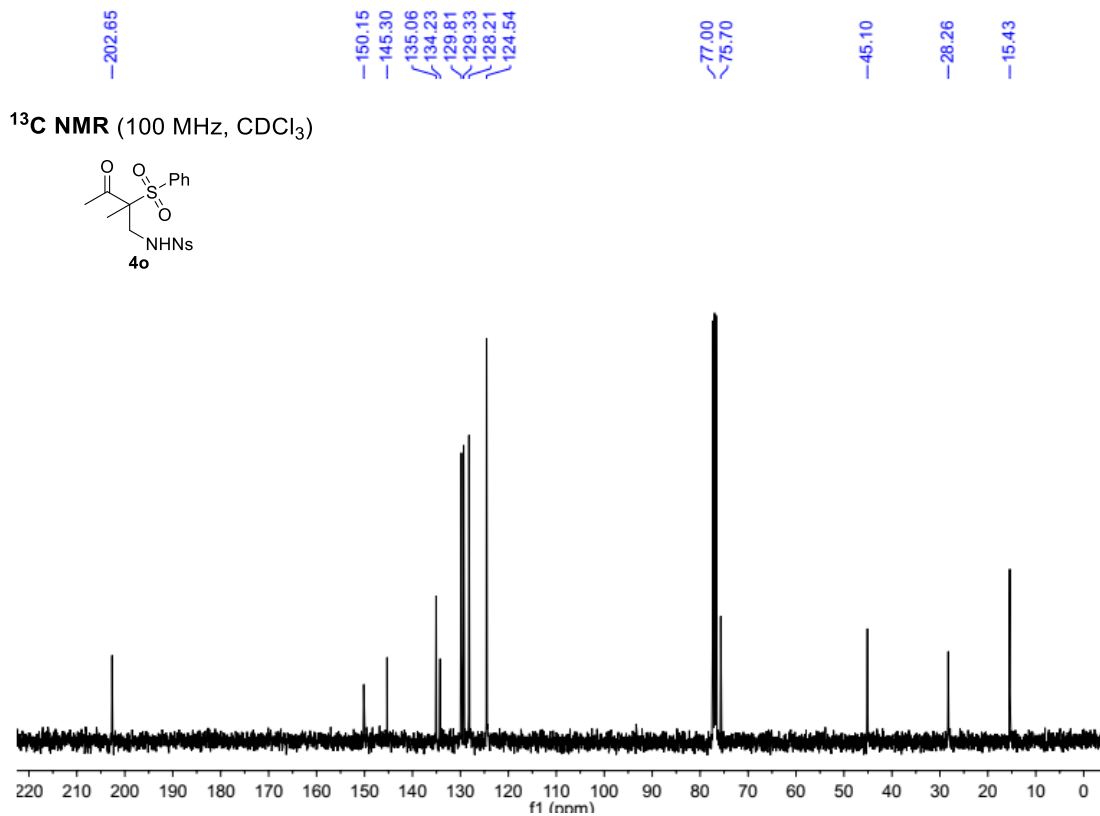

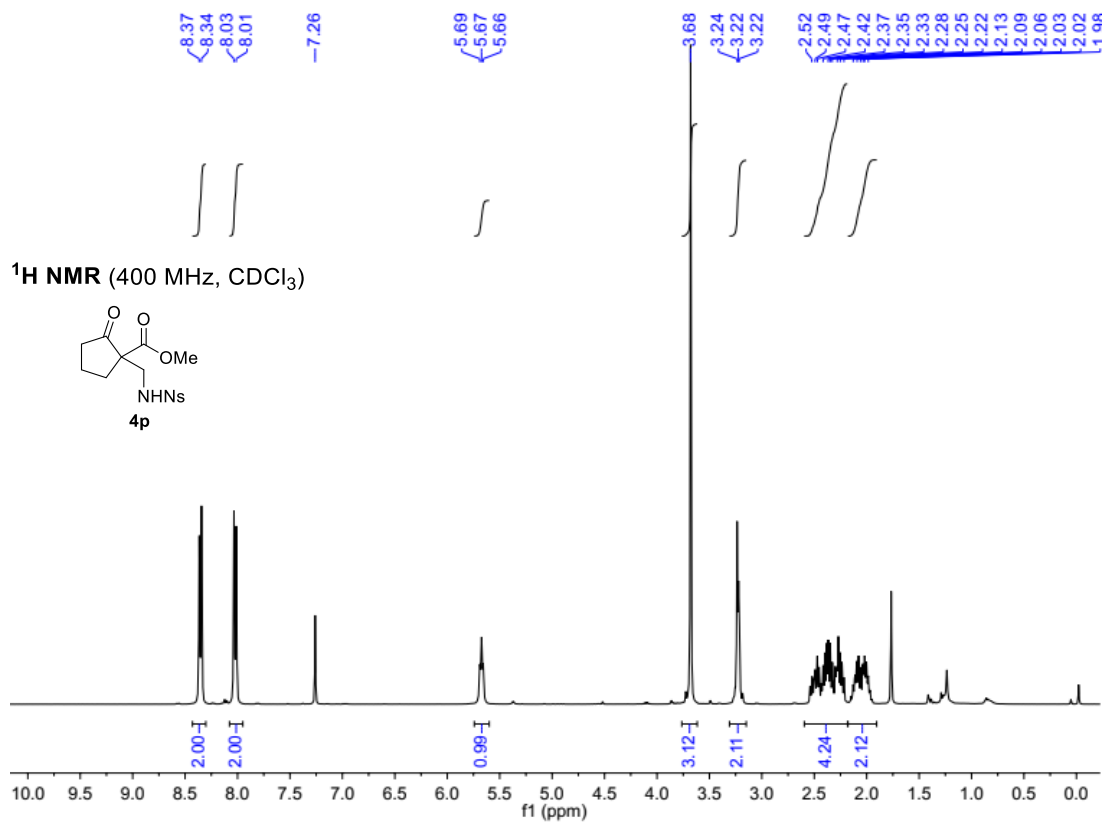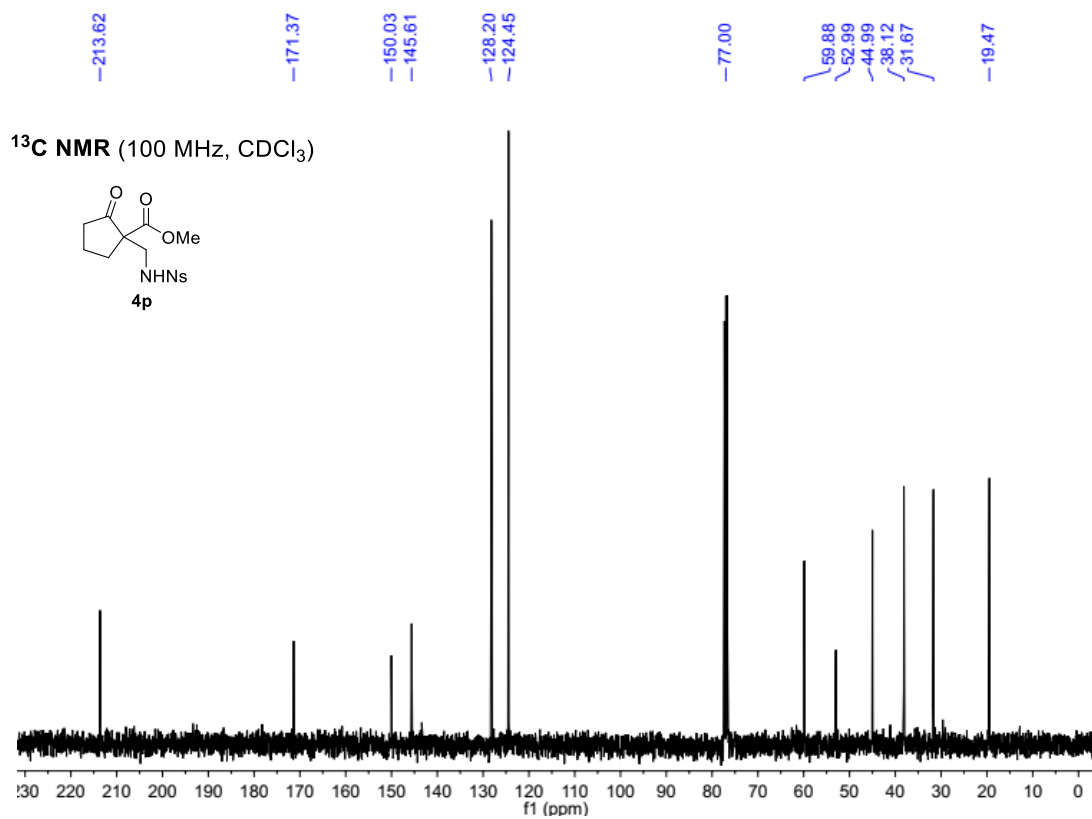

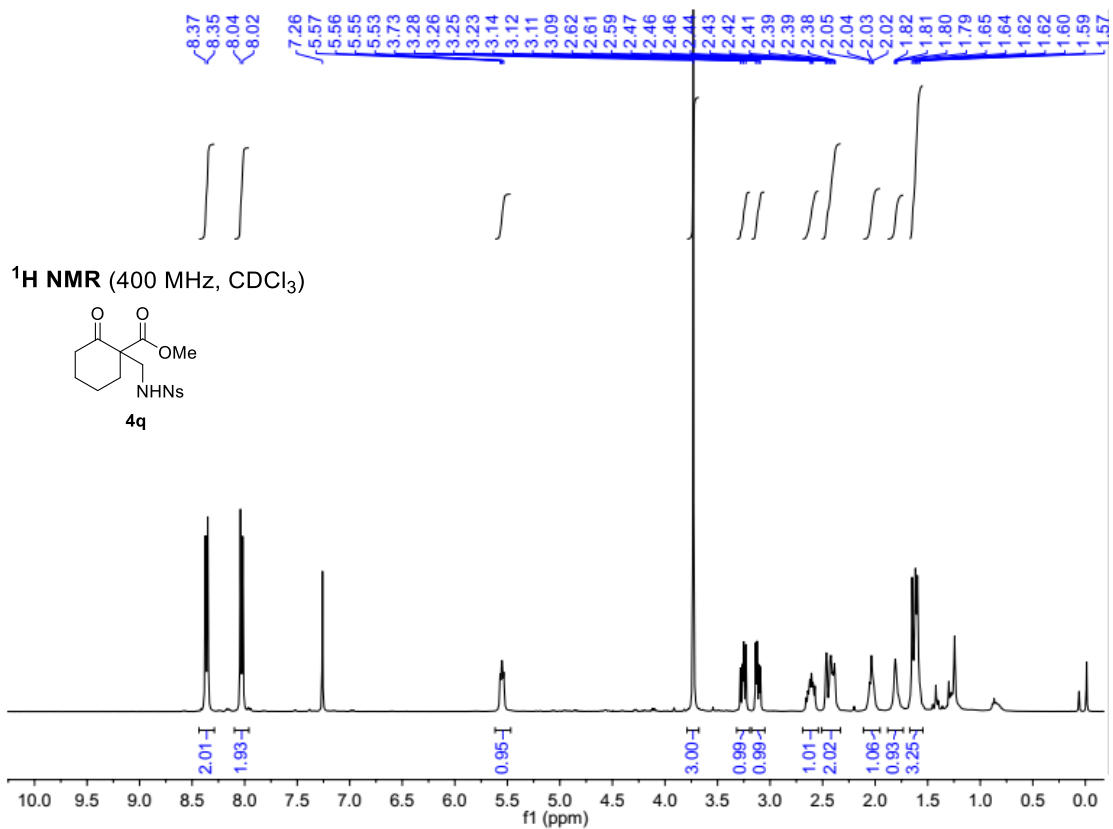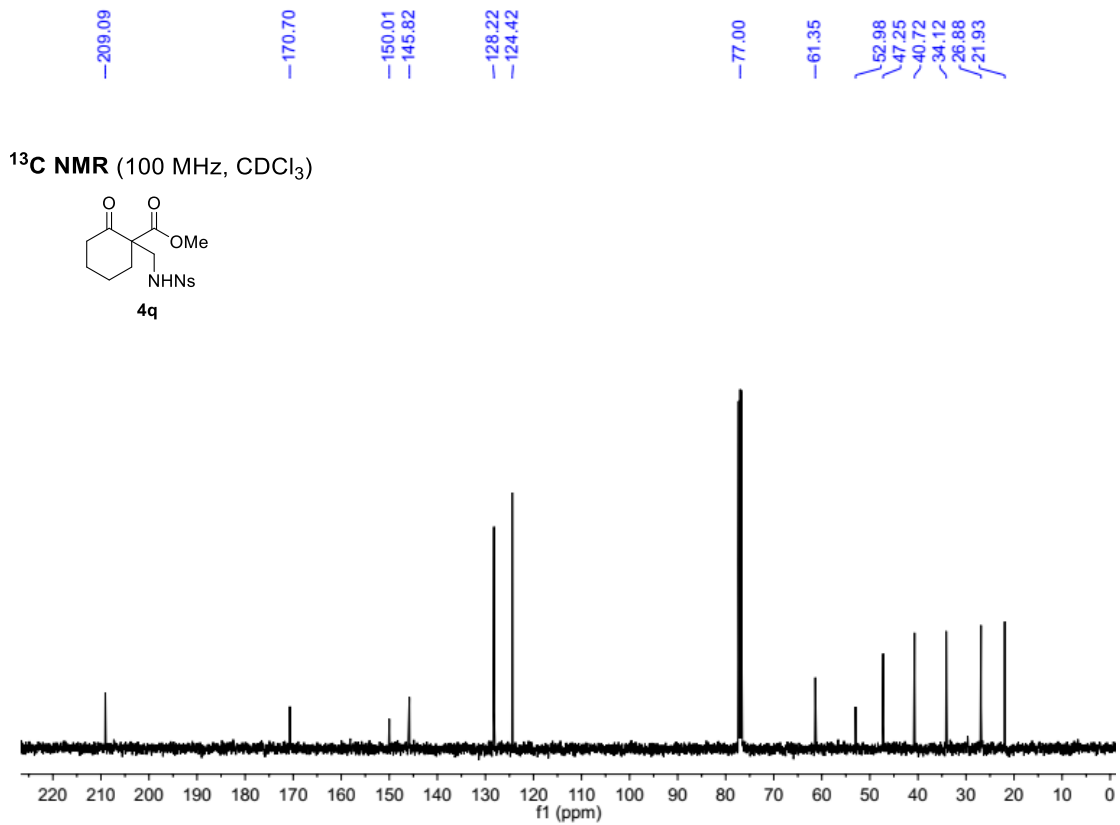



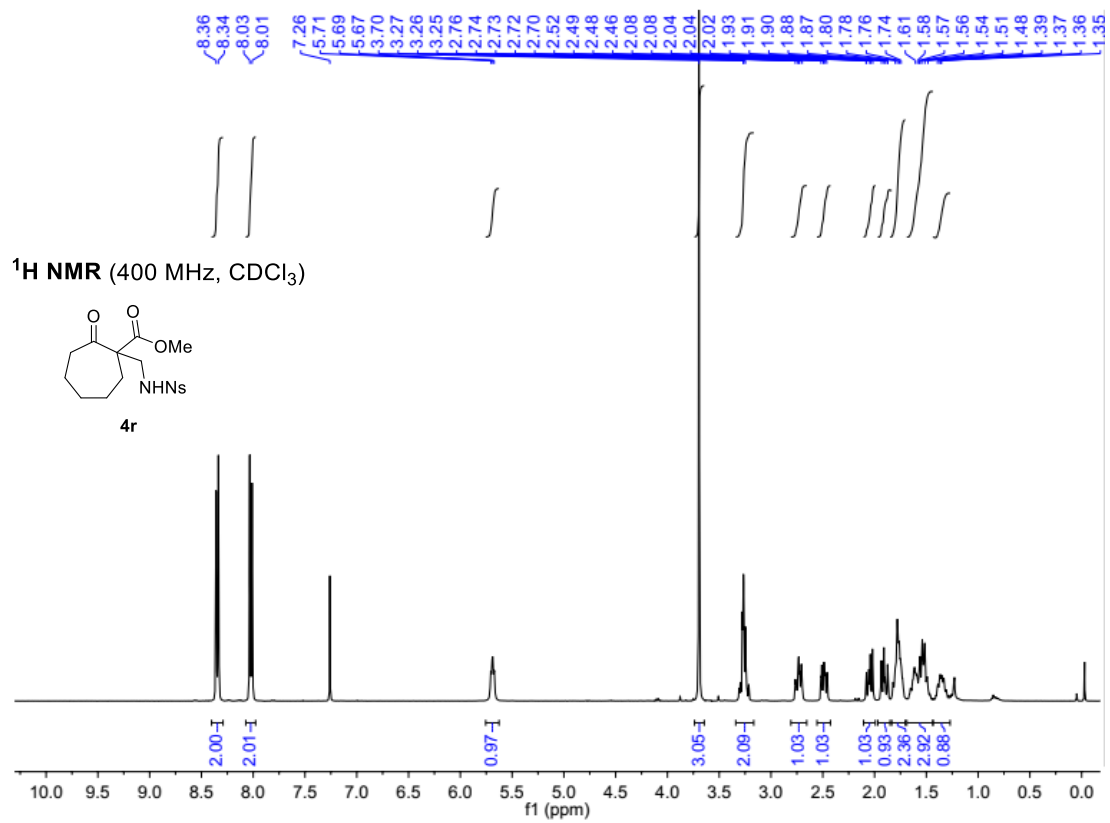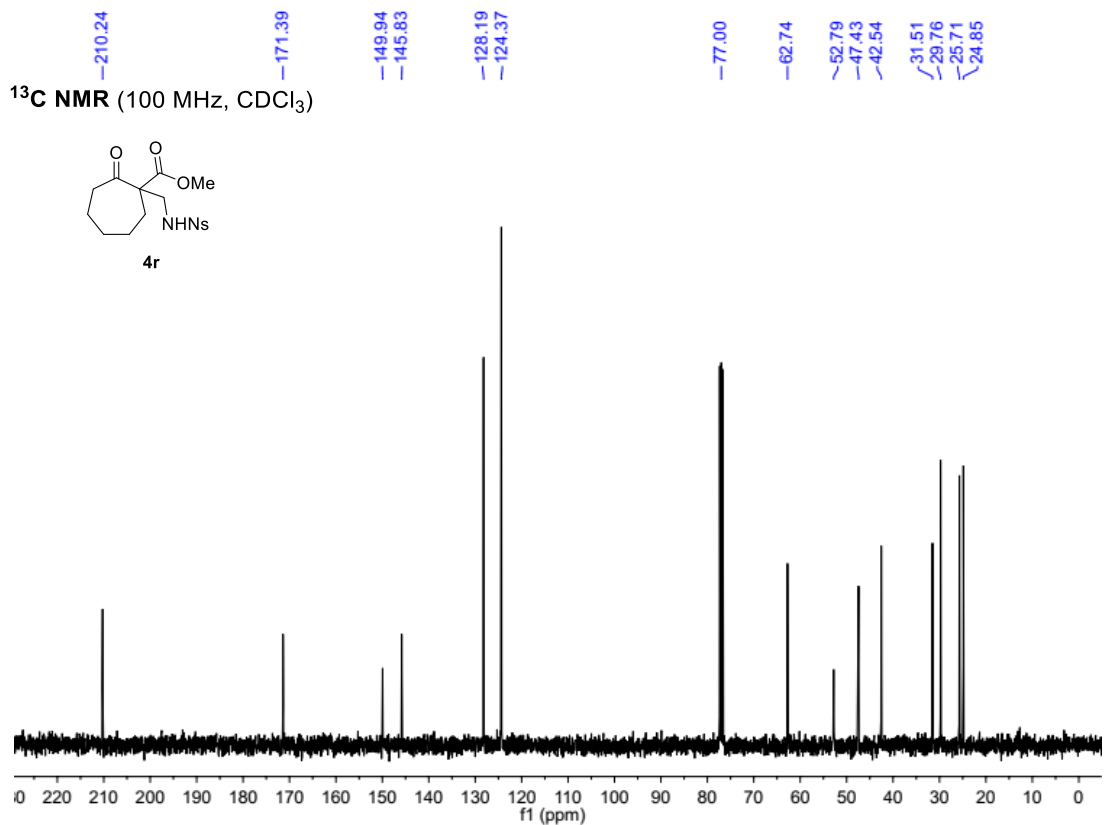

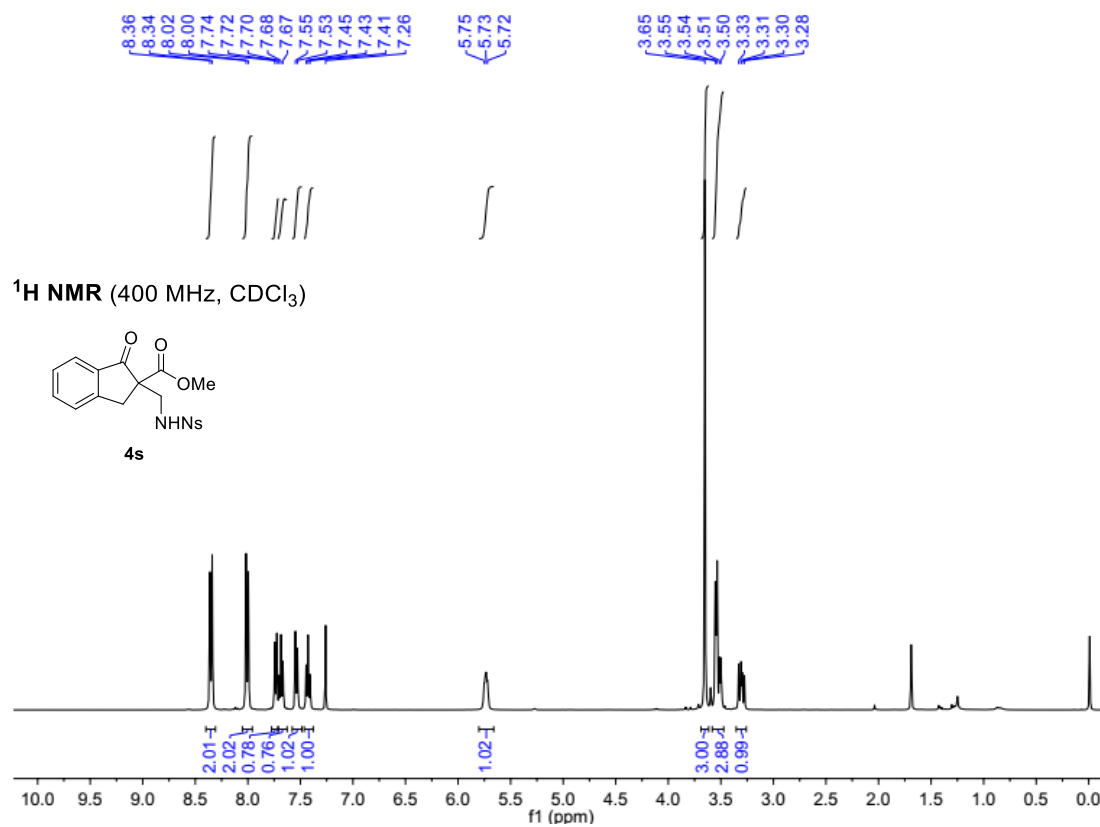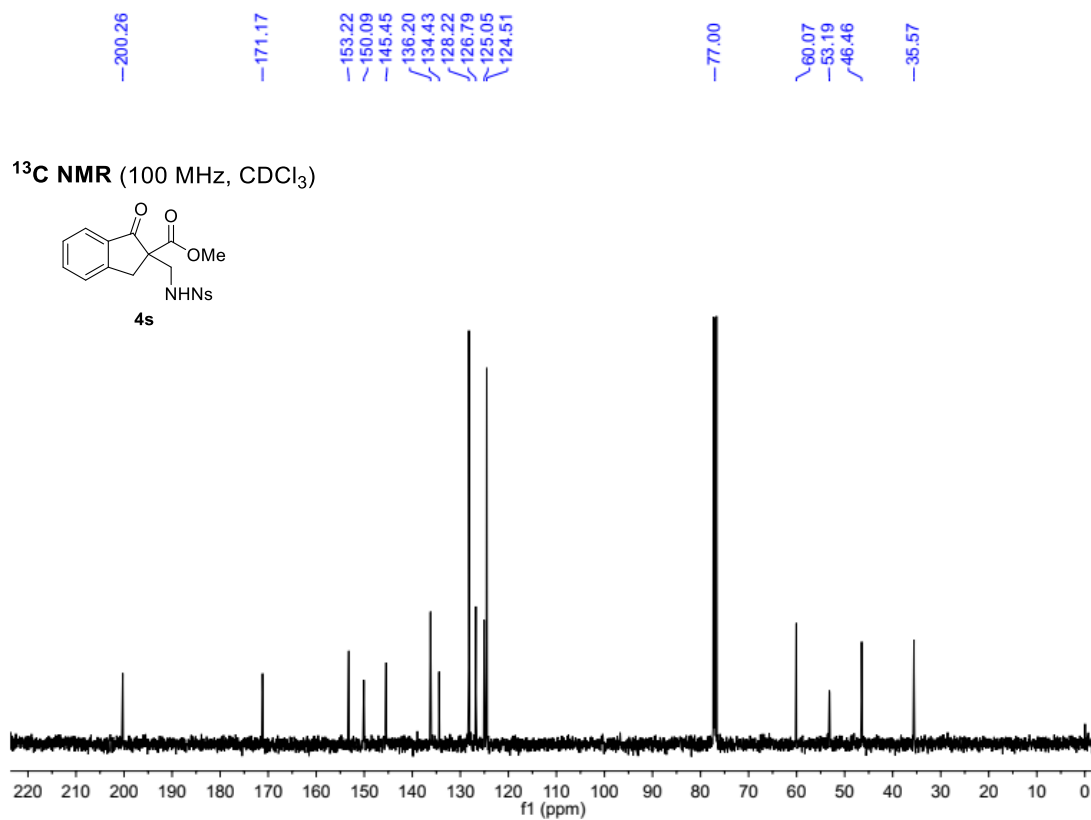

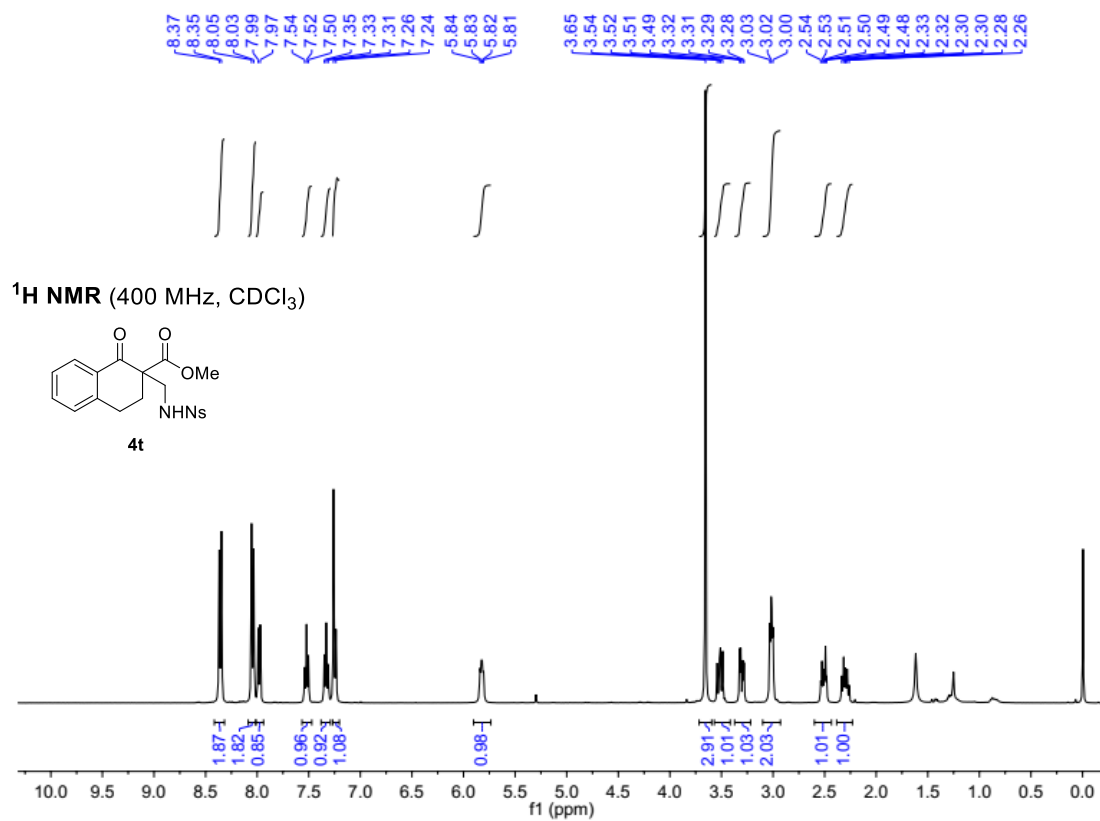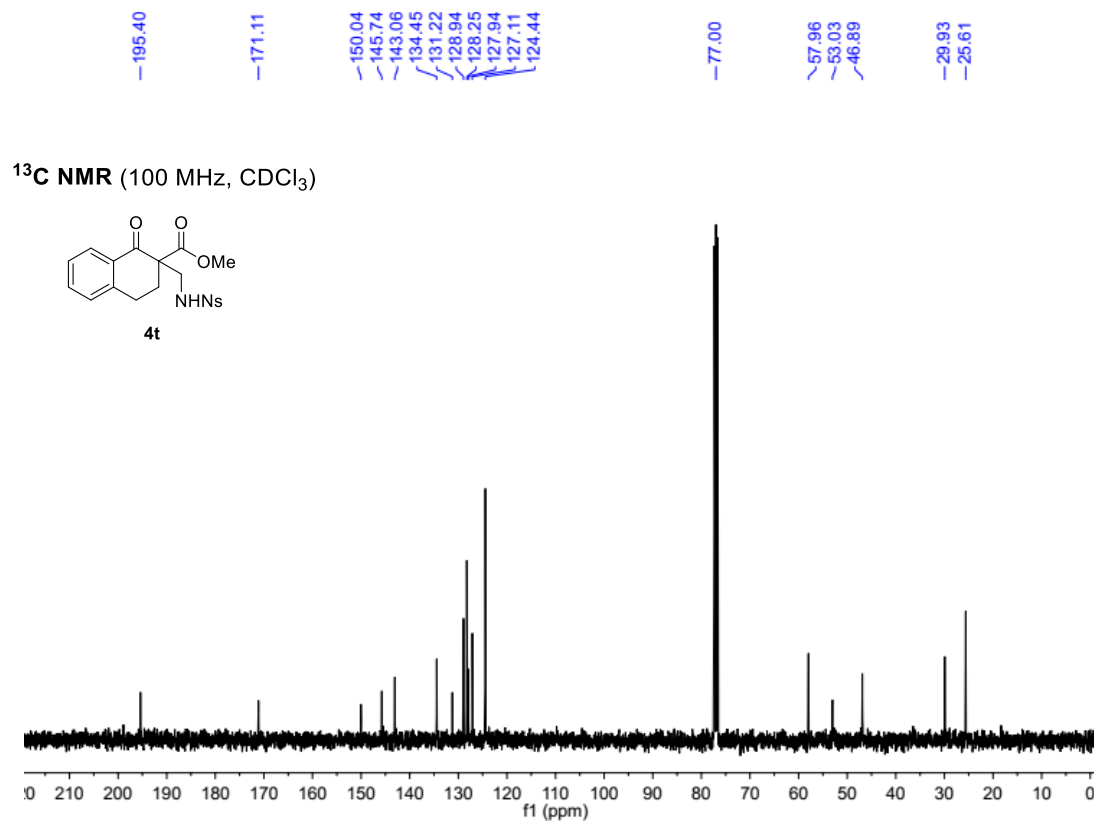

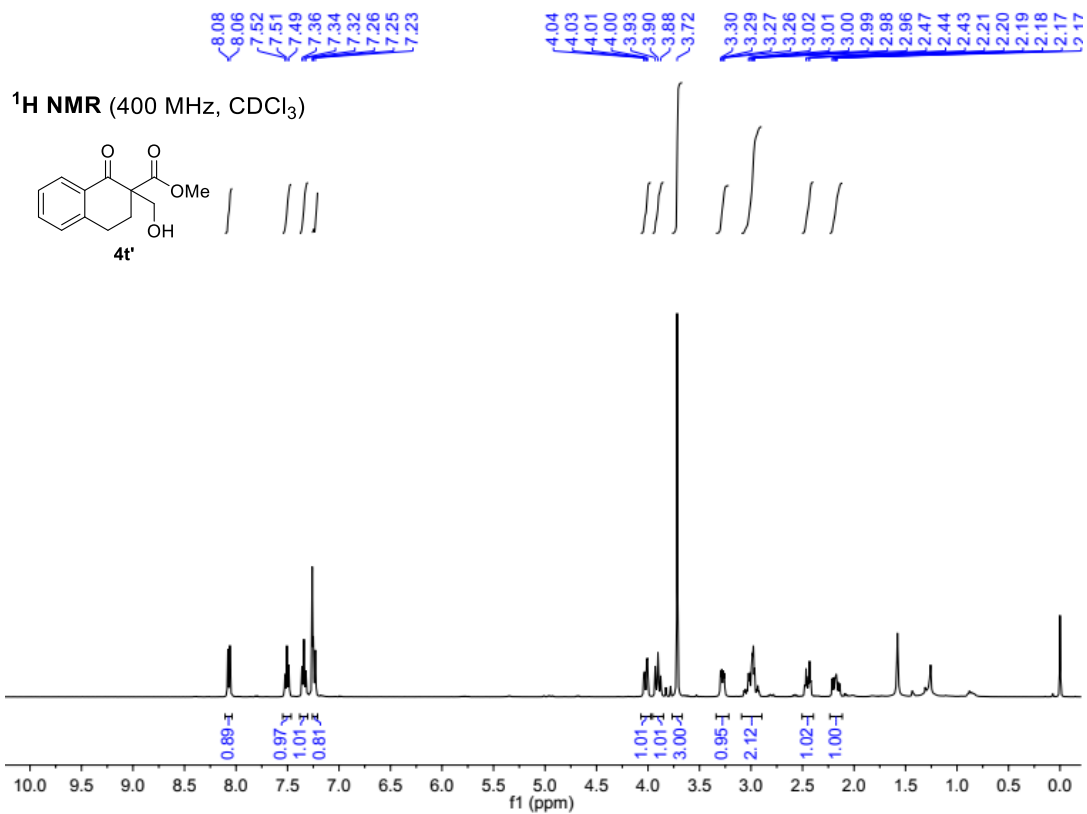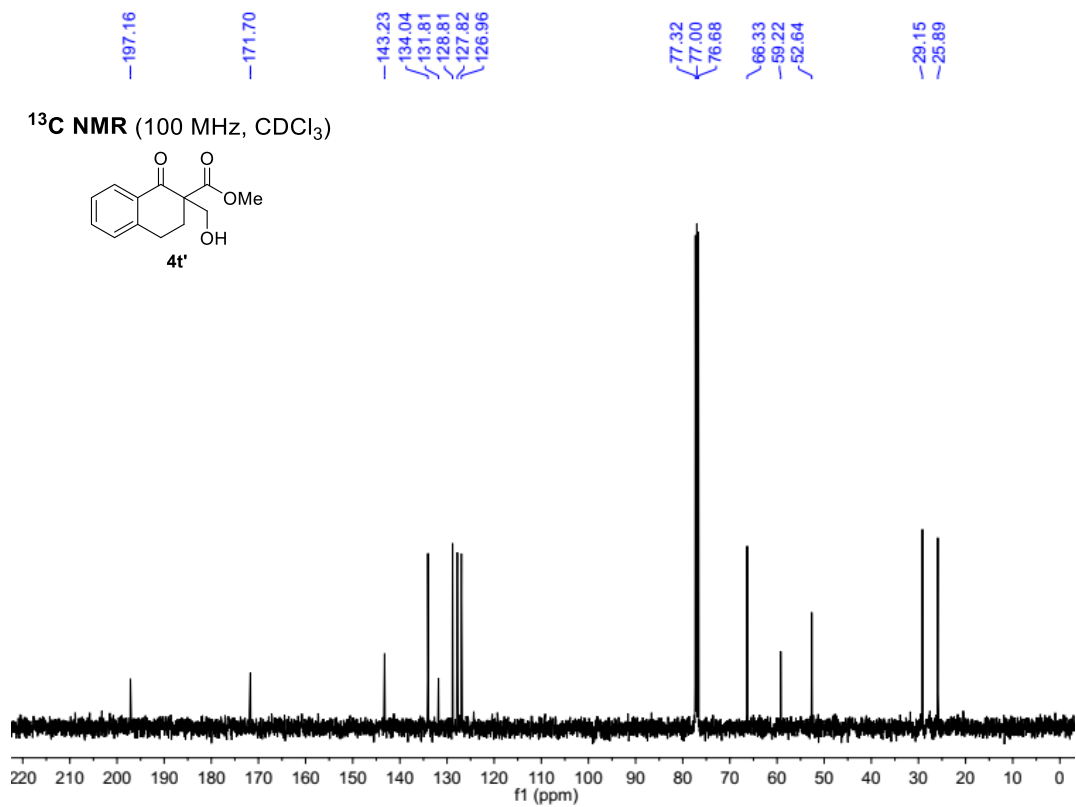

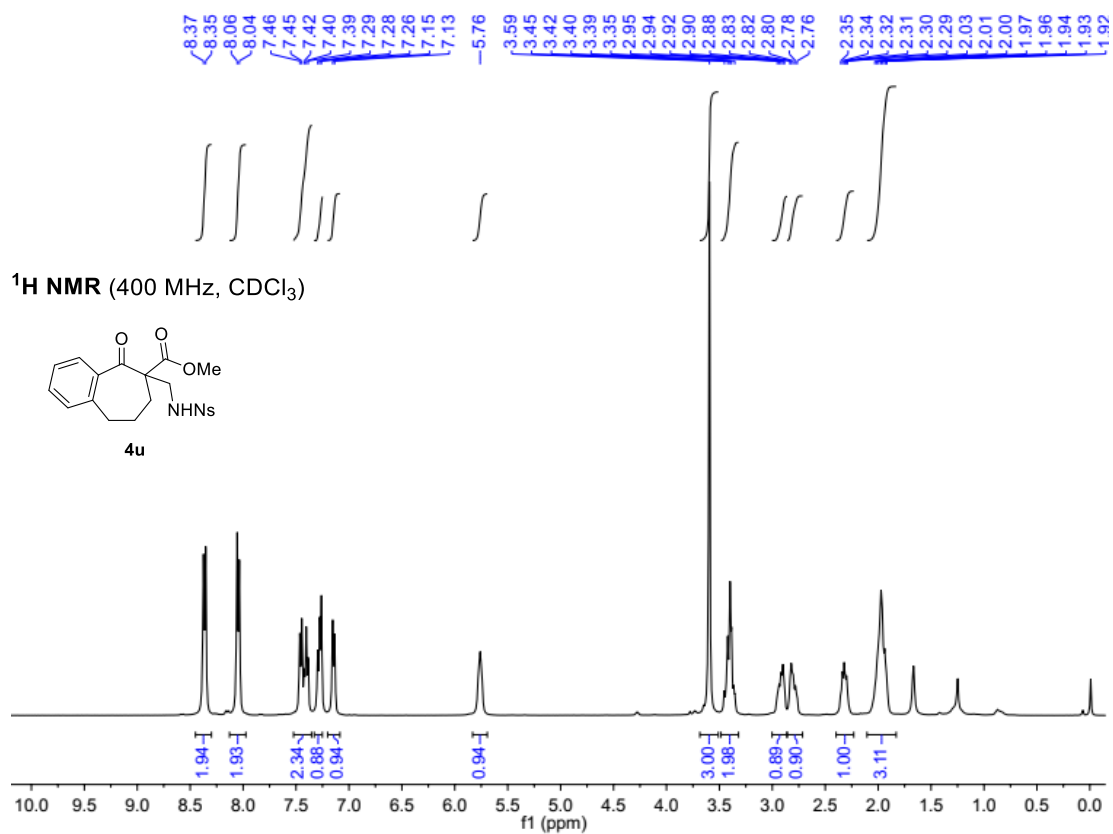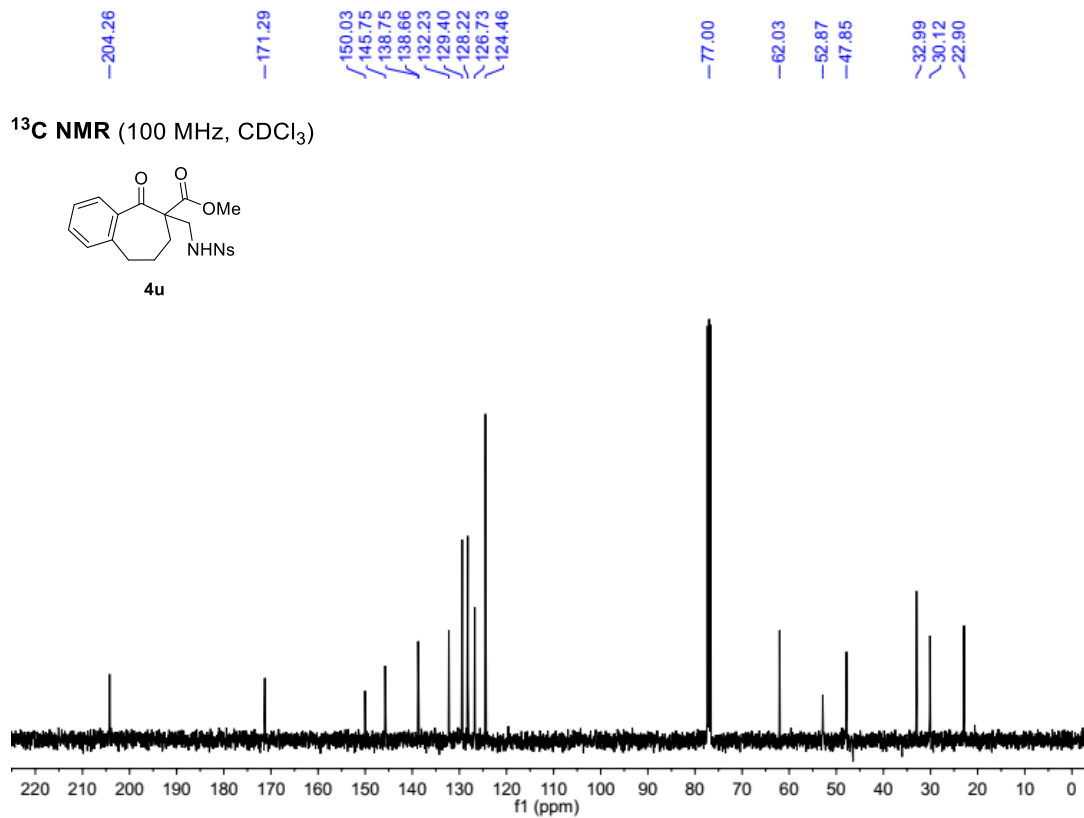

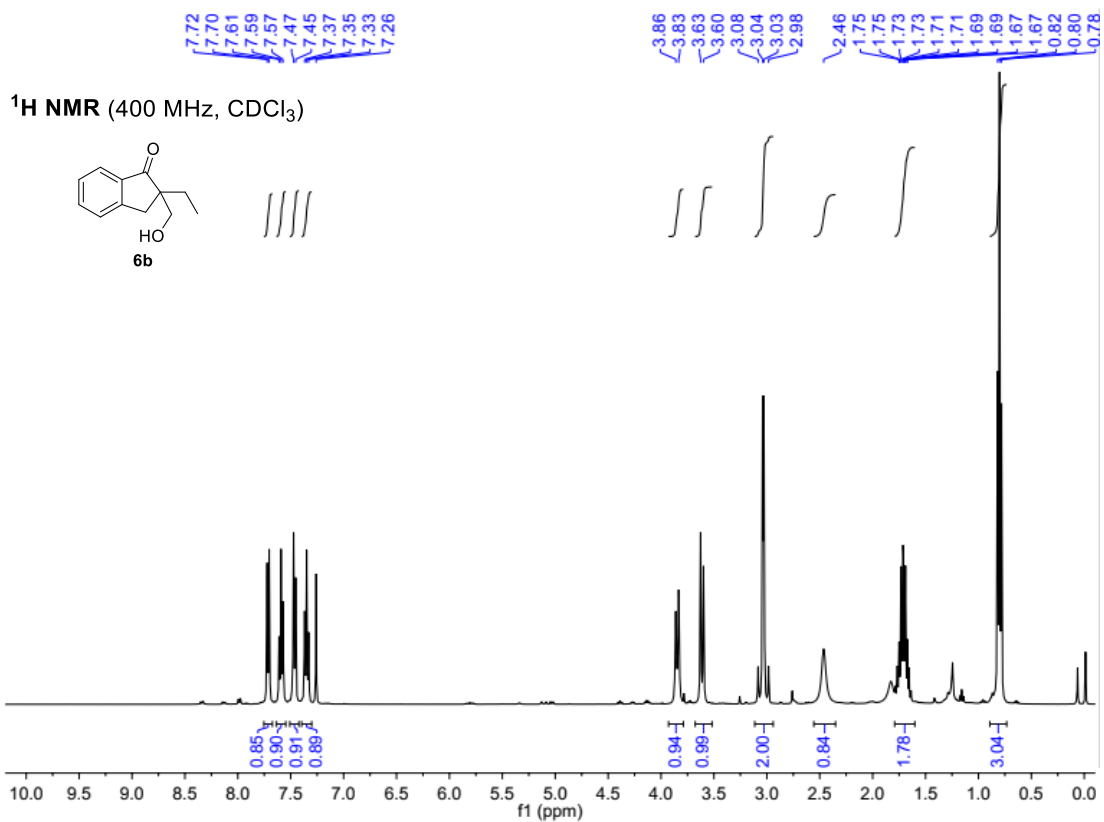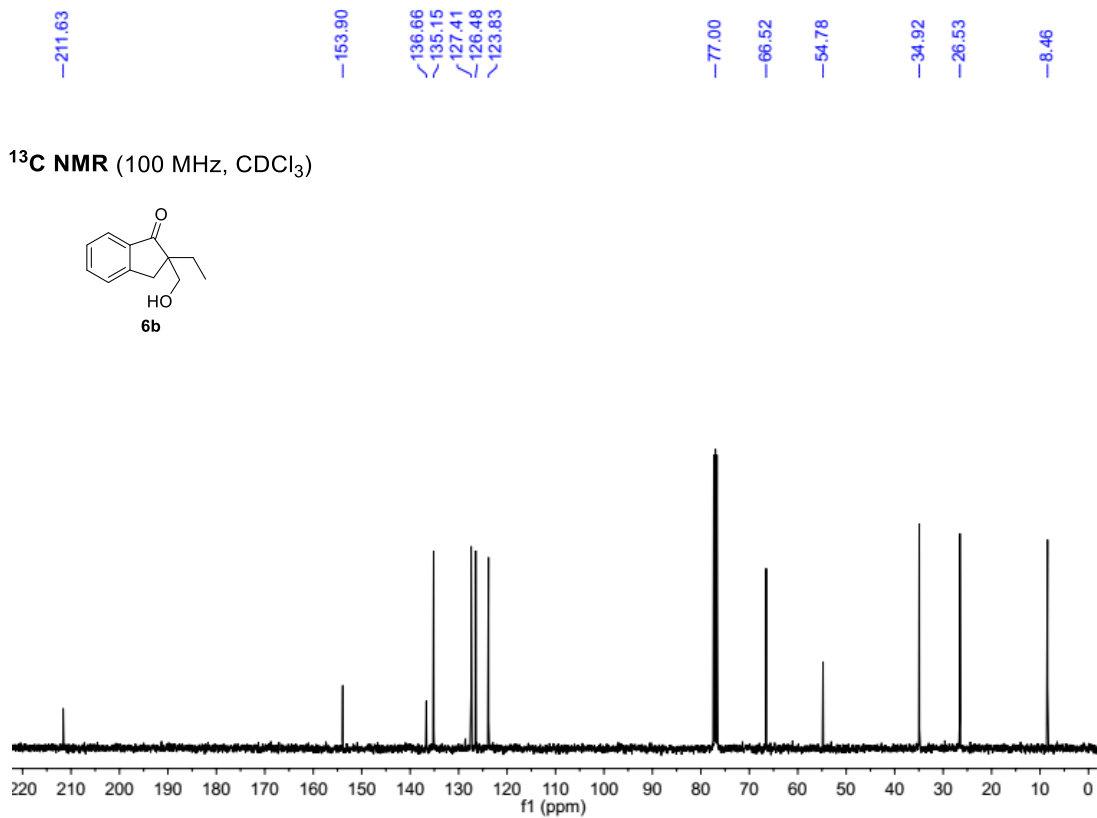

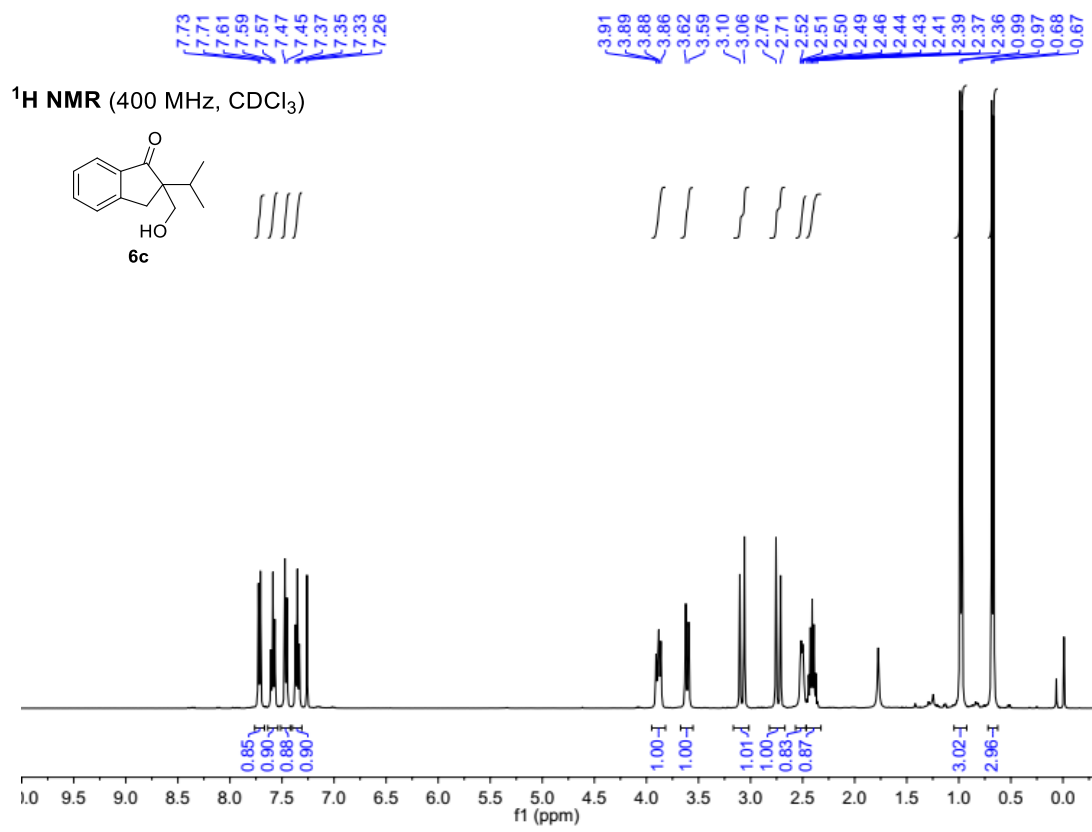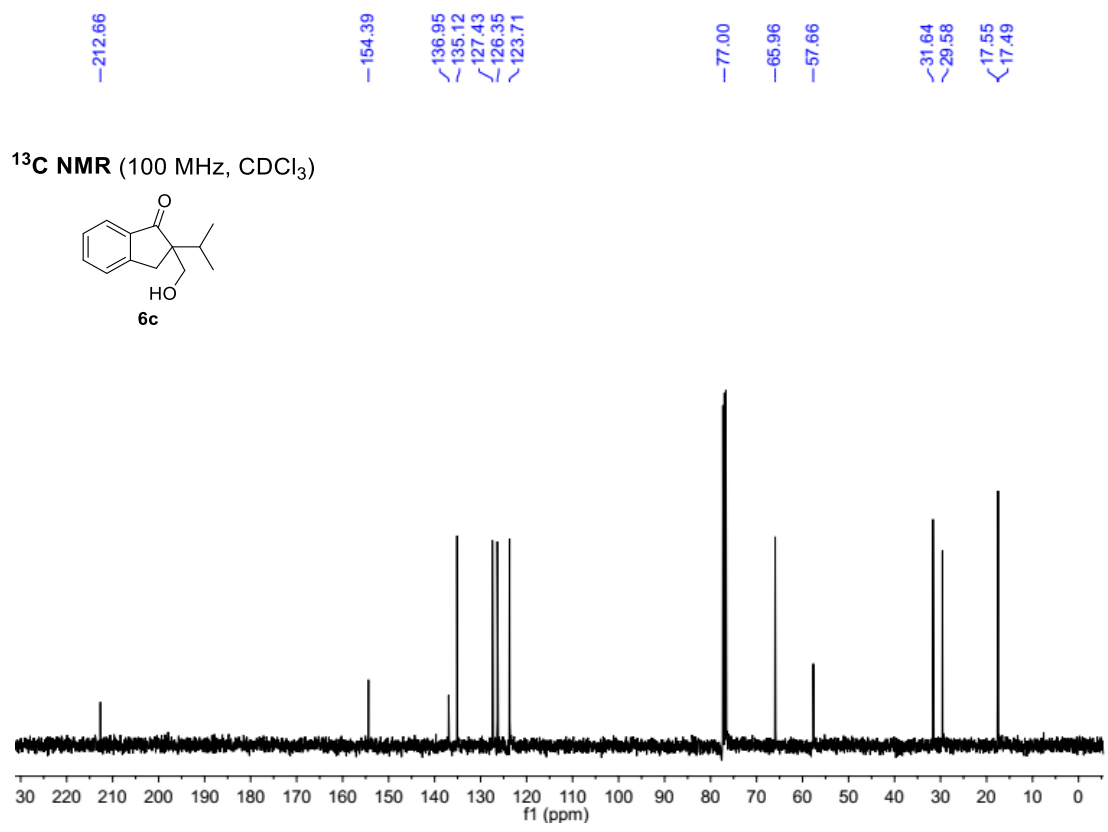

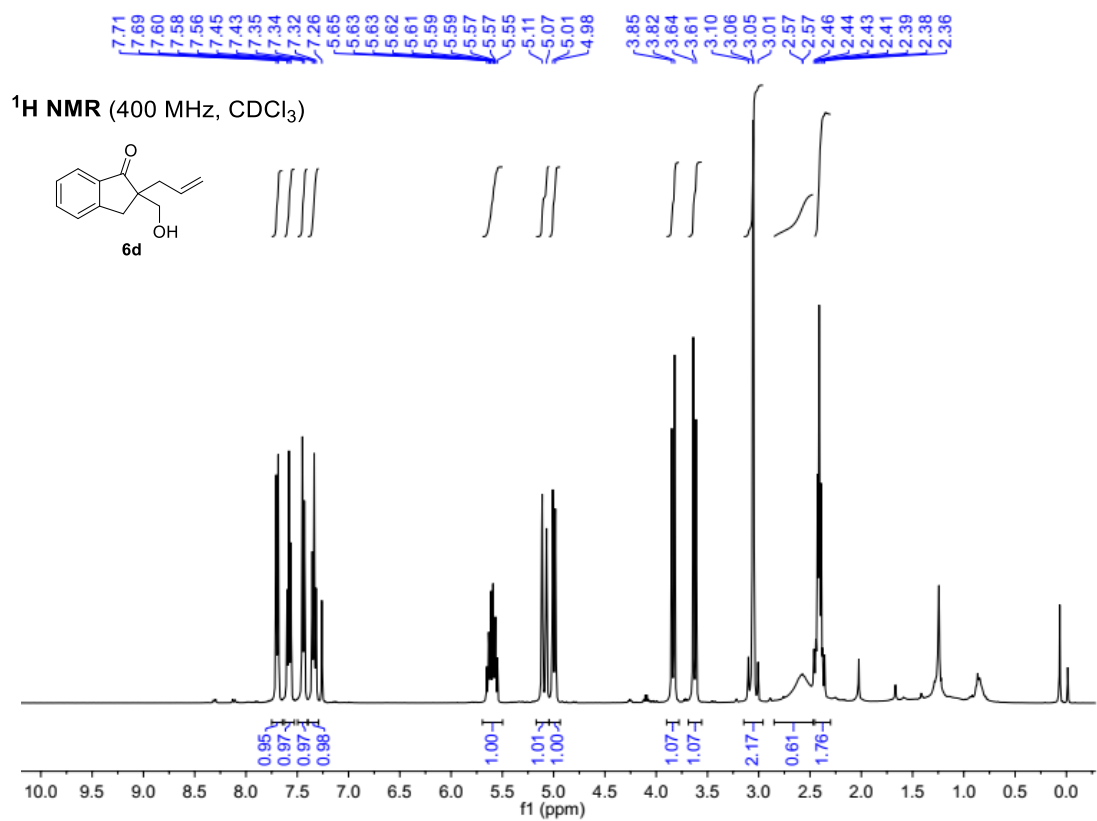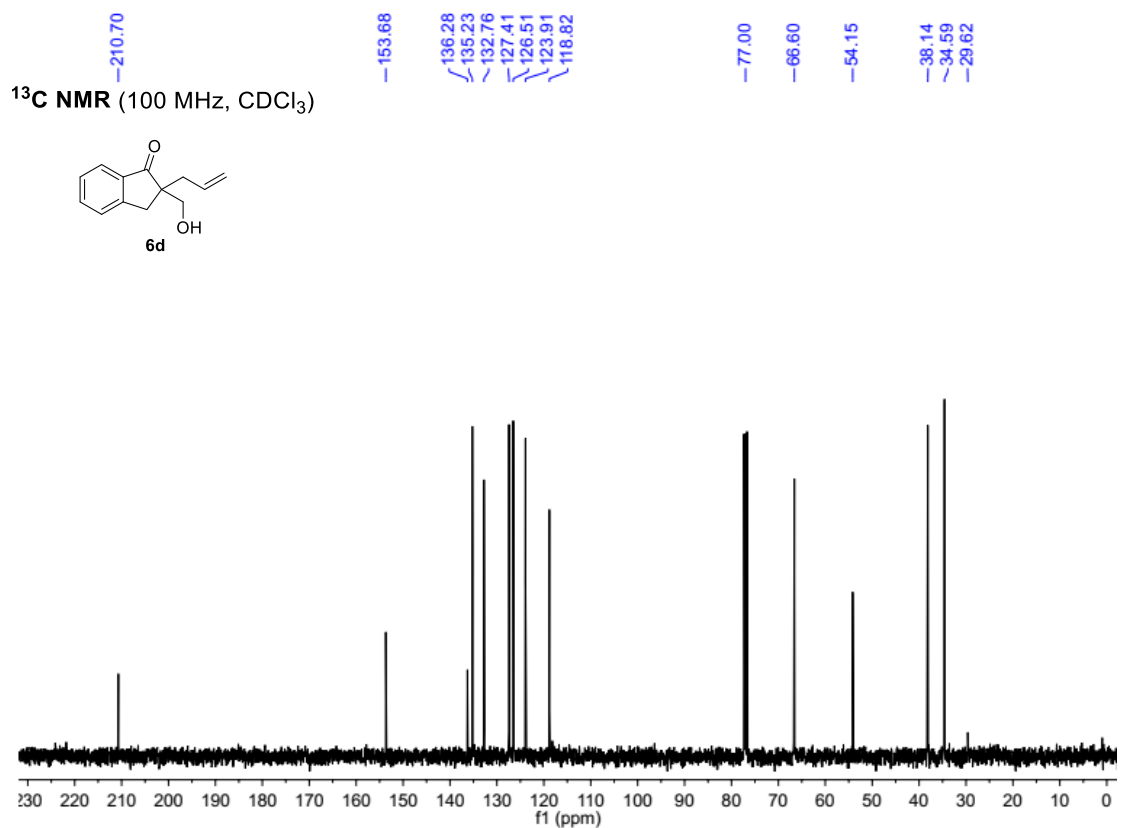



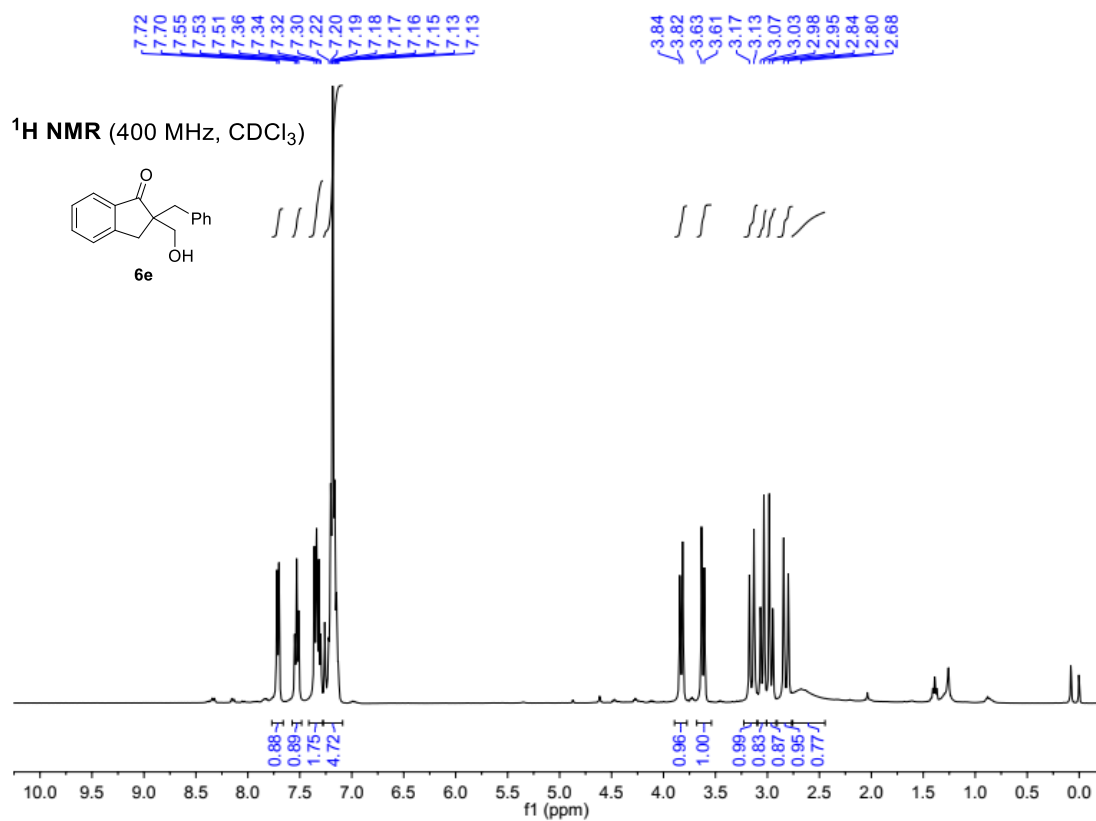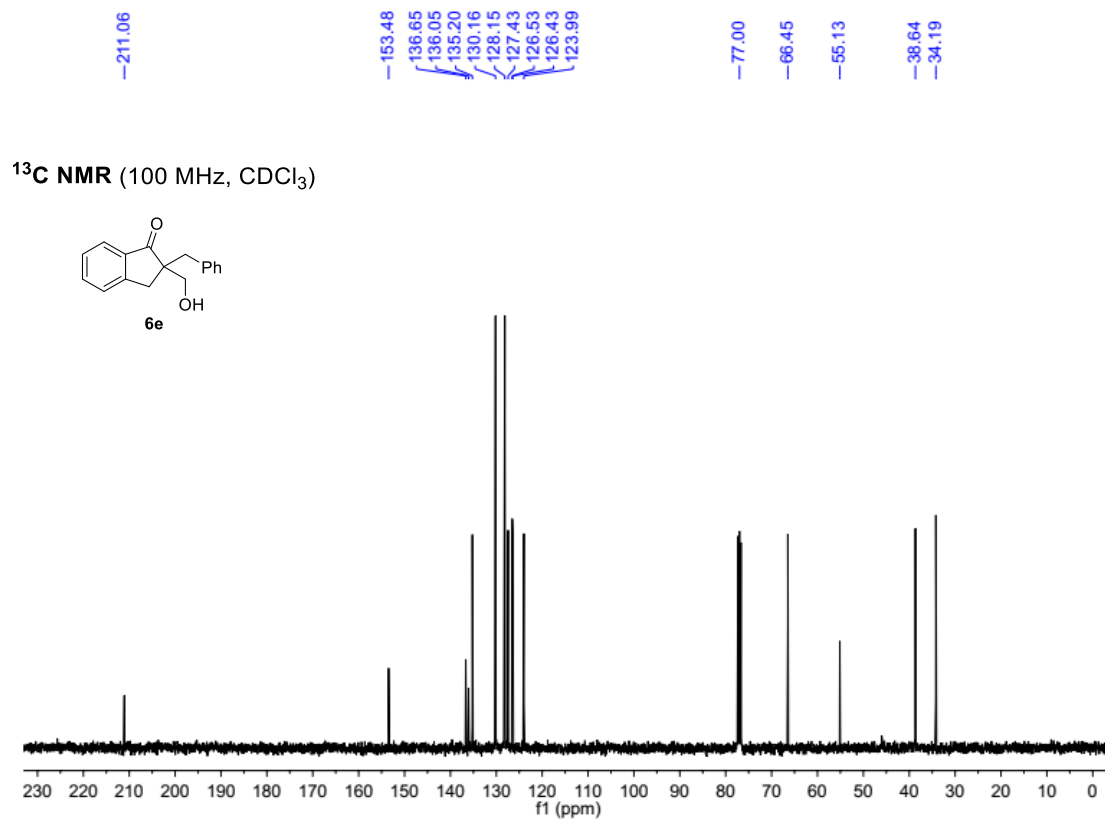

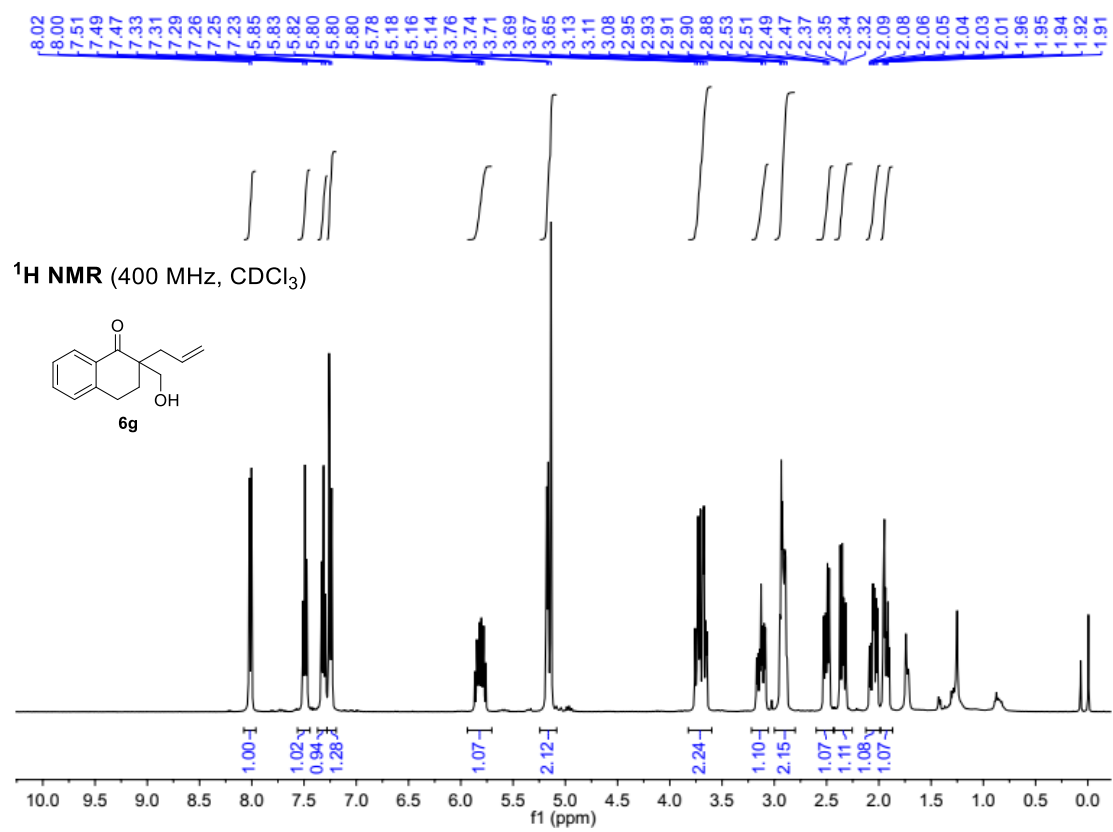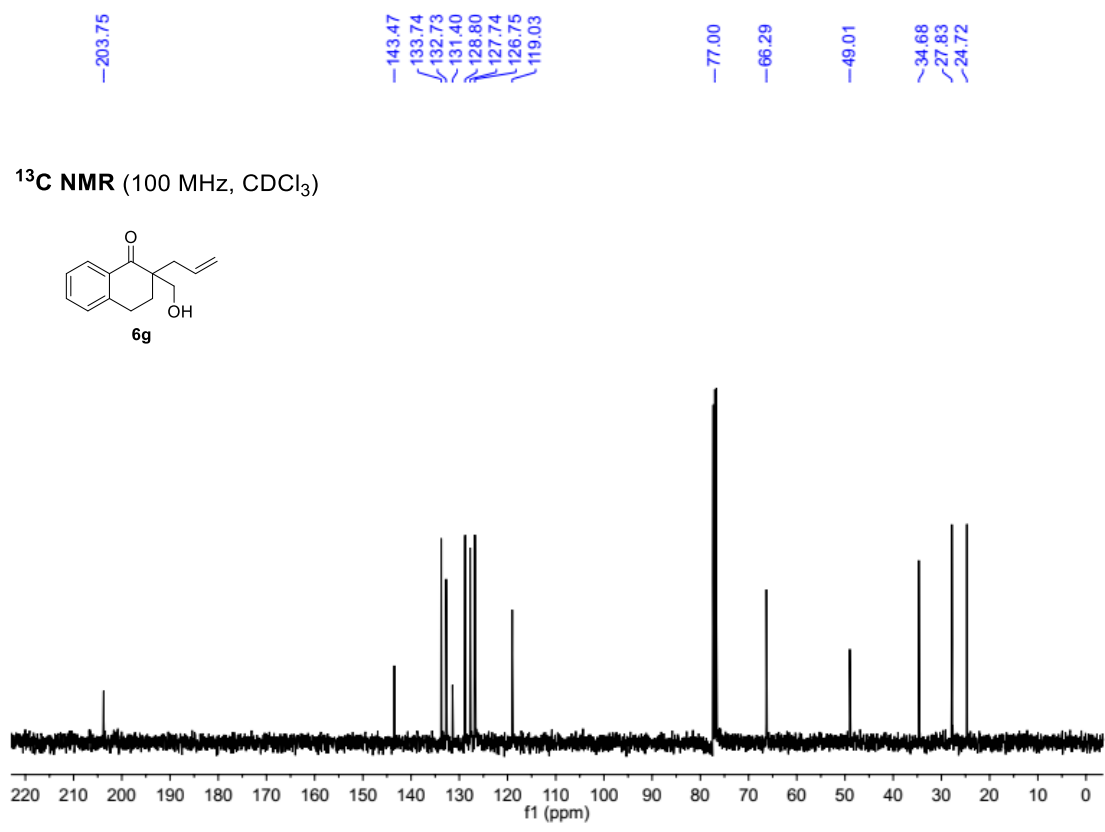

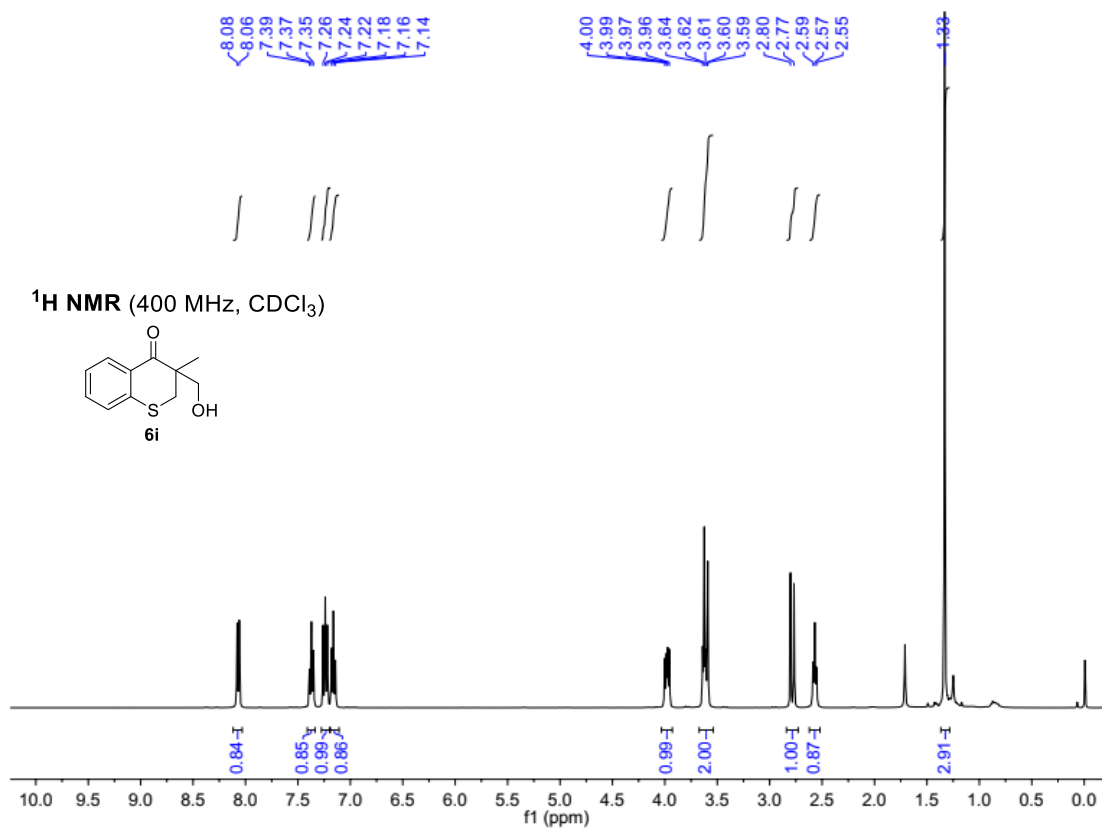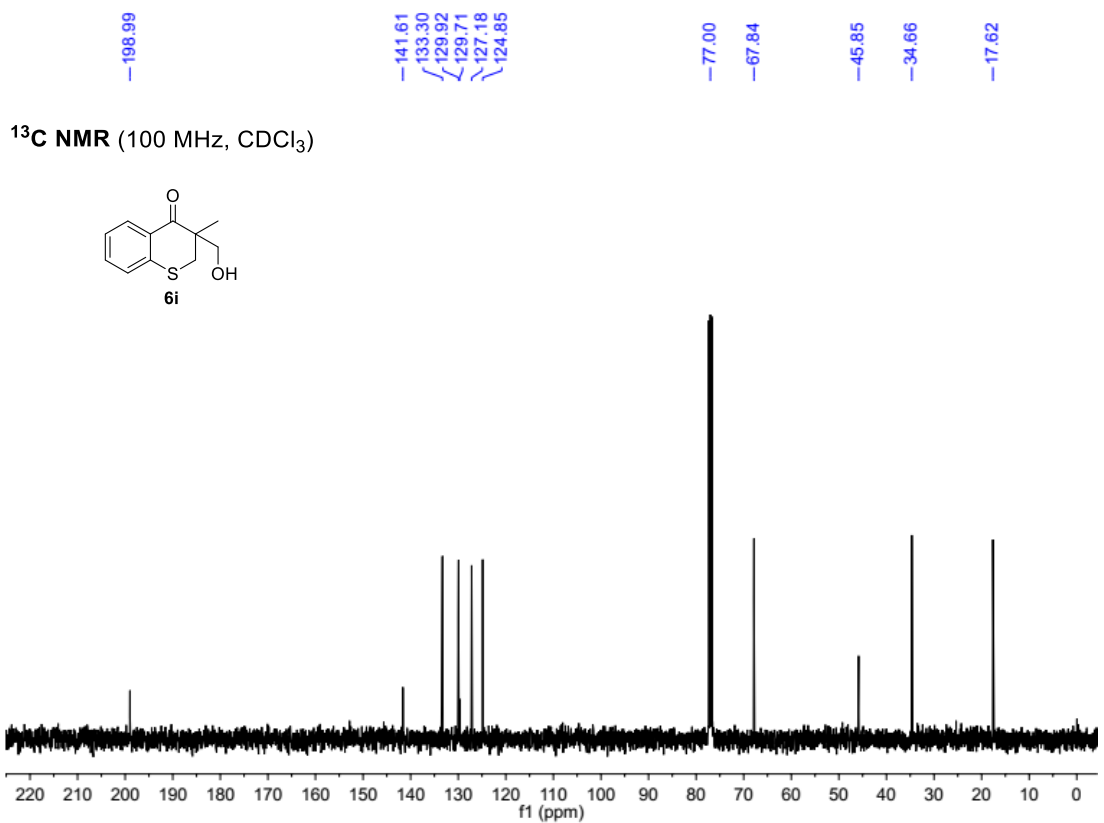

<sup>1</sup>H NMR (400 MHz, CDCl<sub>3</sub>)

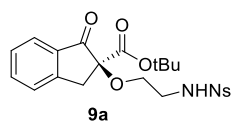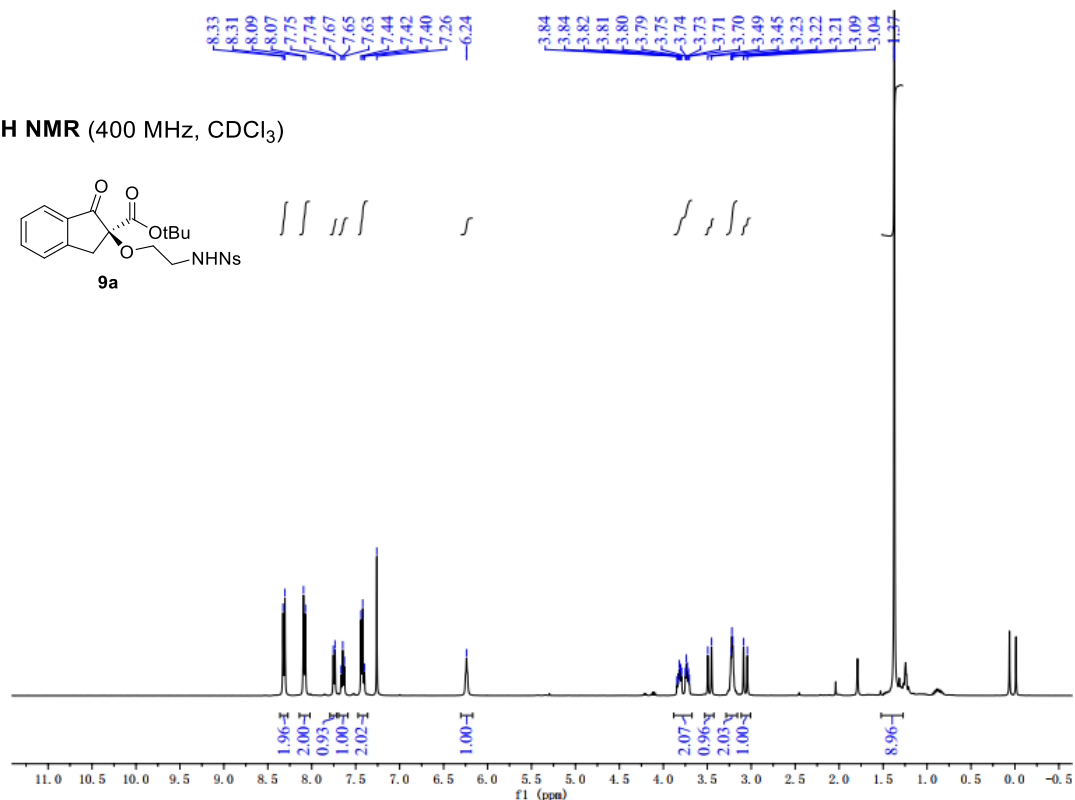

HPLC spectrum of compound **9a**:

Racemate:

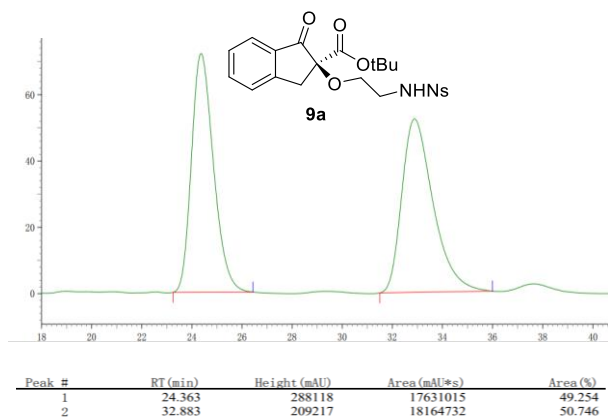

Enantioselective:

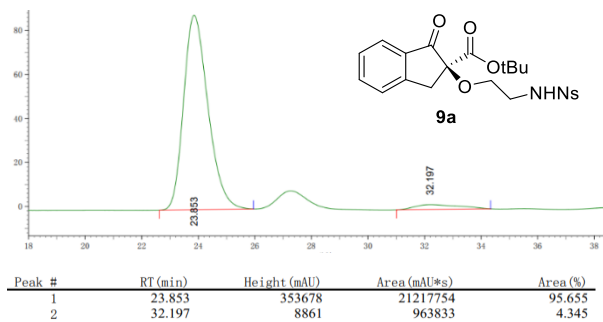

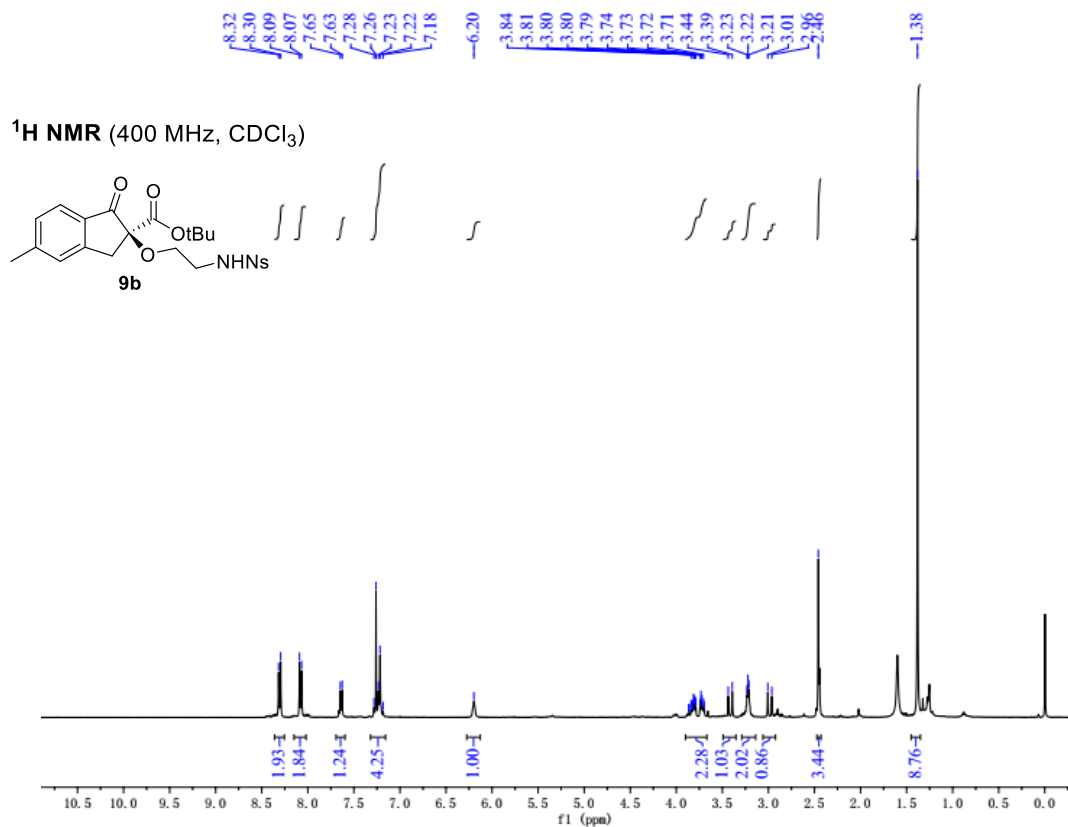

HPLC spectrum of compound **9b**:

Racemate:

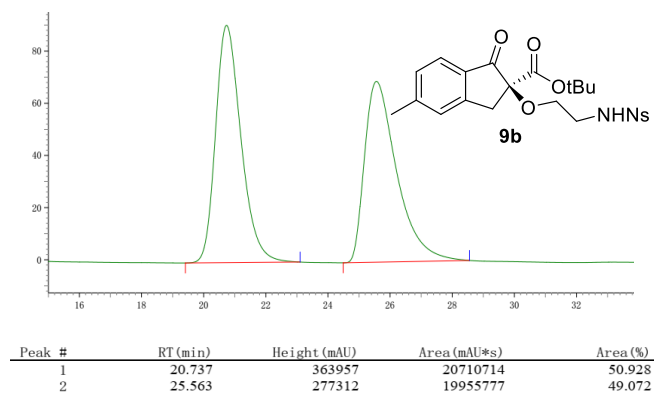

Enantioselective:

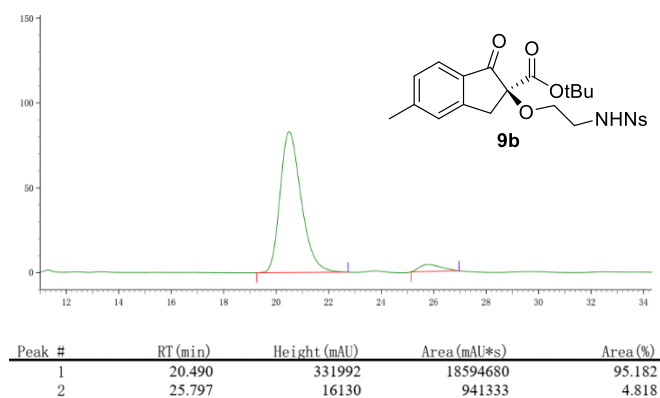

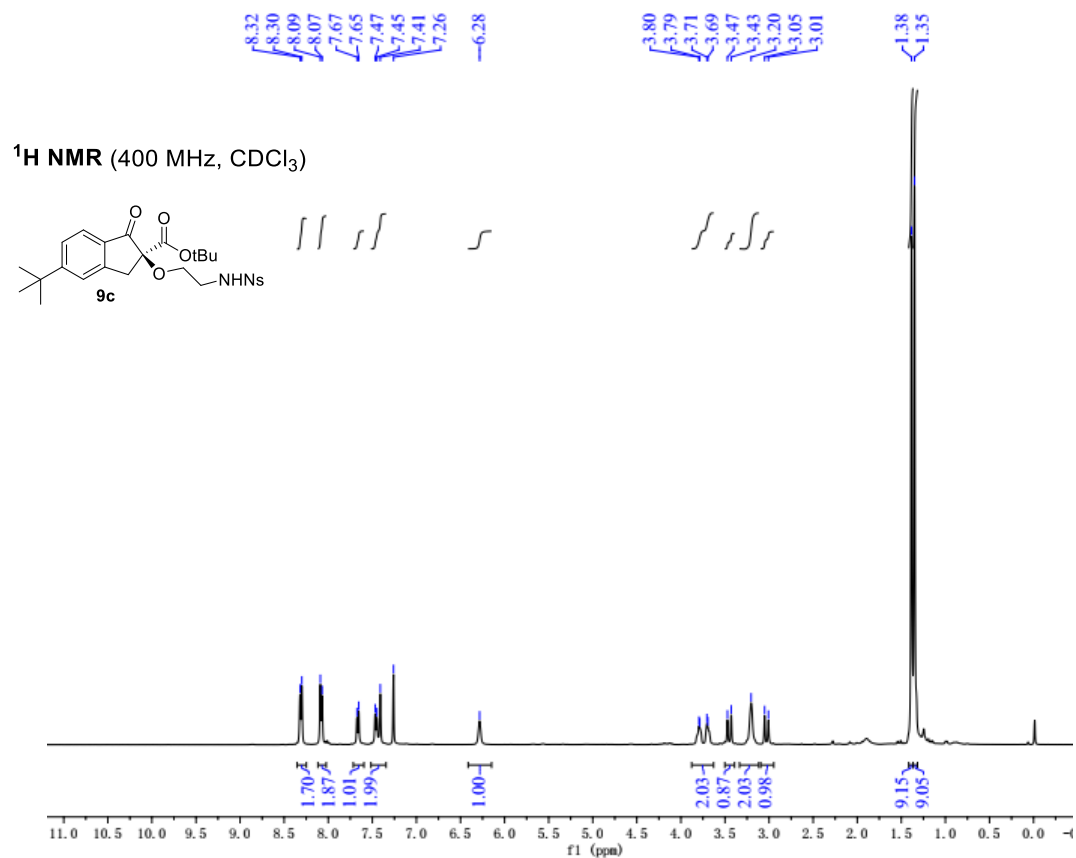

HPLC spectrum of compound **9c**:

Racemate:

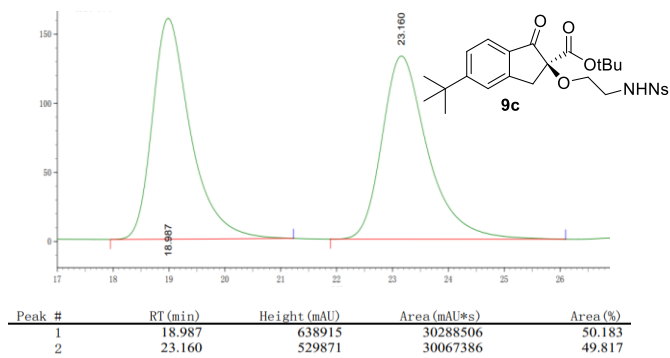

Enantioselective:

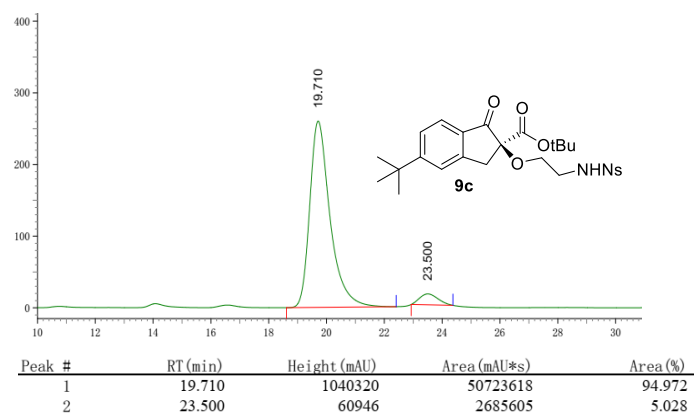

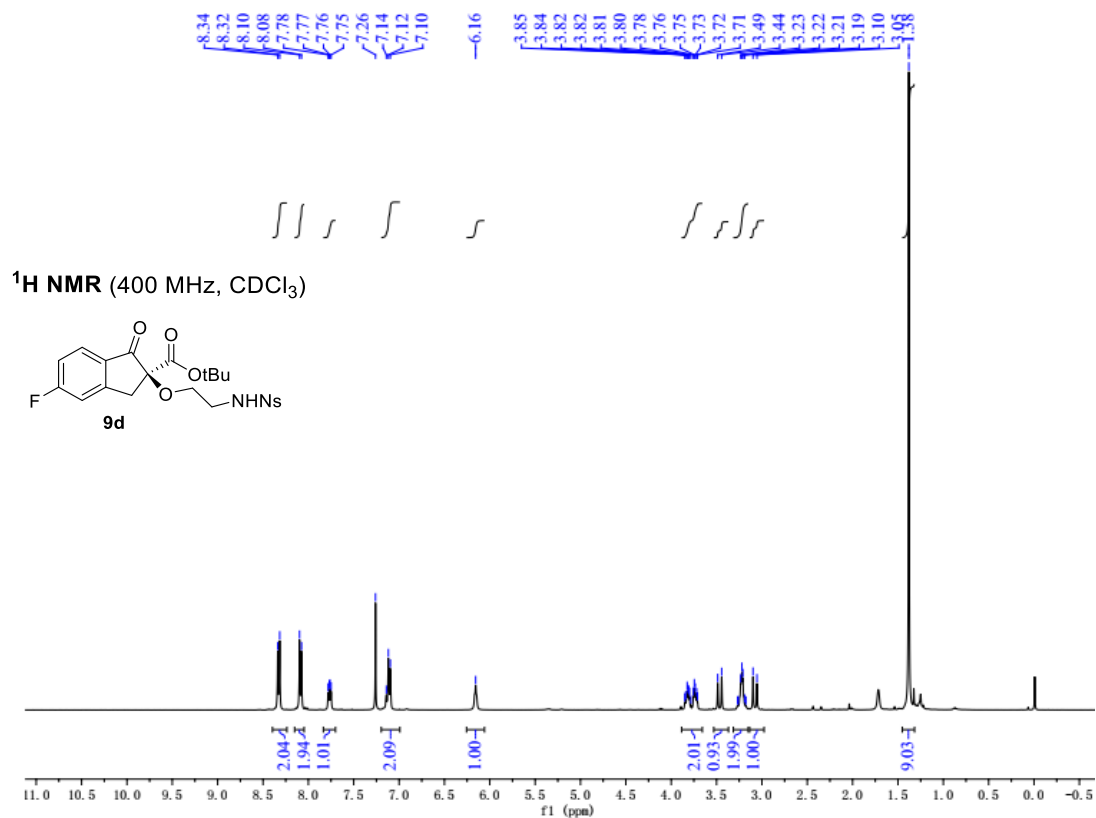

HPLC spectrum of compound **9d**:

Racemate:

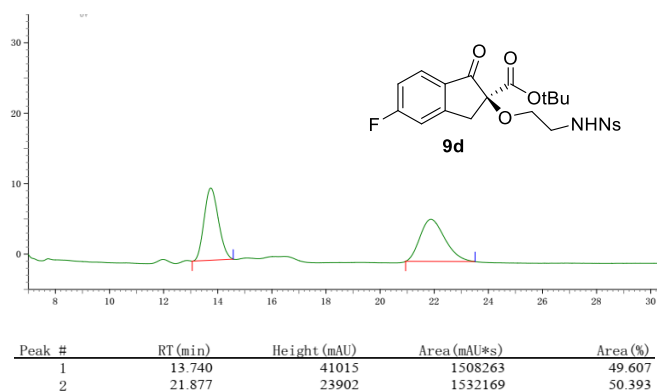

Enantioselective:

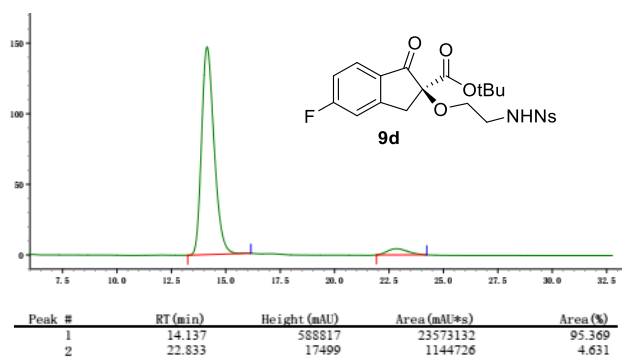

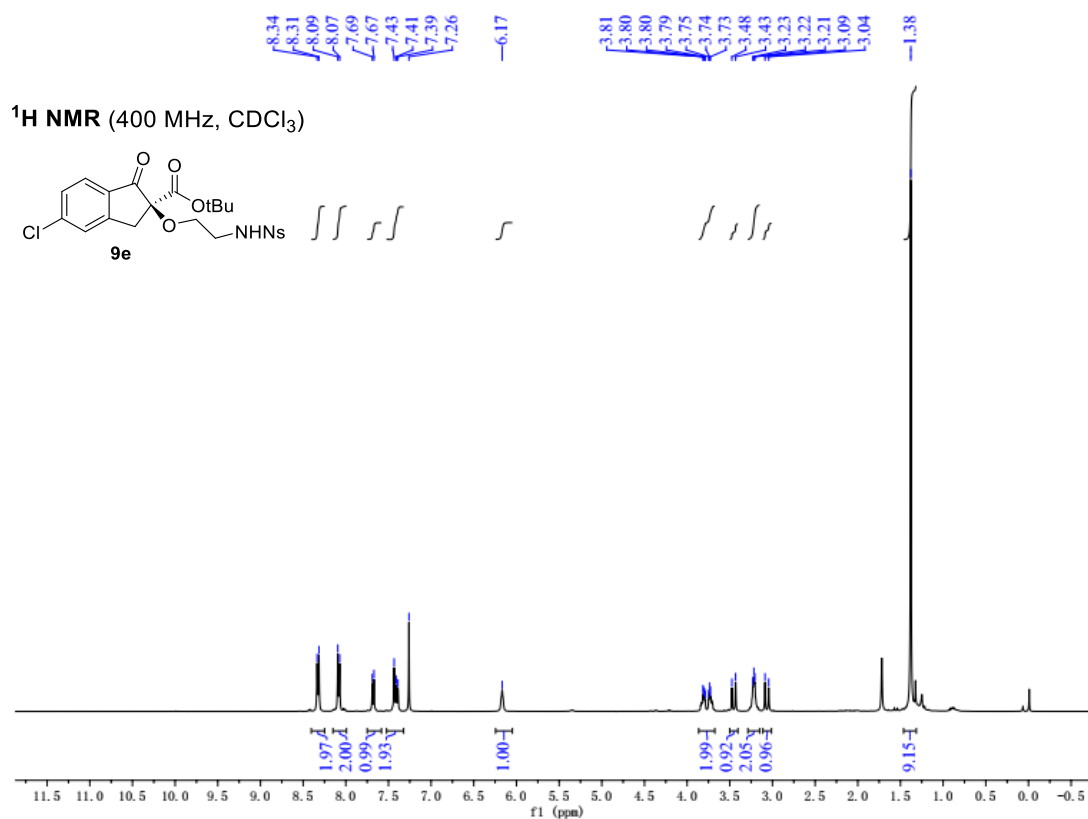

HPLC spectrum of compound **9e**:

Racemate:

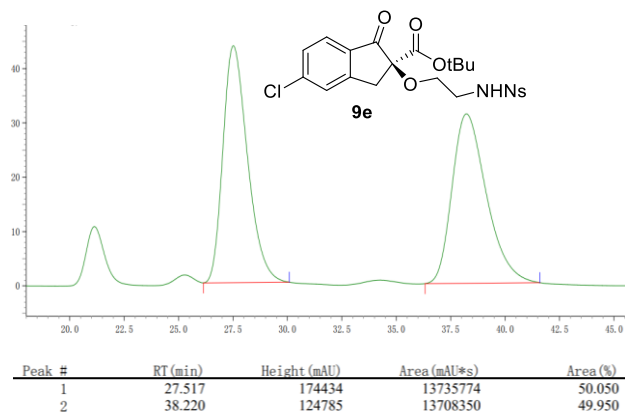

Enantioselective:

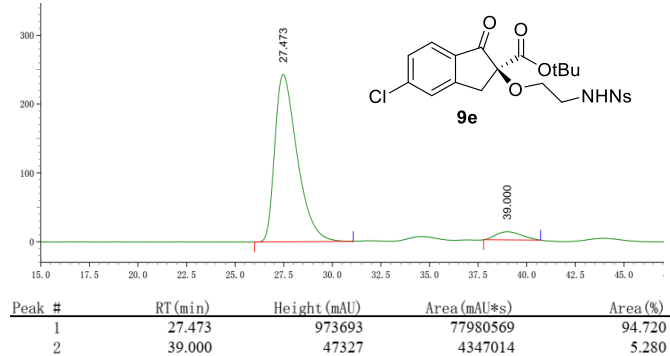



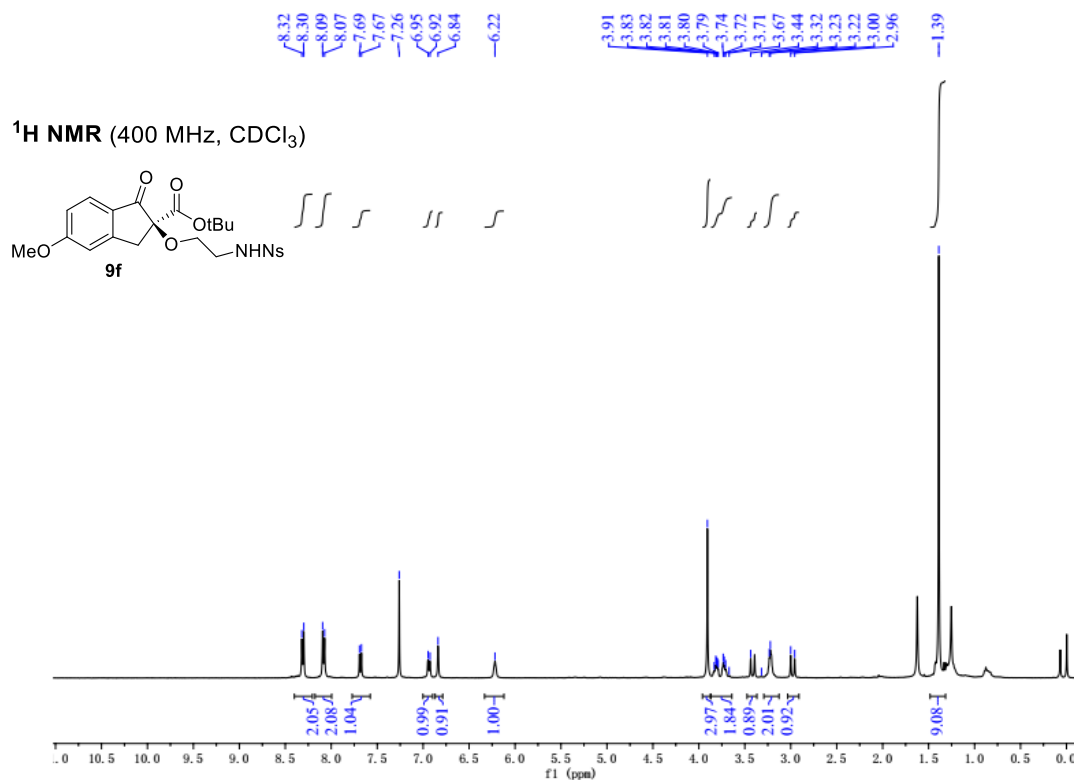

HPLC spectrum of compound **9f**:

Racemate:

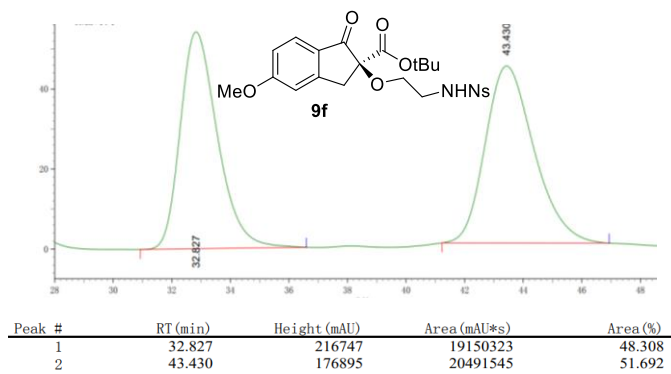

Enantioselective:

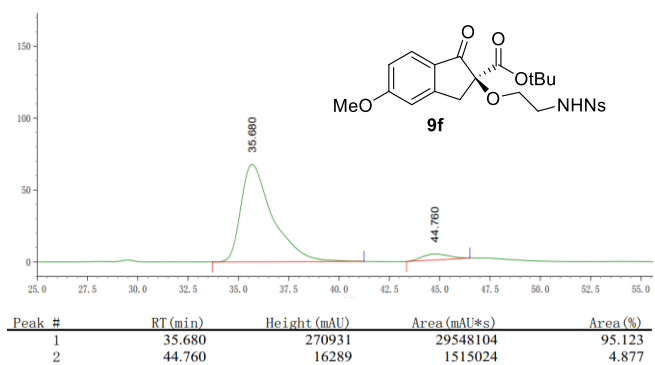

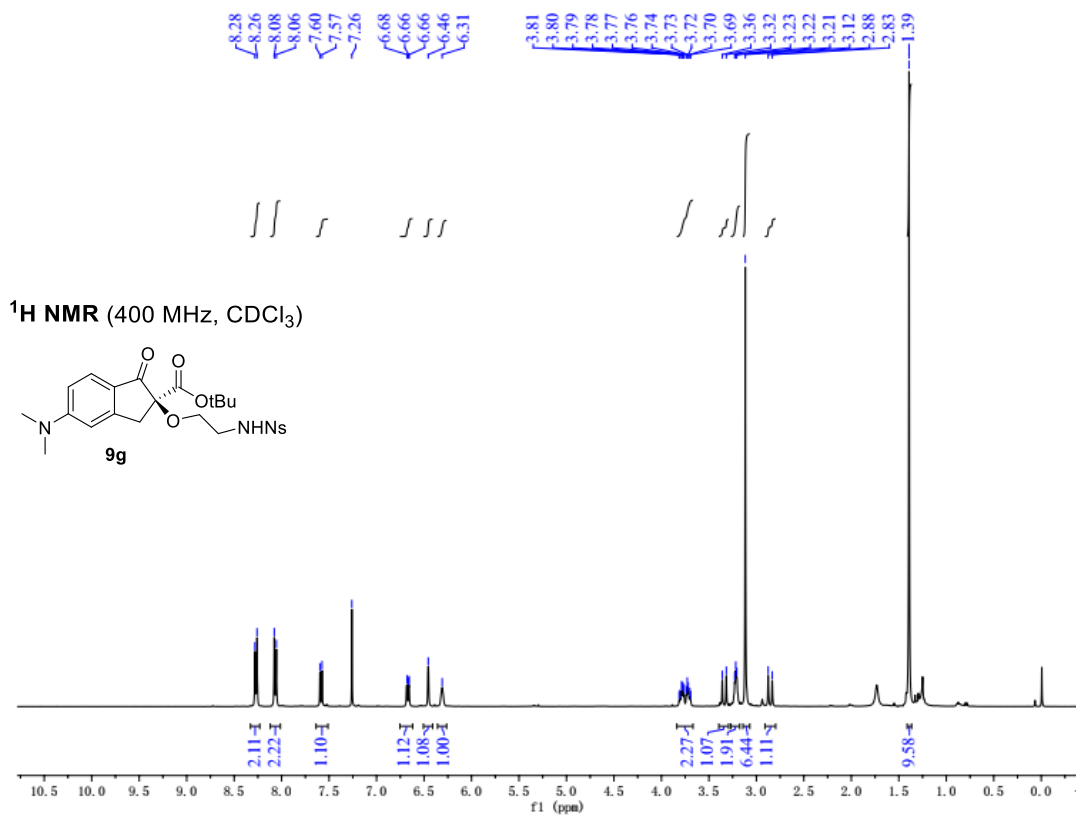

HPLC spectrum of compound **9g**:

Racemate:

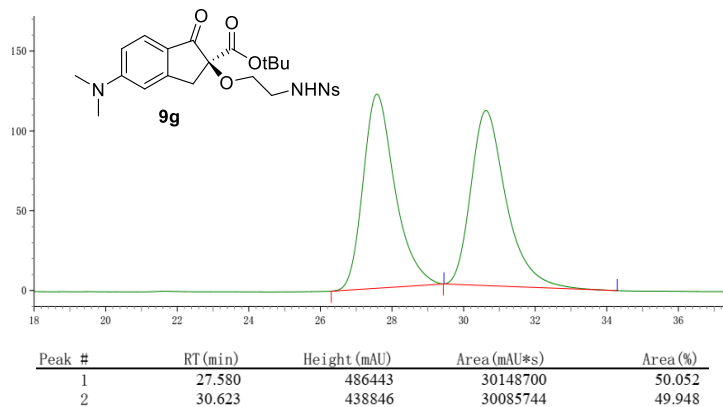

Enantioselective:

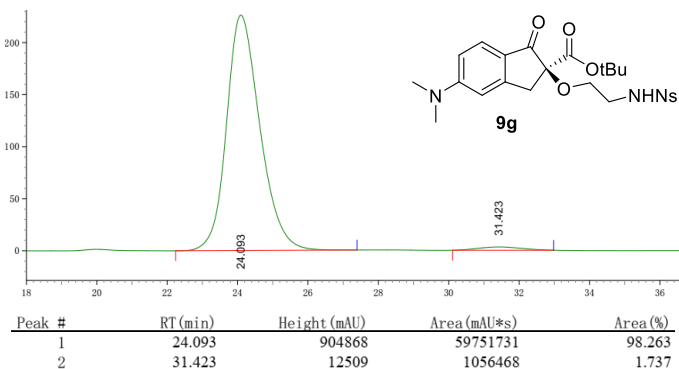

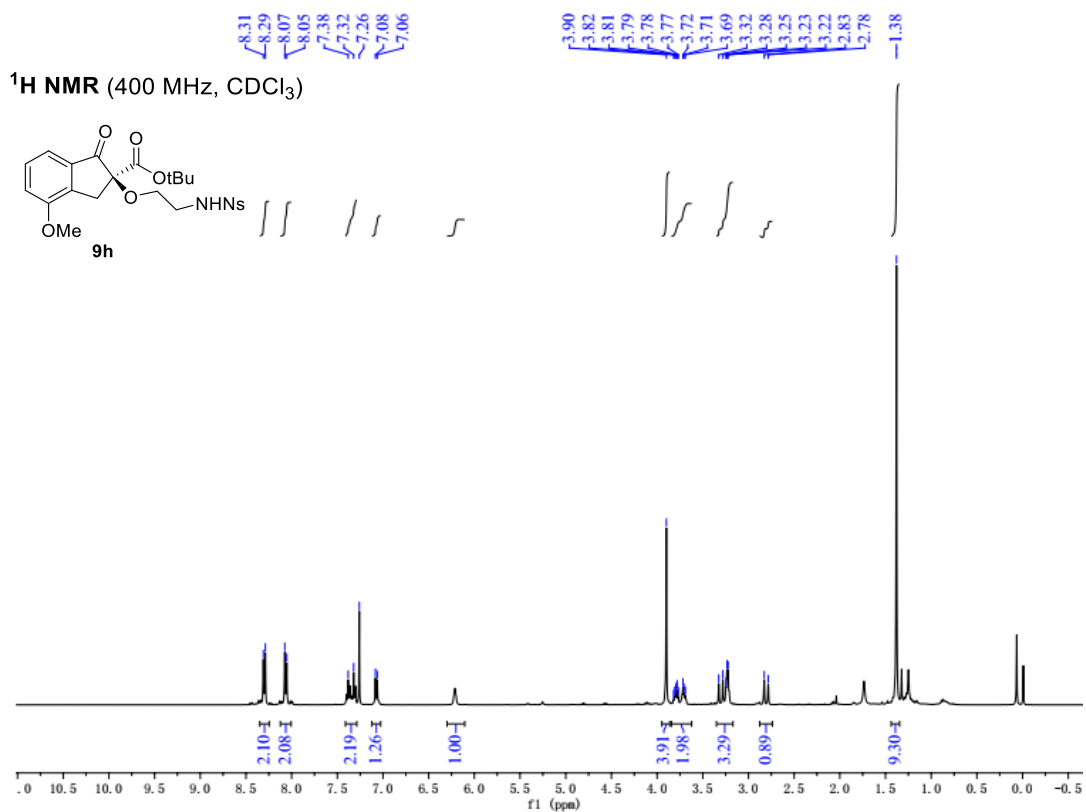

HPLC spectrum of compound **9h**:

Racemate:

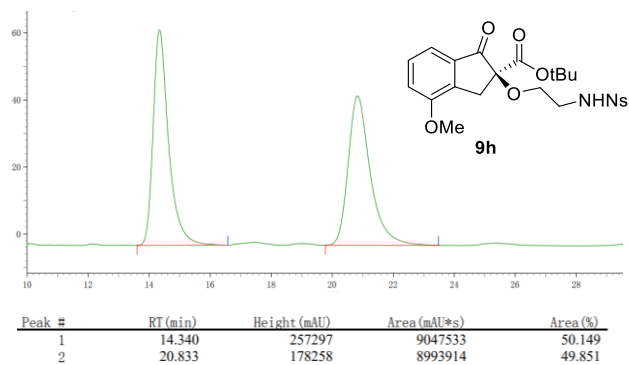

Enantioselective:

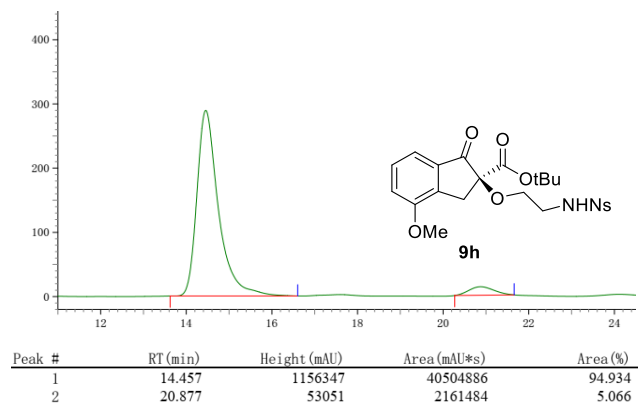

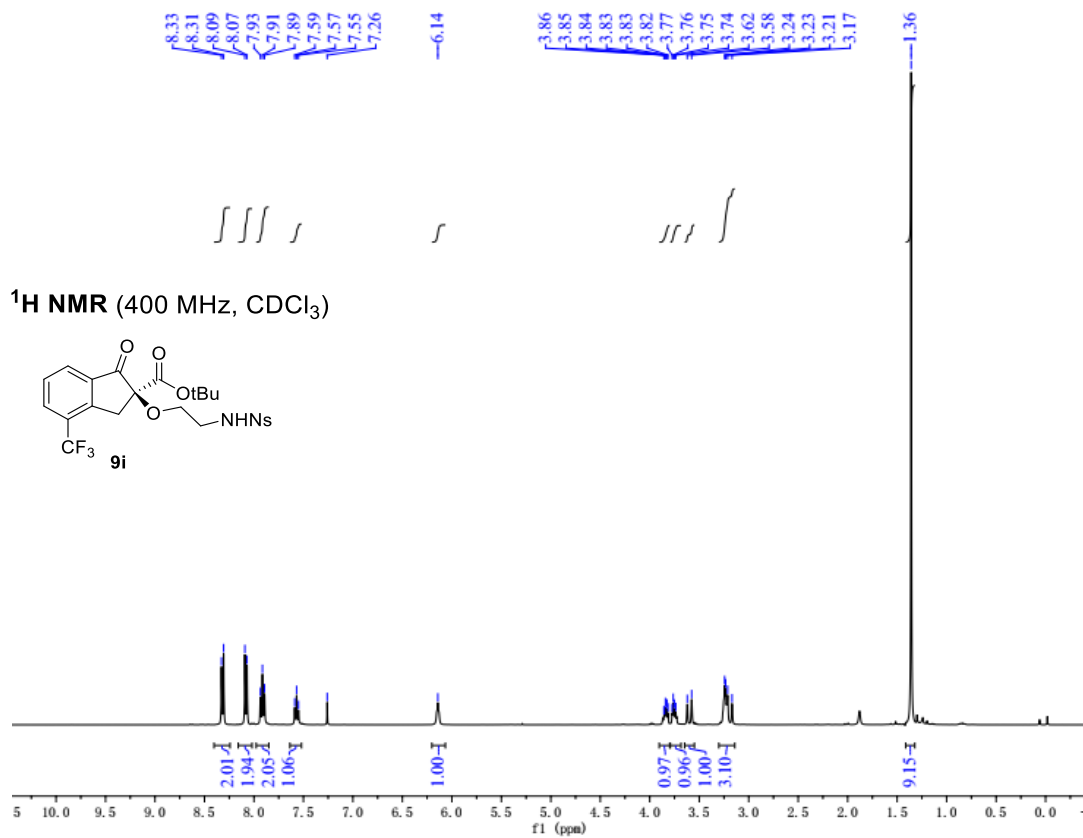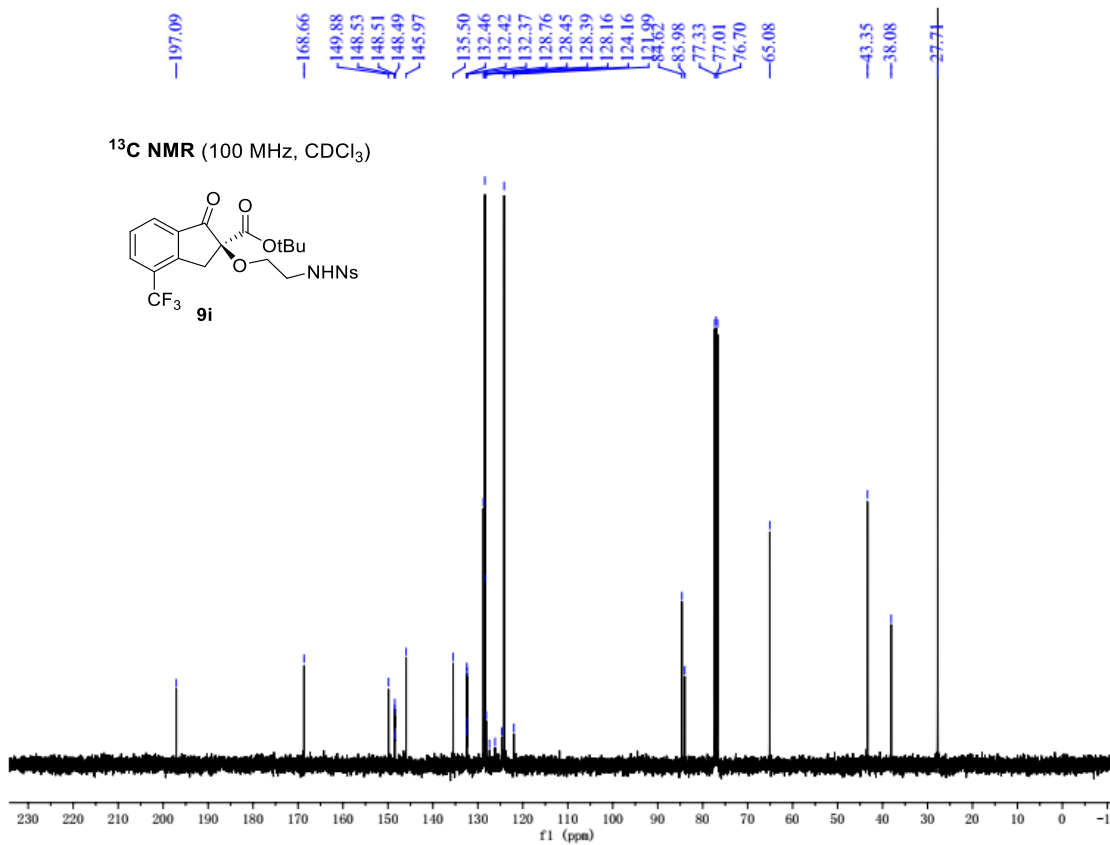

## HPLC spectrum of compound **9i**:

Racemate:

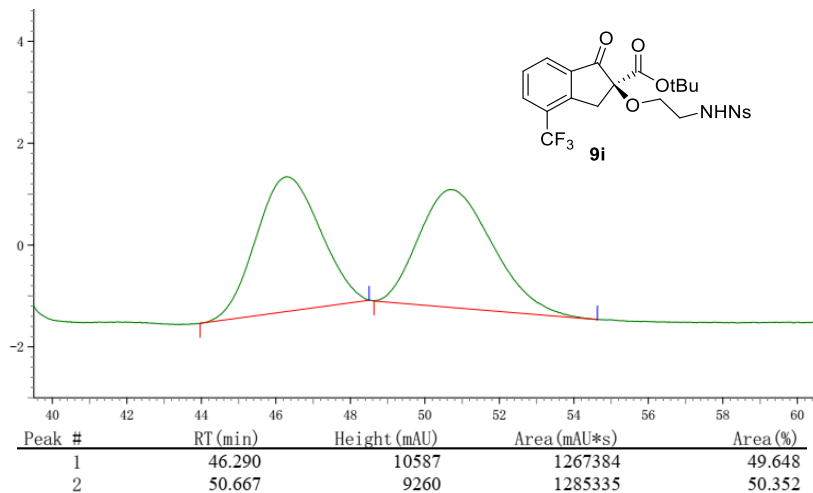

Enantioselective:

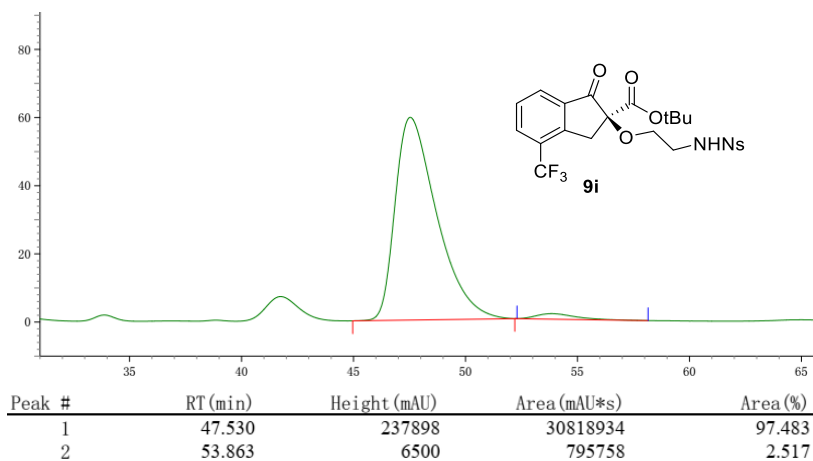

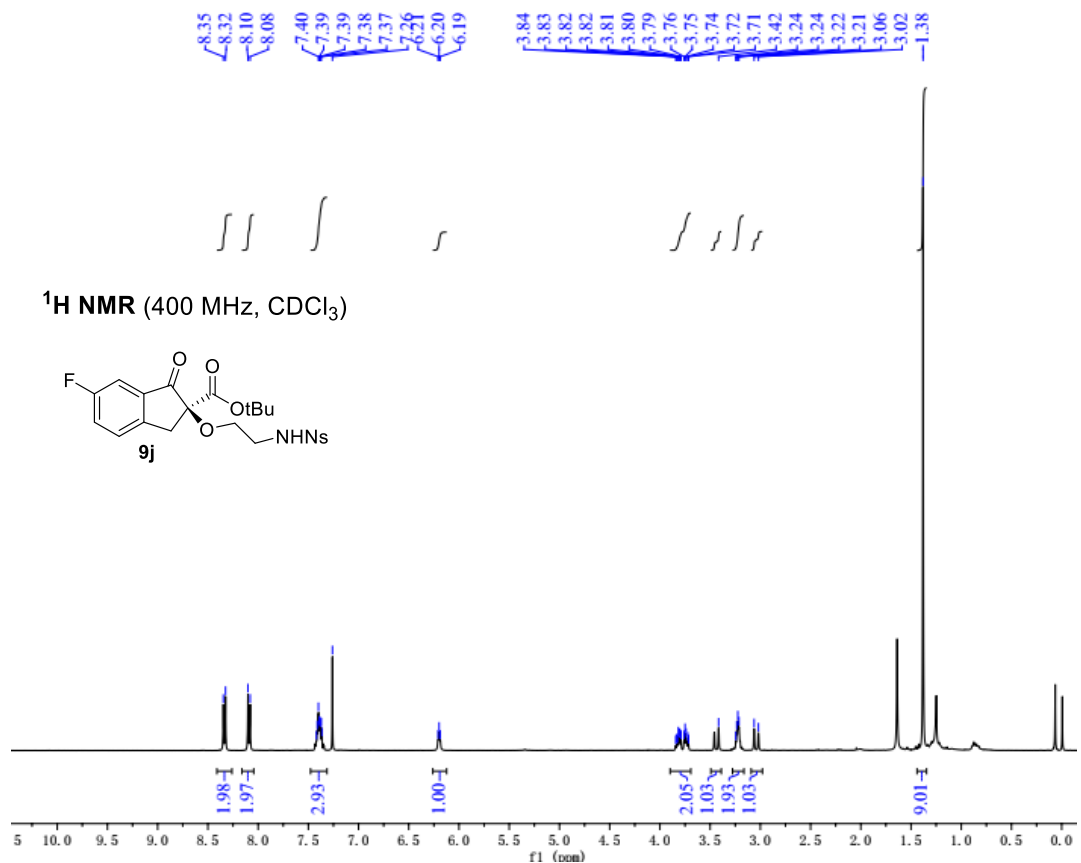

HPLC spectrum of compound **9j**:

Racemate:

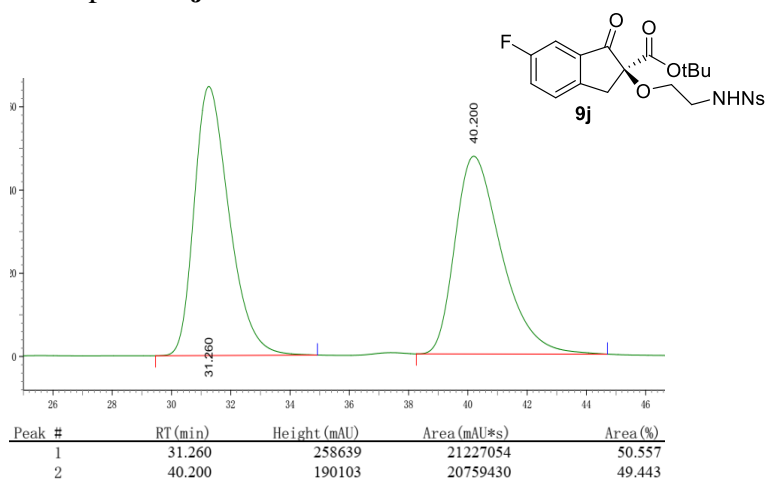

Enantioselective:

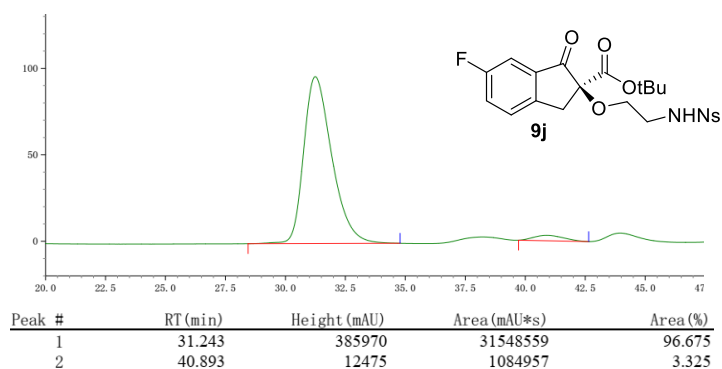

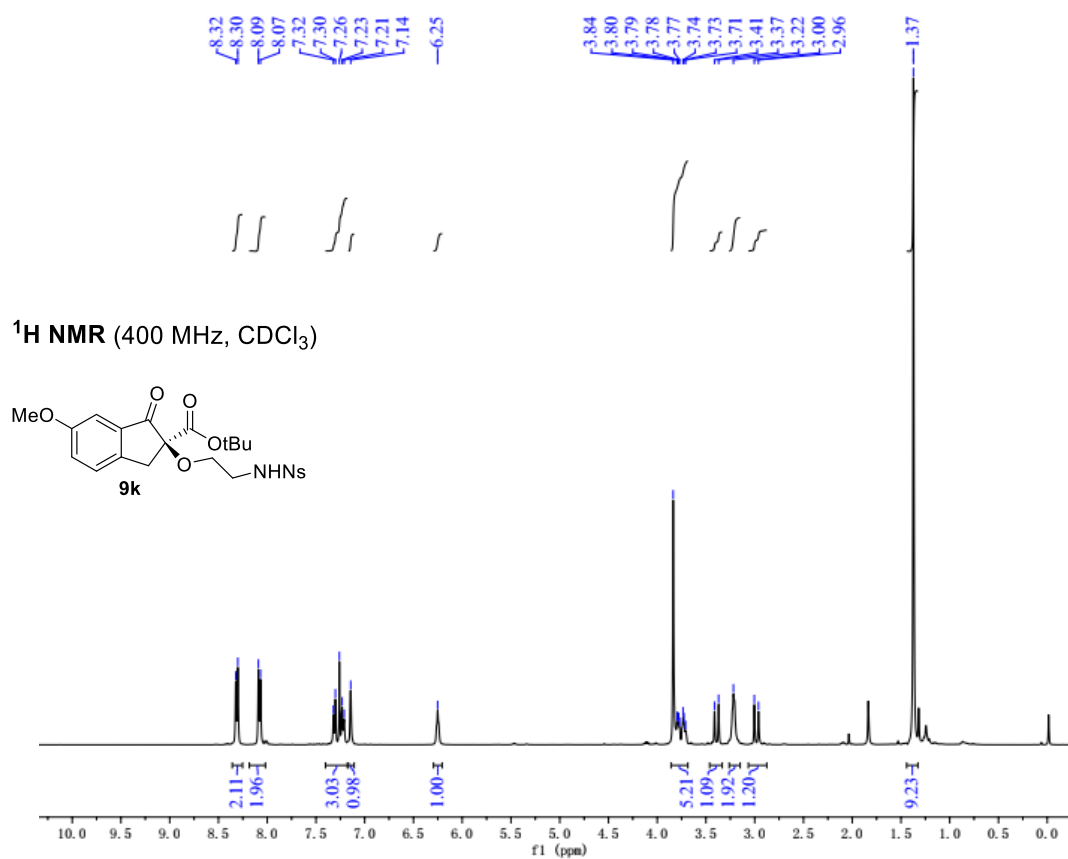

HPLC spectrum of compound **9k**:

Racemate:

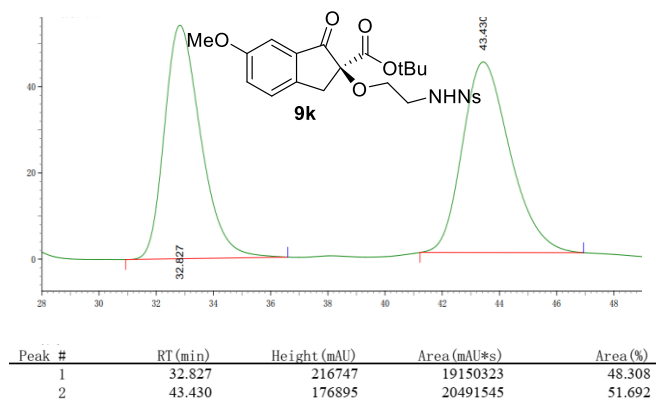

Enantioselective:

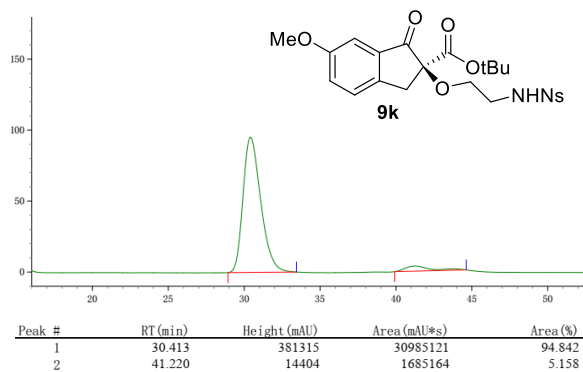

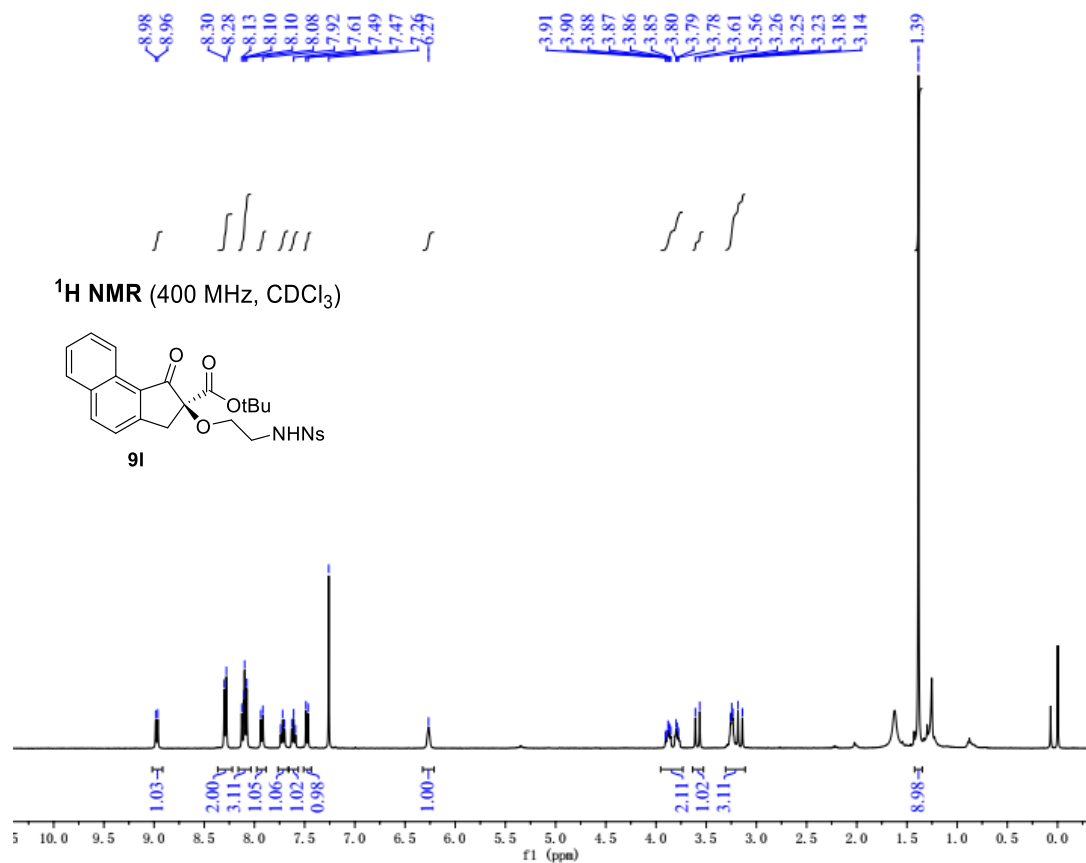

HPLC spectrum of compound **9l** :

Racemate:

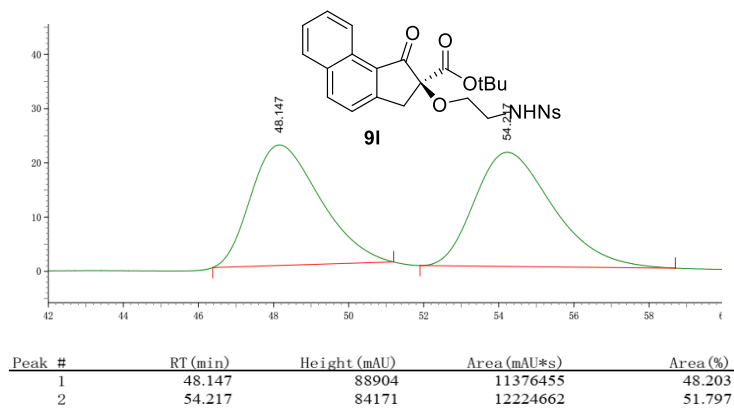

Enantioselective:

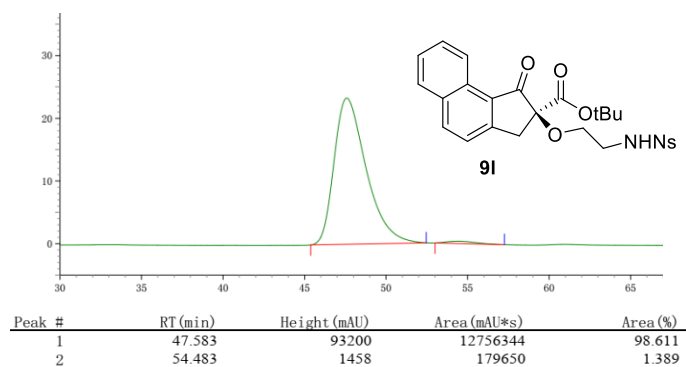



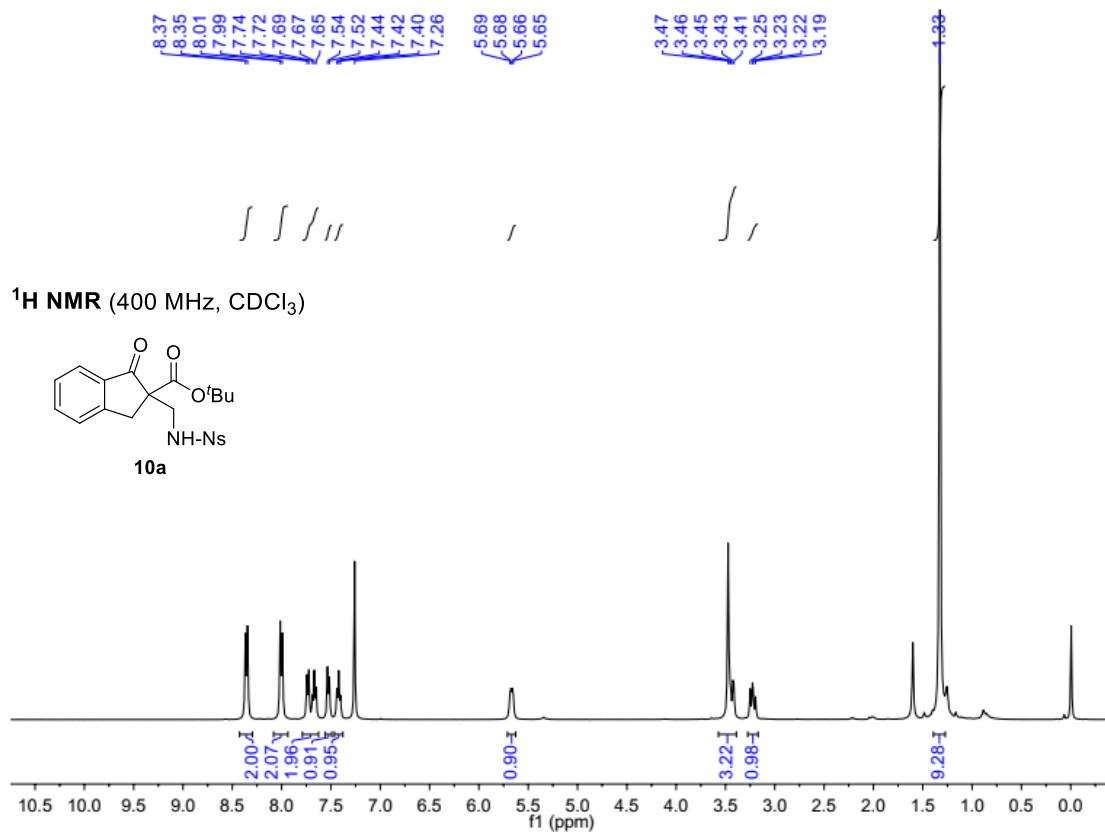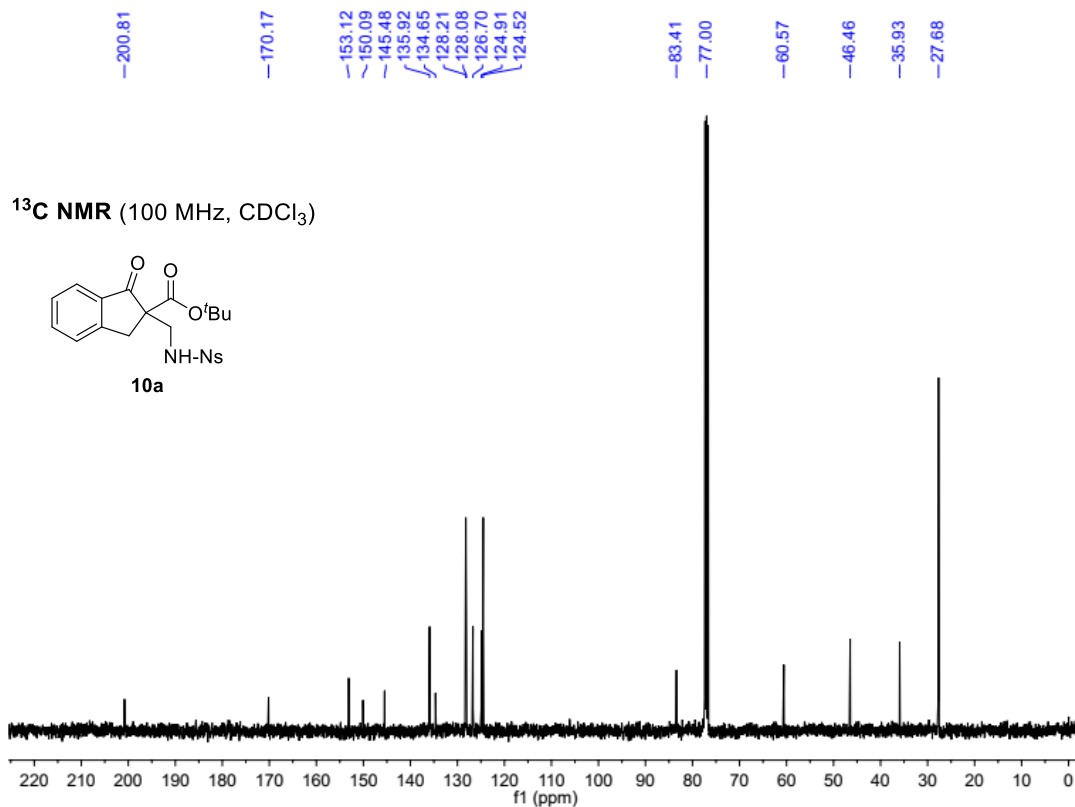

### HPLC spectrum of compound **10a**:

Racemate:

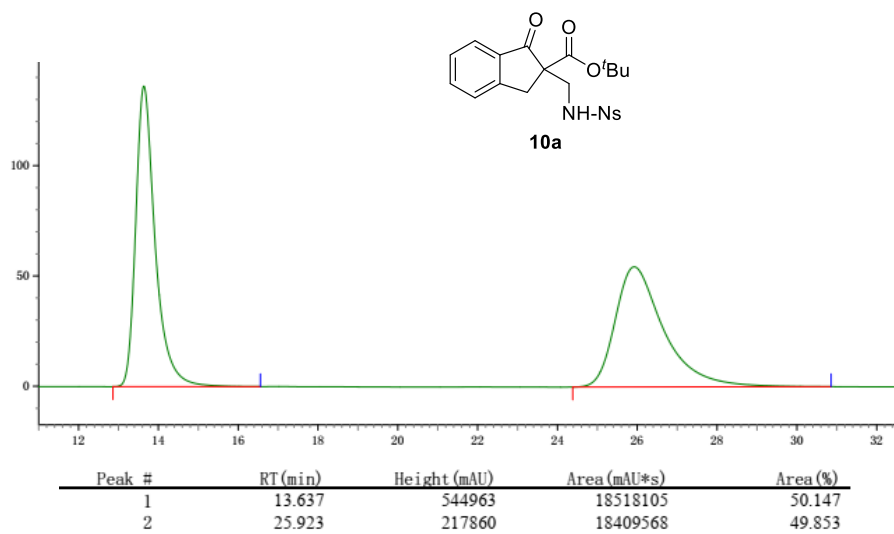

Enantioselective:

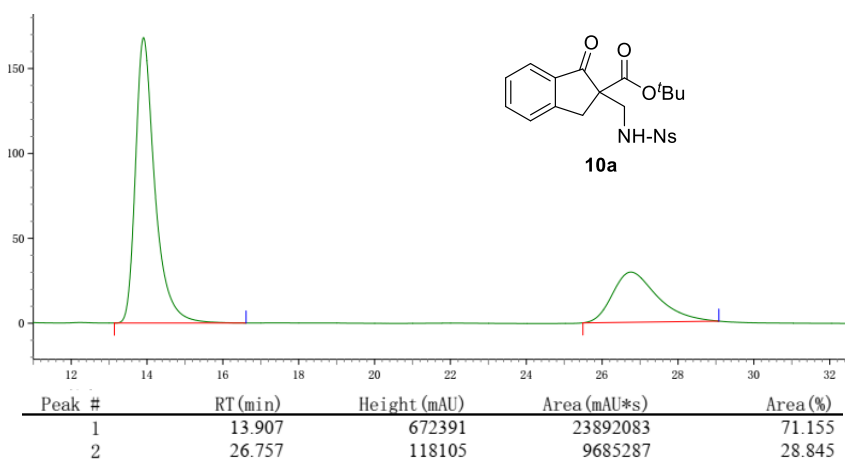

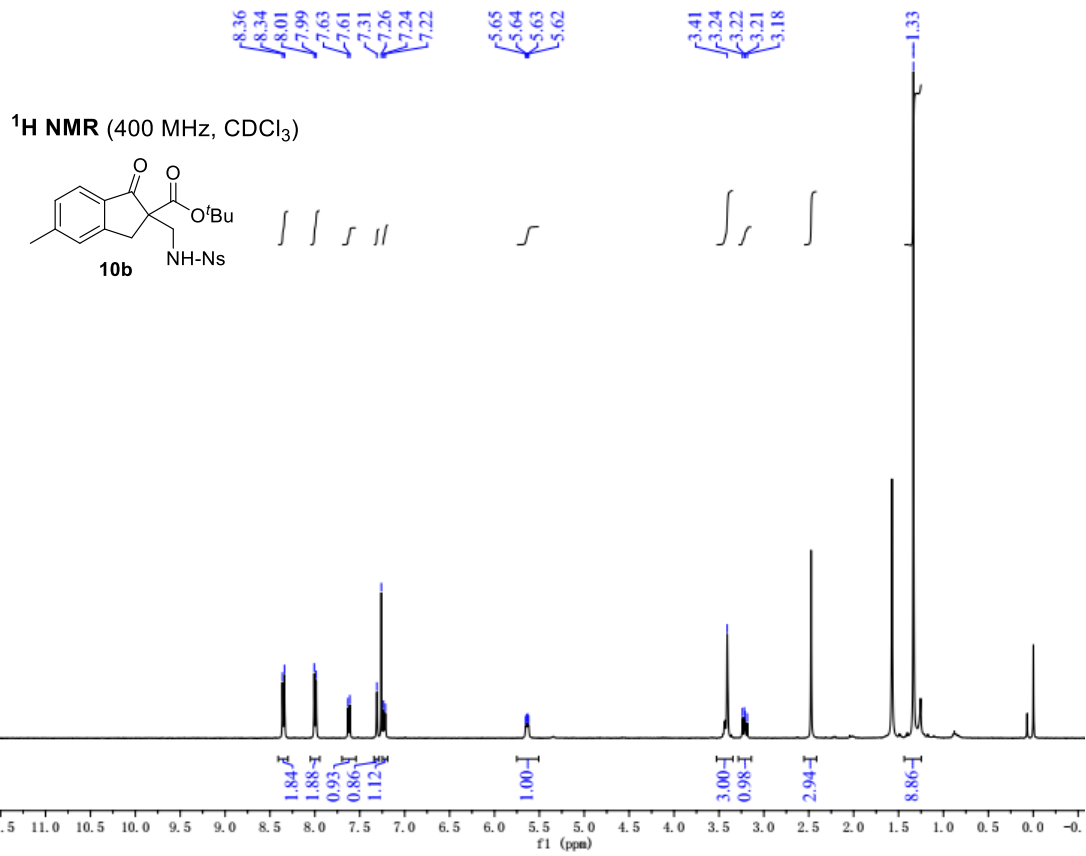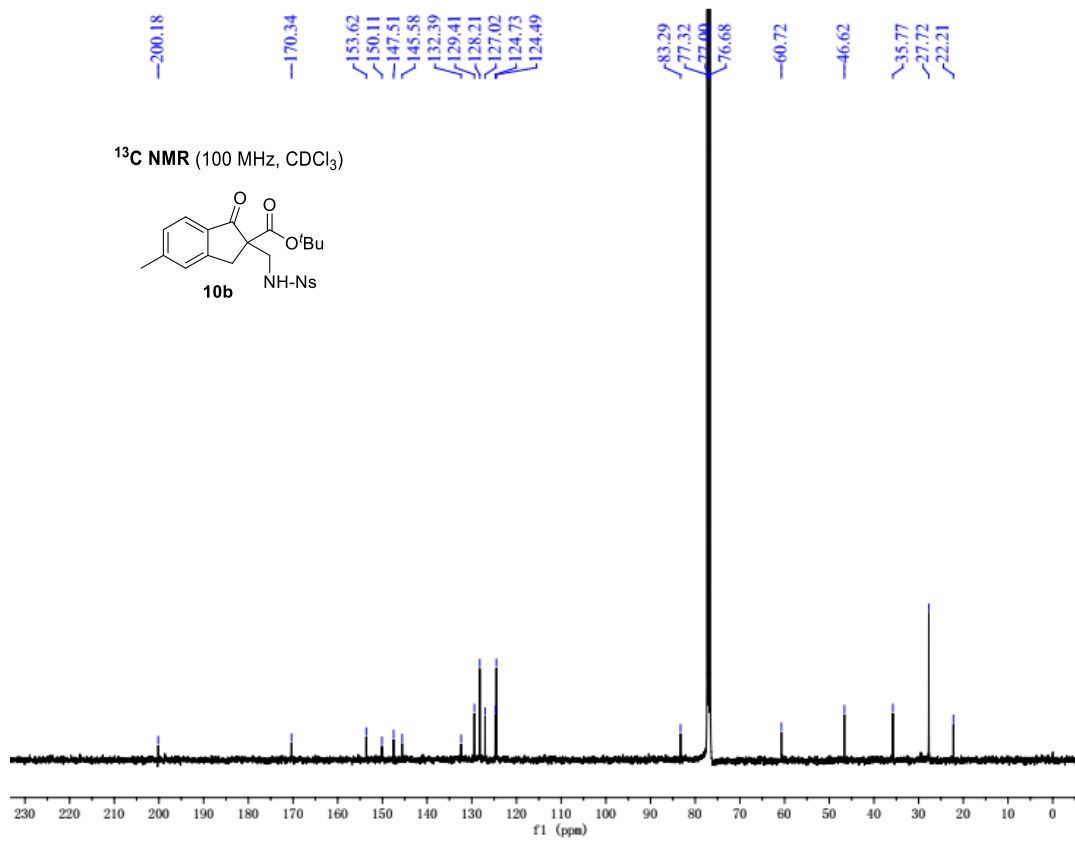

### HPLC spectrum of compound **10b**:

Racemate:

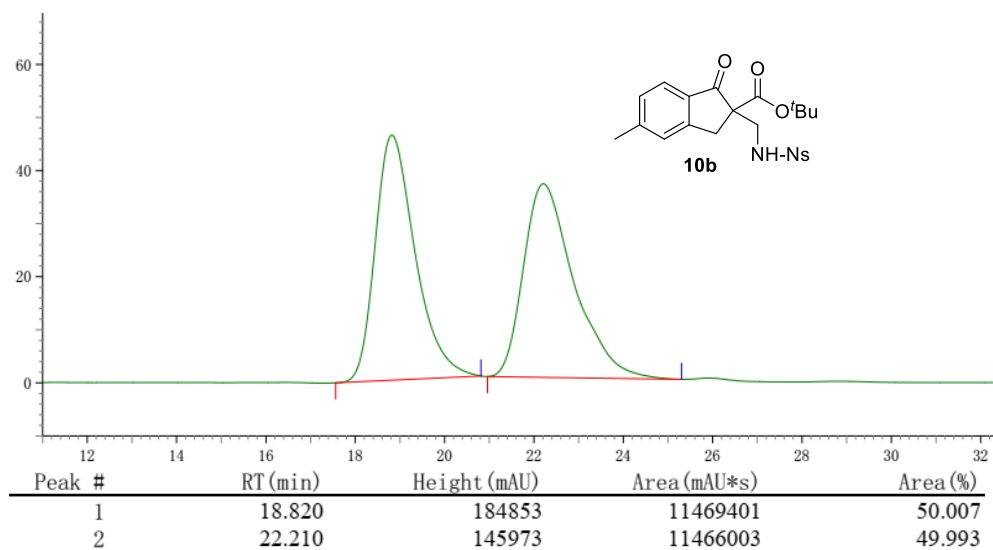

Enantioselective:

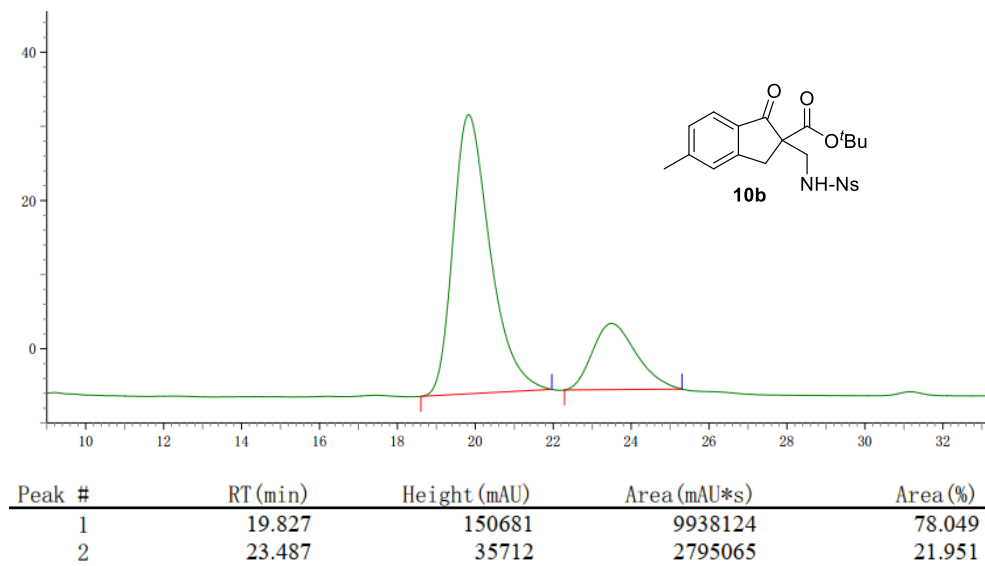

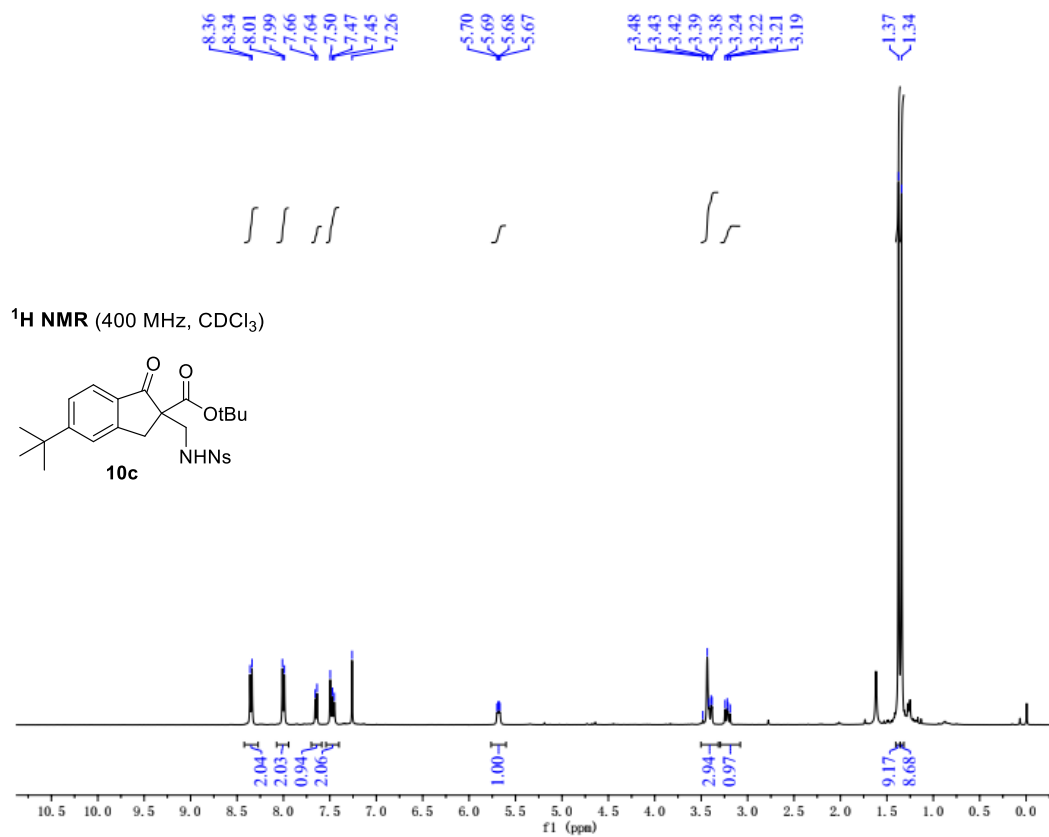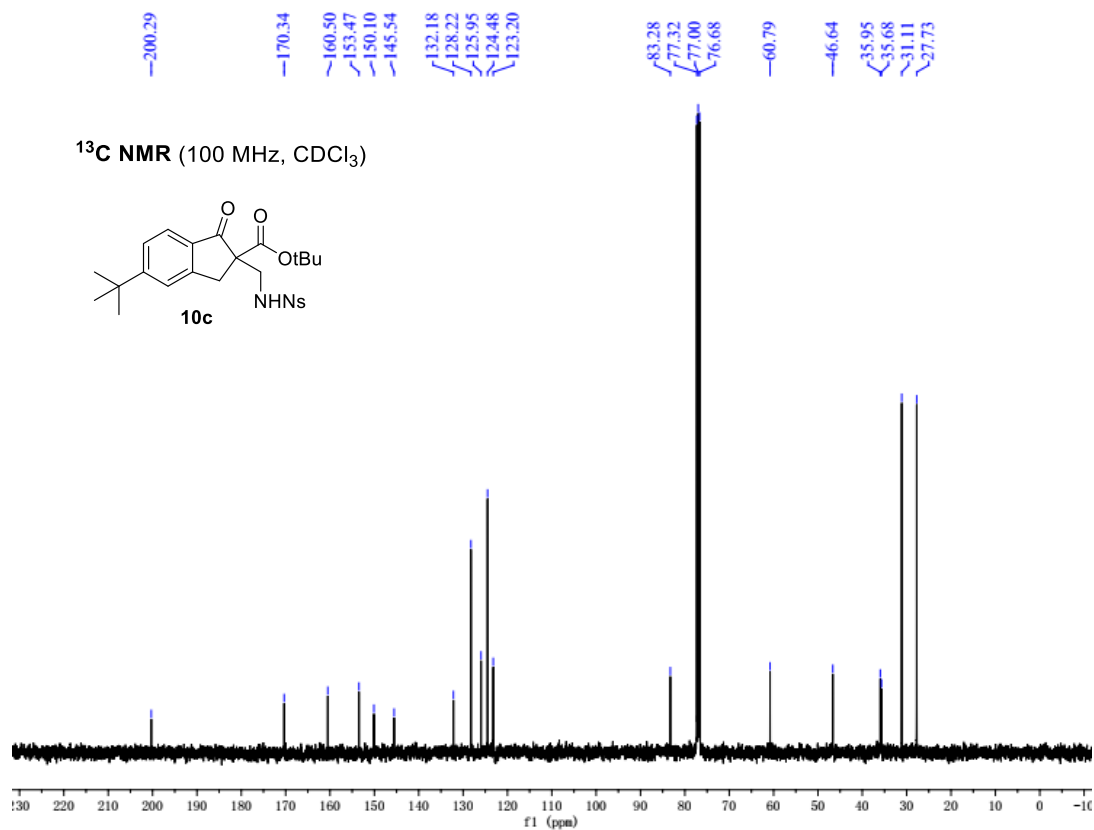

## HPLC spectrum of compound **10c**:

Racemate:

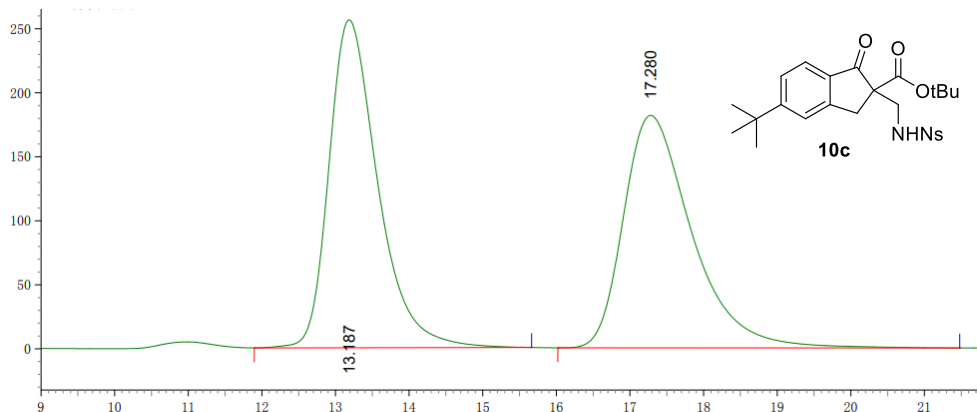

| Peak # | RT (min) | Height (mAU) | Area (mAU*s) | Area (%) |
|--------|----------|--------------|--------------|----------|
| 1      | 13.187   | 1024541      | 47243497     | 50.224   |
| 2      | 17.280   | 726191       | 46821786     | 49.776   |

Enantioselective:

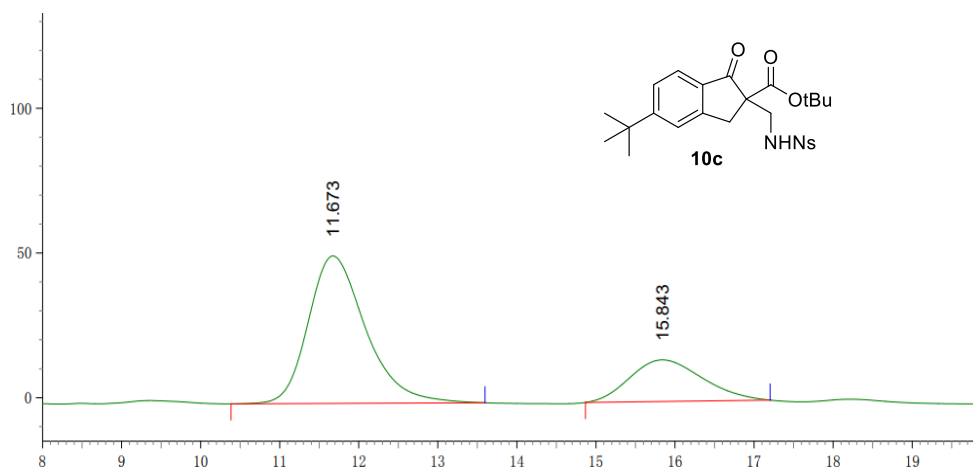

| Peak # | RT (min) | Height (mAU) | Area (mAU*s) | Area (%) |
|--------|----------|--------------|--------------|----------|
| 1      | 11.673   | 203746       | 10282570     | 73.747   |
| 2      | 15.843   | 57456        | 3660435      | 26.253   |

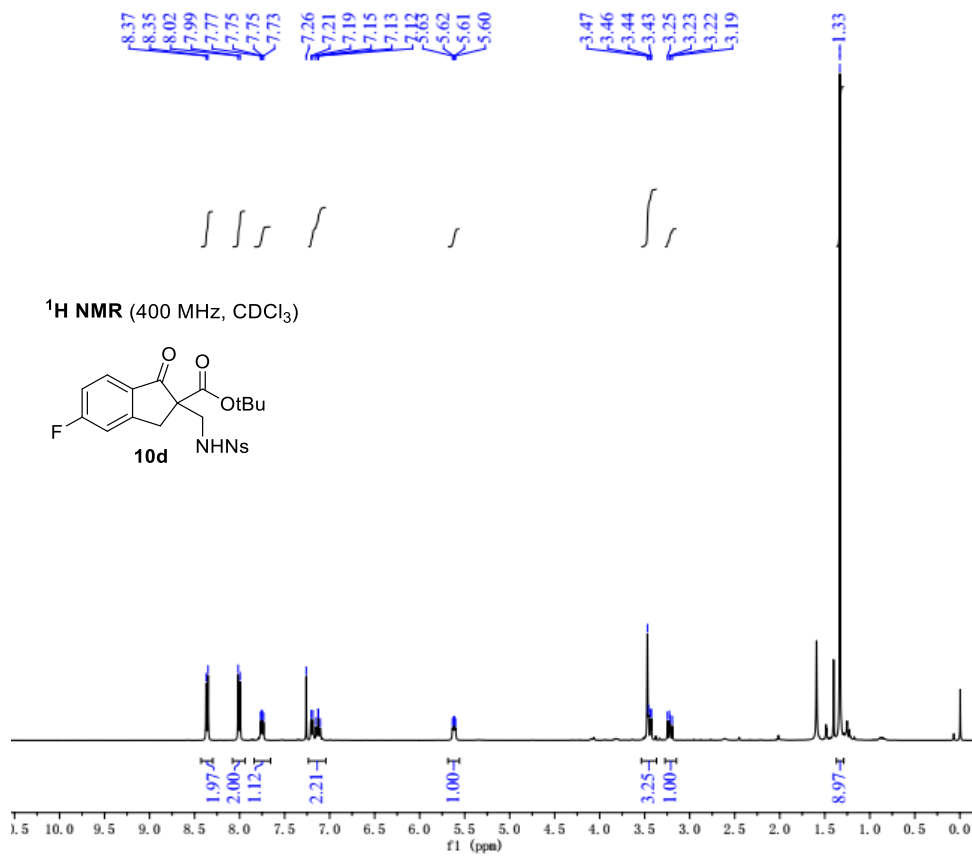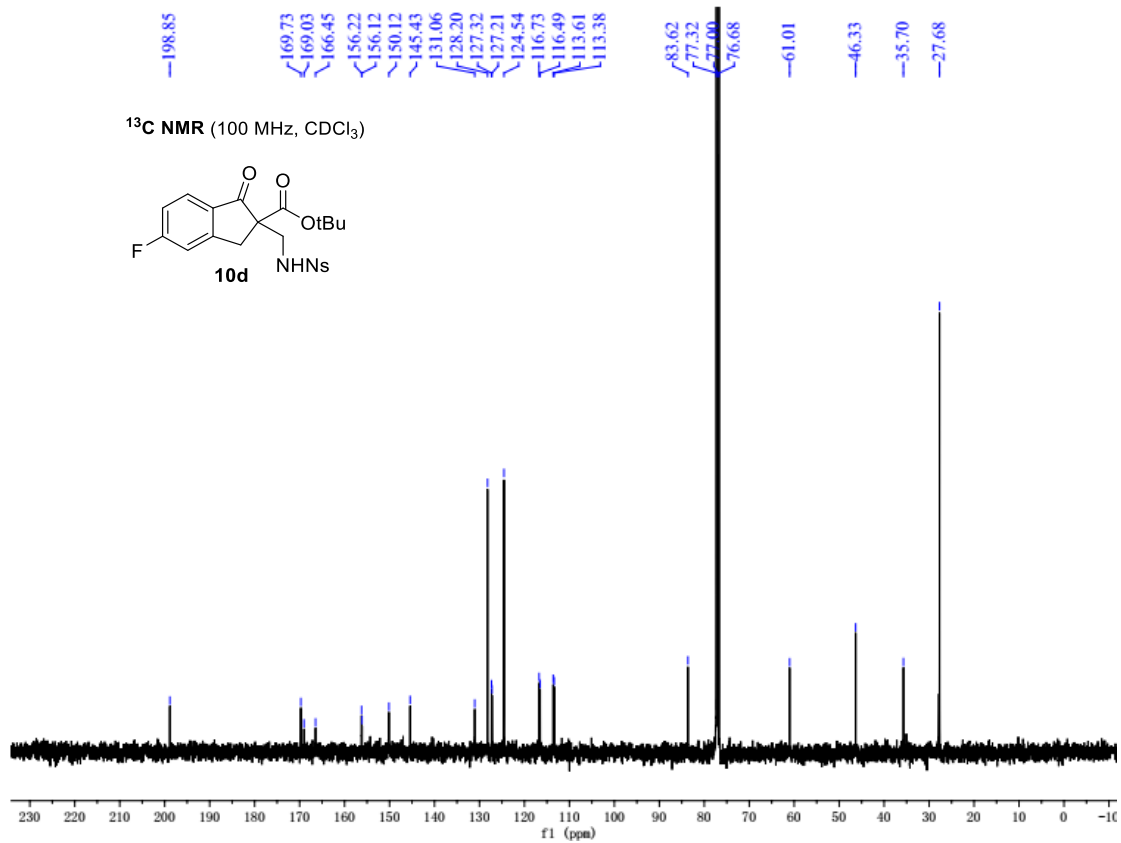

### HPLC spectrum of compound **10d**:

Racemate:

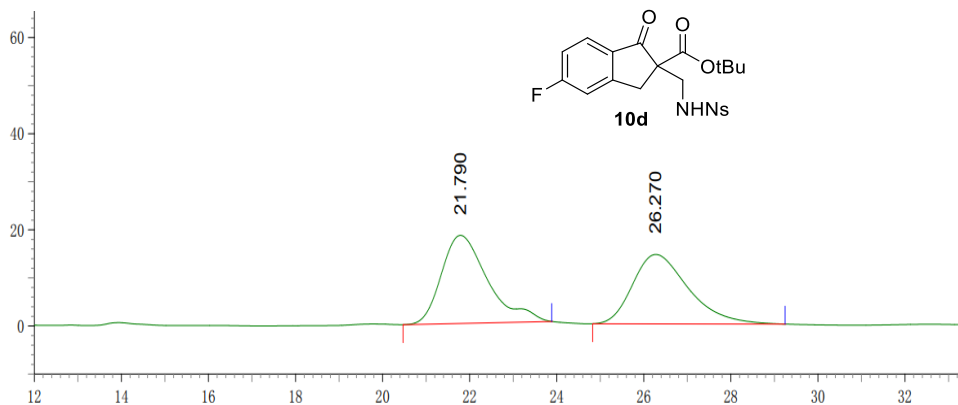

| Peak # | RT (min) | Height (mAU) | Area (mAU*s) | Area (%) |
|--------|----------|--------------|--------------|----------|
| 1      | 21.790   | 73359        | 5416753      | 51.302   |
| 2      | 26.270   | 57765        | 5141784      | 48.698   |

Enantioselective:

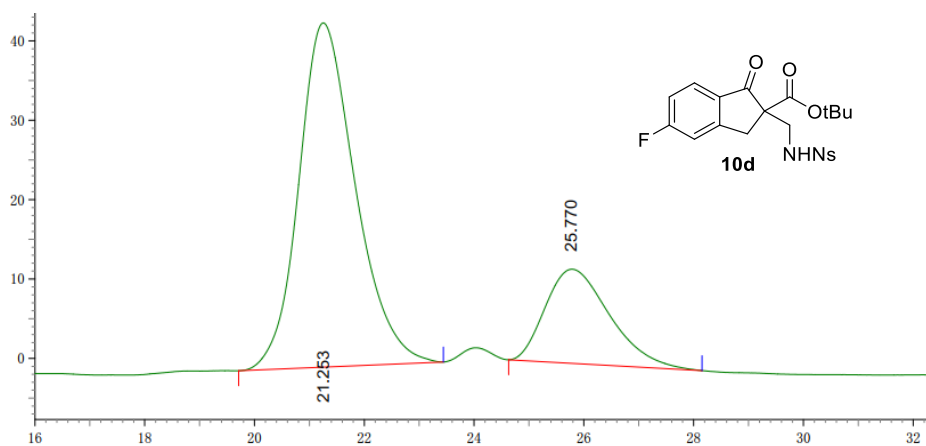

| Peak # | RT (min) | Height (mAU) | Area (mAU*s) | Area (%) |
|--------|----------|--------------|--------------|----------|
| 1      | 21.253   | 173453       | 12407201     | 76.275   |
| 2      | 25.770   | 47379        | 3859122      | 23.725   |



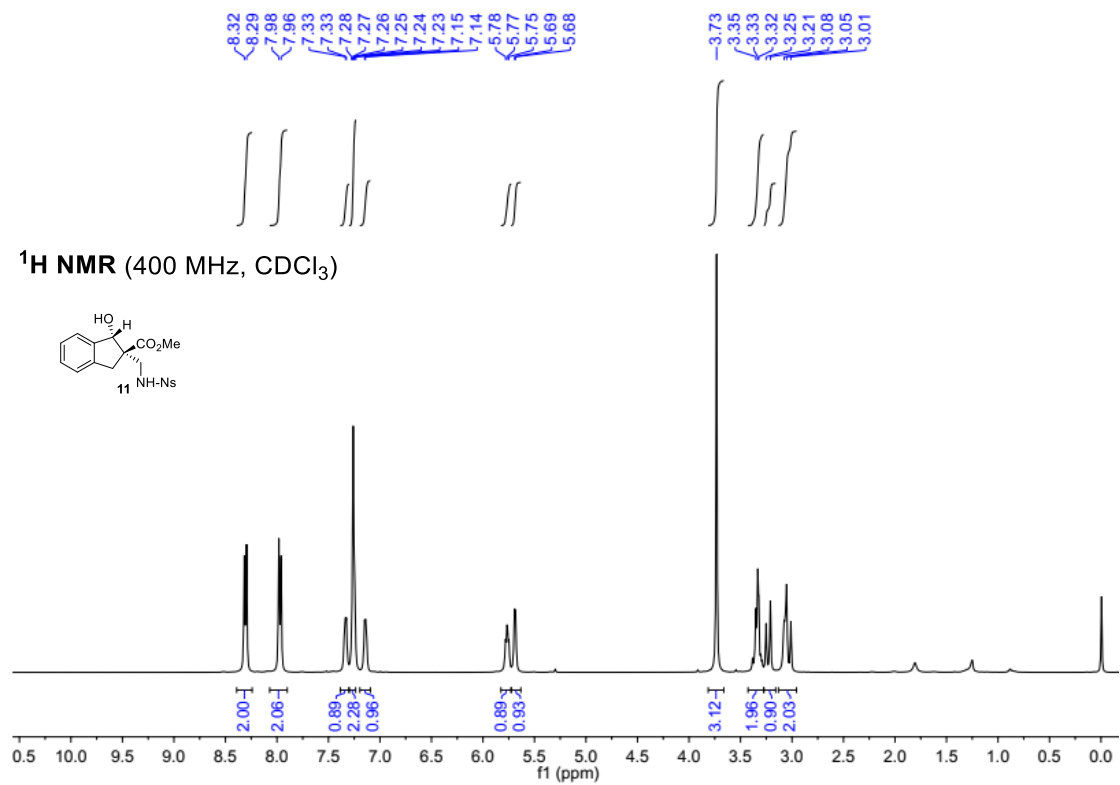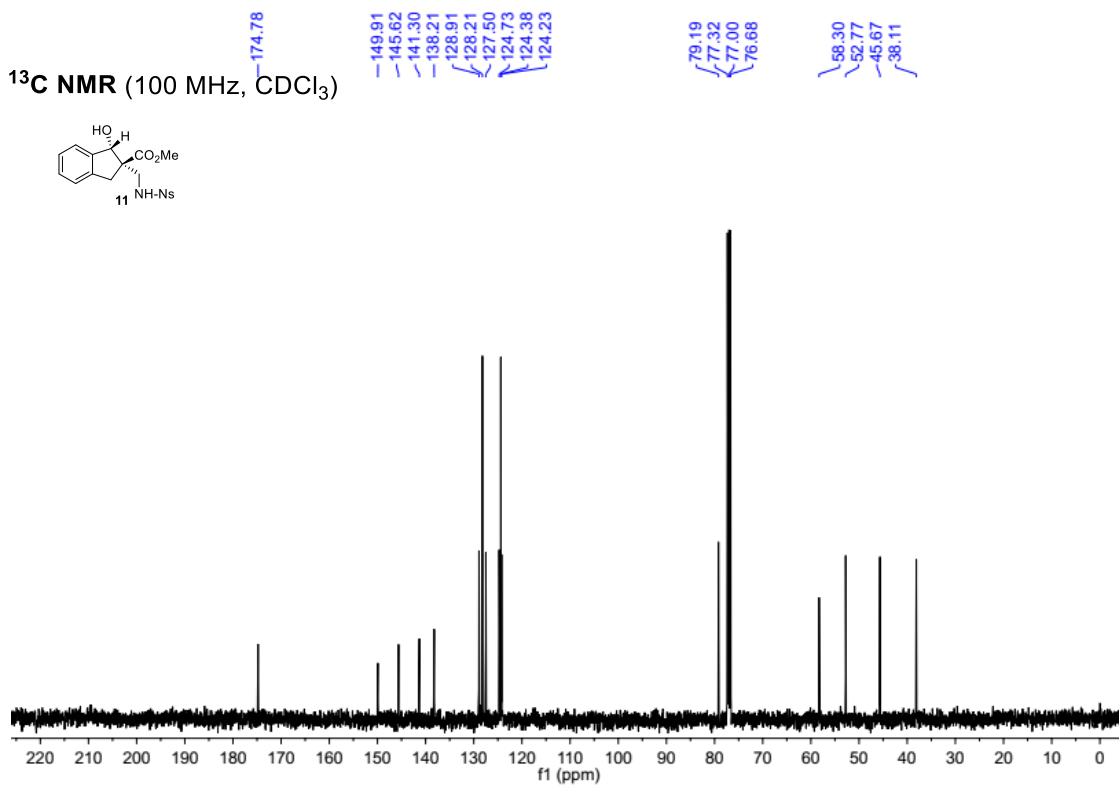

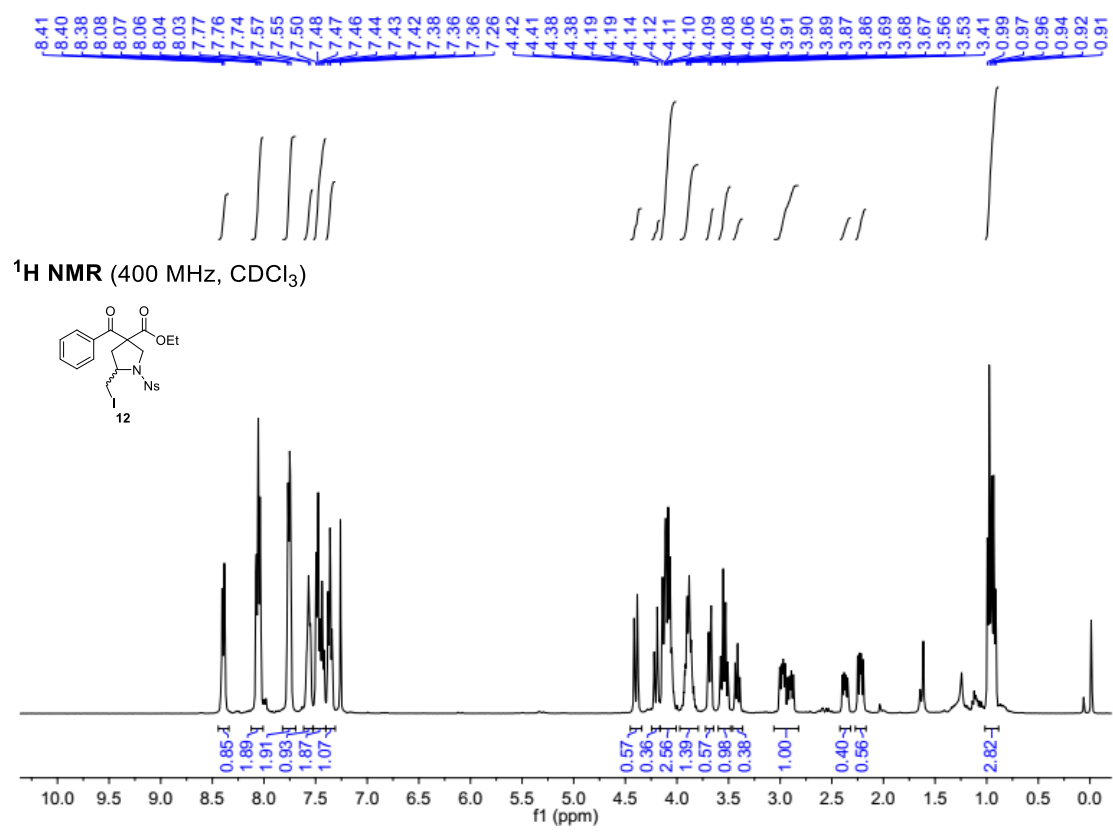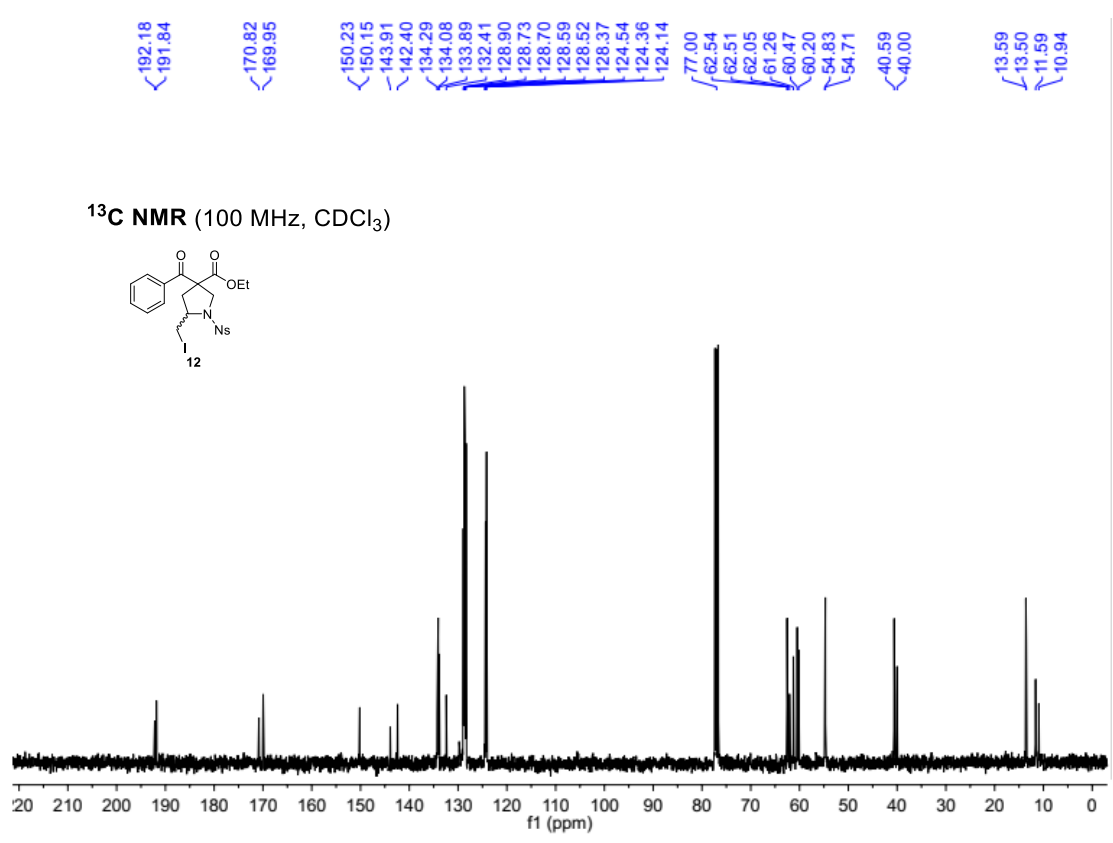

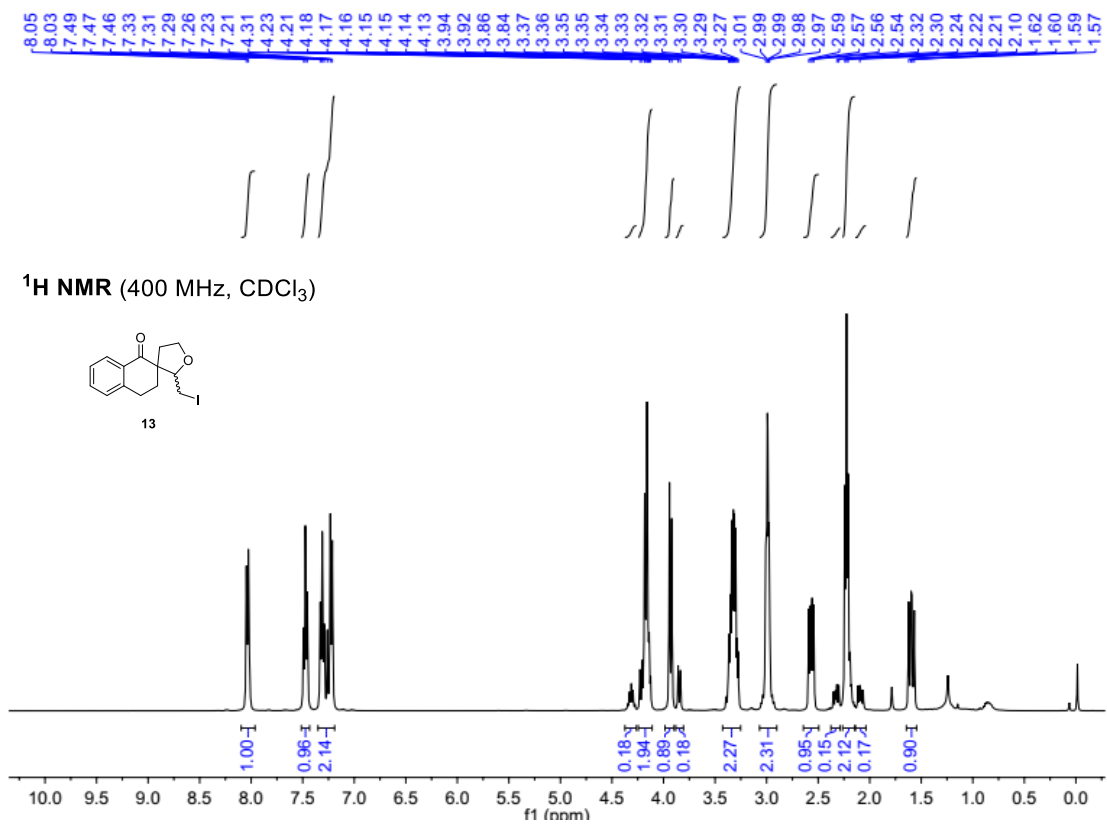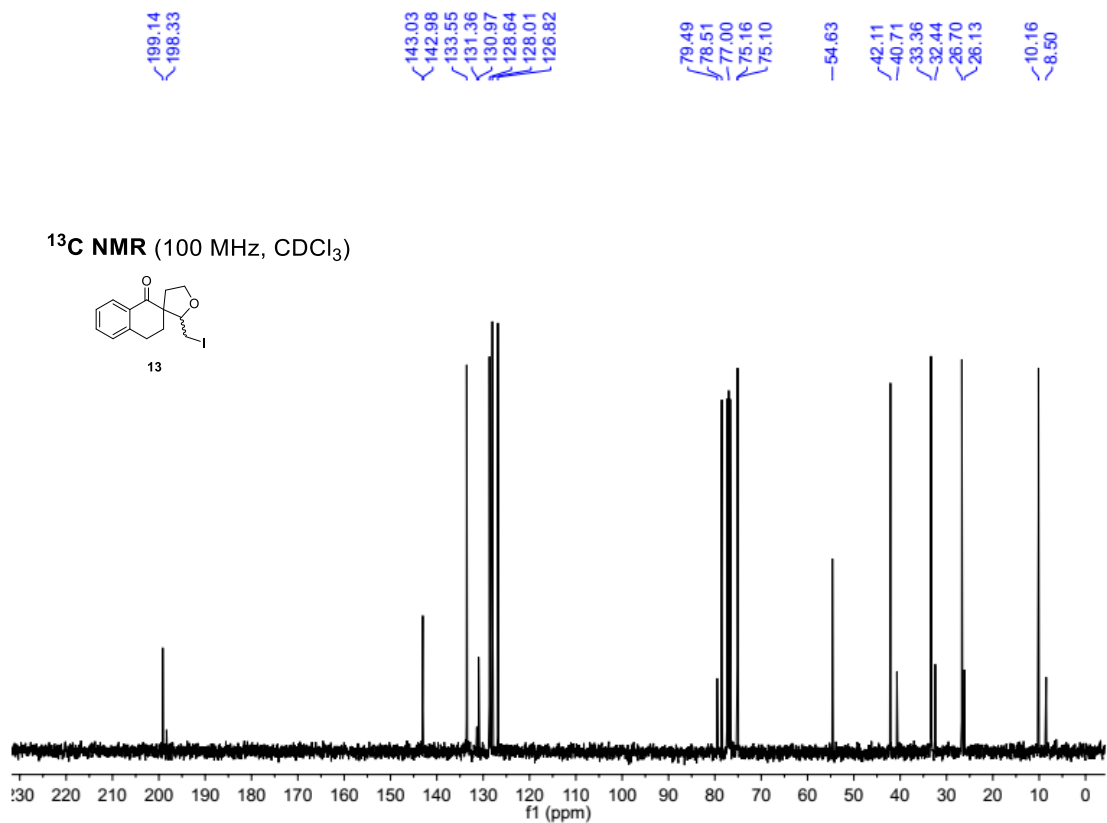

Supplement: d1qo00748c1.pdf [file d1qo00748c1.pdf]
